# Supplementary material for: Homeostatic Imbalance between Apoptosis and Cell Renewal in the Liver of Premature Aging XpdTTD Mice
Source: PubMed Central journal article supplement (PMC2396506; doi:10.1371/journal.pone.0002346), 2008-06-11
Supplement: pone.0002346.s002.pdf [file pone.0002346.s002.pdf]

**Supplementary Table 1. Xpd<sup>TTD</sup> vs. WT at young age (3 months)**

| <b>Gene</b>   | <b>Description</b>                                                                | <b>Log2 Ratio</b> | <b>Fold Change</b> | <b>P value</b> | <b>B value</b> |
|---------------|-----------------------------------------------------------------------------------|-------------------|--------------------|----------------|----------------|
| Tnfrsf6       | tumor necrosis factor receptor superfamily, member 6                              | 1.98E+00          | 3.94               | 9.19E-06       | 12.08          |
| 9130409J20Rik | Adult male cecum cDNA, RIKEN full-length enriched library, clone:9130409J20 proc  | 1.84E+00          | 3.58               | 9.19E-06       | 11.63          |
| Mt2           | metallothionein 2                                                                 | 1.60E+00          | 3.03               | 9.19E-06       | 11.50          |
| Cyp2c29       | cytochrome P450, family 2, subfamily c, polypeptide 29                            | 1.12E+00          | 2.18               | 9.19E-06       | 11.49          |
| Apoc2         | apolipoprotein C-II                                                               | 1.19E+00          | 2.28               | 1.37E-05       | 10.65          |
| Fdps          | farnesyl diphosphate synthetase                                                   | -9.78E-01         | 0.51               | 2.89E-05       | 10.23          |
| Cyp2b13       | Cytochrome P450, family 2, subfamily b, polypeptide 13 (Cyp2b13), mRNA            | -2.90E+00         | 0.13               | 3.99E-05       | 9.71           |
| Nsdhl         | NAD(P) dependent steroid dehydrogenase-like                                       | -9.62E-01         | 0.51               | 3.99E-05       | 9.61           |
| Cyp2b9        | cytochrome P450, family 2, subfamily b, polypeptide 9                             | -3.23E+00         | 0.11               | 5.52E-05       | 9.21           |
| 4933417G07Rik | Adult male testis cDNA, RIKEN full-length enriched library, clone:4933417G07 prod | 8.74E-01          | 1.83               | 4.72E-05       | 9.17           |
| Ctsl          | cathepsin L                                                                       | 6.58E-01          | 1.58               | 5.52E-05       | 9.09           |
| Fasn          | fatty acid synthase                                                               | -7.62E-01         | 0.59               | 8.02E-05       | 8.52           |
| Rps6ka3       | ribosomal protein S6 kinase polypeptide 3                                         | 2.39E+00          | 5.26               | 9.14E-05       | 8.42           |
| Tm7sf2        | transmembrane 7 superfamily member 2                                              | -6.74E-01         | 0.63               | 9.14E-05       | 8.42           |
| Clu           | clusterin                                                                         | 6.72E-01          | 1.59               | 9.34E-05       | 8.26           |
| Acaa1         | acetyl-Coenzyme A acyltransferase 1                                               | -6.49E-01         | 0.64               | 9.55E-05       | 8.25           |
| BC010711      | Unknown (protein for MGC:6827)                                                    | 1.02E+00          | 2.03               | 1.31E-04       | 7.84           |
| D0H4S114      | DNA segment, human D4S114                                                         | -8.24E-01         | 0.56               | 2.23E-04       | 7.33           |
| Socs2         | suppressor of cytokine signaling 2                                                | -1.50E+00         | 0.35               | 2.23E-04       | 7.22           |
| 8430406I07Rik | RIKEN cDNA 8430406I07 gene                                                        | -6.94E-01         | 0.62               | 2.32E-04       | 7.12           |
| Sds           | serine dehydratase                                                                | 6.37E-01          | 1.56               | 2.28E-04       | 7.11           |
| Fkbp5         | FK506 binding protein 5                                                           | 5.90E-01          | 1.51               | 2.28E-04       | 7.07           |
| Sqle          | squalene epoxidase                                                                | -1.42E+00         | 0.37               | 2.42E-04       | 7.04           |
| 1810015C04Rik | RIKEN cDNA 1810015C04 gene                                                        | 9.14E-01          | 1.88               | 2.78E-04       | 6.82           |
| Rcor          | RE1-silencing transcription factor (REST) co-repressor                            | -8.08E-01         | 0.57               | 2.78E-04       | 6.80           |
| Hmgcs2        | 3-hydroxy-3-methylglutaryl-Coenzyme A synthase 2                                  | -5.56E-01         | 0.68               | 2.87E-04       | 6.76           |
| AF032968      | Strain C3H/HeN mRNA preferentially expressed in LPS-normoresponsive macroph:      | -1.30E+00         | 0.41               | 2.78E-04       | 6.72           |
| Arpc4         | actin related protein 2/3 complex, subunit 4                                      | 1.41E+00          | 2.66               | 3.59E-04       | 6.43           |
| Dhcr7         | 7-dehydrocholesterol reductase                                                    | -4.48E-01         | 0.73               | 4.02E-04       | 6.34           |
| Ppp1r14a      | protein phosphatase 1, regulatory (inhibitor) subunit 14A                         | 6.69E-01          | 1.59               | 4.33E-04       | 6.23           |
| Nnmt          | nicotinamide N-methyltransferase                                                  | 1.15E+00          | 2.22               | 4.55E-04       | 6.17           |
| Elov15        | ELOVL family member 5, elongation of long chain fatty acids (yeast)               | -1.12E+00         | 0.46               | 4.55E-04       | 6.11           |
| Sc5d          | sterol-C5-desaturase (fungal ERG3, delta-5-desaturase) homolog (S. cerevisae)     | -6.54E-01         | 0.64               | 4.55E-04       | 6.10           |
| Rab9          | RAB9, member RAS oncogene family                                                  | -4.51E-01         | 0.73               | 4.55E-04       | 6.08           |
| Il18          | interleukin 18                                                                    | 5.64E-01          | 1.48               | 4.57E-04       | 6.05           |
| Stard4        | StAR-related lipid transfer (START) domain containing 4                           | -5.28E-01         | 0.69               | 5.59E-04       | 5.83           |

**Supplementary Table 1. Xpd<sup>TTD</sup> vs. WT at young age (3 months)**

|               |                                                                     |           |      |          |      |
|---------------|---------------------------------------------------------------------|-----------|------|----------|------|
| 5730421E18Rik | RIKEN cDNA 5730421E18 gene                                          | -5.15E-01 | 0.70 | 7.38E-04 | 5.53 |
| Lgals4        | lectin, galactose binding, soluble 4                                | -4.15E-01 | 0.75 | 7.56E-04 | 5.50 |
| Tdo2          | tryptophan 2,3-dioxygenase                                          | 7.38E-01  | 1.67 | 8.04E-04 | 5.38 |
| 2310046N15Rik | RIKEN cDNA 2310046N15 gene                                          | 8.09E-01  | 1.75 | 8.09E-04 | 5.37 |
| Nsep1         | nuclease sensitive element binding protein 1                        | 1.79E+00  | 3.46 | 8.09E-04 | 5.36 |
| Rpl10a        | ribosomal protein L10A                                              | 4.18E-01  | 1.34 | 8.63E-04 | 5.27 |
| 5730438N18Rik | RIKEN cDNA 5730438N18 gene                                          | 5.61E-01  | 1.48 | 1.07E-03 | 5.04 |
| C6            | complement component 6                                              | 1.68E+00  | 3.21 | 1.08E-03 | 5.01 |
| Lamp1         | lysosomal membrane glycoprotein 1                                   | -7.68E-01 | 0.59 | 1.08E-03 | 4.97 |
| Plxna3        | plexin A3                                                           | 5.38E-01  | 1.45 | 1.08E-03 | 4.97 |
| Cyp2b20       | cytochrome P450, family 2, subfamily b, polypeptide 20              | -2.28E+00 | 0.21 | 1.12E-03 | 4.89 |
| C8b           | complement component 8, beta subunit                                | 6.04E-01  | 1.52 | 1.12E-03 | 4.87 |
| AI595338      | expressed sequence AI595338                                         | -5.42E-01 | 0.69 | 1.12E-03 | 4.86 |
| Bteb1         | basic transcription element binding protein 1                       | 7.54E-01  | 1.69 | 1.12E-03 | 4.85 |
| Mug2          | murinoglobulin 2                                                    | 5.48E-01  | 1.46 | 1.19E-03 | 4.75 |
| Trpc3         | transient receptor potential cation channel, subfamily C, member 3  | -4.35E-01 | 0.74 | 1.19E-03 | 4.74 |
| Gfi1b         | growth factor independent 1B                                        | -1.07E+00 | 0.48 | 1.20E-03 | 4.73 |
| Zfp67         | zinc finger protein 67                                              | -8.55E-01 | 0.55 | 1.20E-03 | 4.71 |
| Gpt1          | glutamic pyruvic transaminase 1, soluble                            | 4.69E-01  | 1.38 | 1.20E-03 | 4.68 |
| Rgs4          | regulator of G-protein signaling 4                                  | 4.52E-01  | 1.37 | 1.20E-03 | 4.68 |
| AU041707      | expressed sequence AU041707                                         | 6.48E-01  | 1.57 | 1.31E-03 | 4.55 |
| Scarb1        | scavenger receptor class B, member 1                                | 4.39E-01  | 1.36 | 1.31E-03 | 4.54 |
| Kif24         | kinesin family member 24                                            | -6.33E-01 | 0.64 | 1.31E-03 | 4.52 |
| H2-Q7         | histocompatibility 2, Q region locus 7                              | -7.33E-01 | 0.60 | 1.31E-03 | 4.52 |
| Fmo2          | flavin containing monooxygenase 2                                   | -4.48E-01 | 0.73 | 1.41E-03 | 4.42 |
| Sprr1b        | small proline-rich protein 1B                                       | -6.18E-01 | 0.65 | 1.41E-03 | 4.42 |
| C9            | complement component 9                                              | 1.09E+00  | 2.13 | 1.41E-03 | 4.40 |
| Got1          | glutamate oxaloacetate transaminase 1, soluble                      | 5.50E-01  | 1.46 | 1.56E-03 | 4.29 |
| Asl           | argininosuccinate lyase                                             | 5.18E-01  | 1.43 | 1.57E-03 | 4.27 |
| Hgfac         | hepatocyte growth factor activator                                  | -4.73E-01 | 0.72 | 1.60E-03 | 4.23 |
| S100a13       | S100 calcium binding protein A13                                    | 5.85E-01  | 1.50 | 1.60E-03 | 4.22 |
| Col4a3bp      | procollagen, type IV, alpha 3 (Goodpasture antigen) binding protein | -6.36E-01 | 0.64 | 1.60E-03 | 4.21 |
| 1190004M21Rik | RIKEN cDNA 1190004M21 gene                                          | -5.41E-01 | 0.69 | 1.67E-03 | 4.15 |
| Zic3          | zinc finger protein of the cerebellum 3                             | -4.30E-01 | 0.74 | 1.69E-03 | 4.13 |
| 2610039E05Rik | RIKEN cDNA 2610039E05 gene                                          | 4.27E-01  | 1.34 | 1.72E-03 | 4.09 |
| 6230414M07Rik | RIKEN cDNA 6230414M07 gene                                          | -3.95E-01 | 0.76 | 1.77E-03 | 4.05 |
| Cyp4f15       | cytochrome P450, family 4, subfamily f, polypeptide 15              | 4.02E-01  | 1.32 | 1.77E-03 | 4.03 |

**Supplementary Table 1. Xpd<sup>TTD</sup> vs. WT at young age (3 months)**

|               |                                                                                     |           |      |          |      |
|---------------|-------------------------------------------------------------------------------------|-----------|------|----------|------|
| Piga          | phosphatidylinositol glycan, class A                                                | 5.45E-01  | 1.46 | 1.77E-03 | 4.02 |
| 4930423O20Rik | RIKEN cDNA 4930423O20 gene                                                          | -4.28E-01 | 0.74 | 1.85E-03 | 3.98 |
| Mospd3        | motile sperm domain containing 3                                                    | 5.53E-01  | 1.47 | 1.94E-03 | 3.92 |
| 1300007O09Rik | RIKEN cDNA 1300007O09 gene                                                          | -3.66E-01 | 0.78 | 2.07E-03 | 3.84 |
| Fabp1         | fatty acid binding protein 1, liver                                                 | -5.27E-01 | 0.69 | 2.07E-03 | 3.81 |
| Sth2          | sulfotransferase, hydroxysteroid preferring 2                                       | -2.81E+00 | 0.14 | 2.07E-03 | 3.80 |
| Sema3a        | sema domain, immunoglobulin domain (Ig), short basic domain, secreted, (semaphr     | -2.96E-01 | 0.81 | 2.07E-03 | 3.80 |
| 1300007C21Rik | RIKEN cDNA 1300007C21 gene                                                          | 1.03E+00  | 2.04 | 2.16E-03 | 3.75 |
| 2010320H07Rik | RIKEN cDNA 2010320H07 gene                                                          | -4.24E-01 | 0.75 | 2.24E-03 | 3.70 |
| Il1r1         | interleukin 1 receptor, type I                                                      | 9.29E-01  | 1.90 | 2.24E-03 | 3.68 |
| Ube2v1        | Ubiquitin-conjugating enzyme E2 variant 1 (Ube2v1), mRNA                            | 4.45E-01  | 1.36 | 2.24E-03 | 3.67 |
| Ndph          | Norrie disease homolog                                                              | -8.95E-01 | 0.54 | 2.24E-03 | 3.66 |
| Dnahc11       | dynein, axonemal, heavy chain 11                                                    | -6.57E-01 | 0.63 | 2.24E-03 | 3.64 |
| Pcyt2         | phosphate cytidyltransferase 2, ethanolamine                                        | -3.94E-01 | 0.76 | 2.24E-03 | 3.62 |
| D13Wsu14e     | DNA segment, Chr 13, Wayne State University 14, expressed                           | -5.31E-01 | 0.69 | 2.24E-03 | 3.61 |
| Tll           | tolloid-like                                                                        | -5.55E-01 | 0.68 | 2.24E-03 | 3.61 |
| 0610027O18Rik | RIKEN cDNA 0610027O18 gene                                                          | 4.64E-01  | 1.38 | 2.24E-03 | 3.59 |
| 5730405M13Rik | RIKEN cDNA 5730405M13 gene                                                          | -4.05E-01 | 0.76 | 2.24E-03 | 3.58 |
| Herpud1       | homocysteine-inducible, endoplasmic reticulum stress-inducible, ubiquitin-like doma | 1.09E+00  | 2.13 | 2.24E-03 | 3.58 |
| Cstb          | cystatin B                                                                          | 3.56E-01  | 1.28 | 2.24E-03 | 3.57 |
| Il6ra         | interleukin 6 receptor, alpha                                                       | 6.87E-01  | 1.61 | 2.28E-03 | 3.55 |
| 0910001A06Rik | RIKEN cDNA 0910001A06 gene                                                          | -5.47E-01 | 0.68 | 2.28E-03 | 3.54 |
| Slc38a4       | solute carrier family 38, member 4                                                  | 3.93E-01  | 1.31 | 2.29E-03 | 3.52 |
| Ppib          | peptidylprolyl isomerase B                                                          | 3.33E-01  | 1.26 | 2.29E-03 | 3.52 |
| Arih1         | ariadne ubiquitin-conjugating enzyme E2 binding protein homolog 1 (Drosophila)      | -5.67E-01 | 0.68 | 2.43E-03 | 3.46 |
| Cgn           | cingulin                                                                            | -3.56E-01 | 0.78 | 2.47E-03 | 3.43 |
| Cdk7          | cyclin-dependent kinase 7 (homolog of Xenopus MO15 cdk-activating kinase)           | -3.14E-01 | 0.80 | 2.47E-03 | 3.41 |
| Zfp7          | zinc finger protein 7                                                               | -3.81E-01 | 0.77 | 2.47E-03 | 3.39 |
| 2610318G18Rik | RIKEN cDNA 2610318G18 gene                                                          | 5.04E-01  | 1.42 | 2.47E-03 | 3.38 |
| 4933433D23Rik | RIKEN cDNA 4933433D23 gene                                                          | -9.95E-01 | 0.50 | 2.47E-03 | 3.38 |
| 5430404L10Rik | RIKEN cDNA 5430404L10 gene                                                          | -5.12E-01 | 0.70 | 2.47E-03 | 3.38 |
| Kns2          | kinesin 2                                                                           | -3.33E-01 | 0.79 | 2.47E-03 | 3.37 |
| 9030417F11Rik | Adult male colon cDNA, RIKEN full-length enriched library, clone:9030417F11 prod    | -3.63E-01 | 0.78 | 2.47E-03 | 3.37 |
| Klrb1a        | killer cell lectin-like receptor subfamily B member 1A                              | -3.17E-01 | 0.80 | 2.49E-03 | 3.34 |
| 2310043J07Rik | RIKEN cDNA 2310043J07 gene                                                          | 6.11E-01  | 1.53 | 2.52E-03 | 3.32 |
| Idb2          | inhibitor of DNA binding 2                                                          | -7.39E-01 | 0.60 | 2.63E-03 | 3.27 |
| Arfgap3       | ADP-ribosylation factor GTPase activating protein 3                                 | -4.53E-01 | 0.73 | 2.66E-03 | 3.26 |

**Supplementary Table 1. Xpd<sup>TTD</sup> vs. WT at young age (3 months)**

|               |                                                                                     |           |      |          |      |
|---------------|-------------------------------------------------------------------------------------|-----------|------|----------|------|
| Traf1         | Tnf receptor-associated factor 1                                                    | 4.37E-01  | 1.35 | 2.68E-03 | 3.24 |
| Serpina3c     | serine (or cysteine) proteinase inhibitor, clade A, member 3C                       | 8.48E-01  | 1.80 | 2.68E-03 | 3.22 |
| Fdft1         | farnesyl diphosphate farnesyl transferase 1                                         | -5.07E-01 | 0.70 | 2.86E-03 | 3.16 |
| Prg2          | proteoglycan 2, bone marrow                                                         | -3.60E-01 | 0.78 | 2.97E-03 | 3.10 |
| Ppp2r4        | protein phosphatase 2A, regulatory subunit B (PR 53)                                | 4.72E-01  | 1.39 | 3.01E-03 | 3.09 |
| Mib1          | mindbomb homolog 1 (Drosophila)                                                     | -3.78E-01 | 0.77 | 3.03E-03 | 3.07 |
| Apom          | apolipoprotein M                                                                    | 3.67E-01  | 1.29 | 3.03E-03 | 3.07 |
| Rps5          | ribosomal protein S5                                                                | 4.49E-01  | 1.36 | 3.03E-03 | 3.05 |
| Hao3          | hydroxyacid oxidase (glycolate oxidase) 3                                           | -9.57E-01 | 0.52 | 3.20E-03 | 2.99 |
| 5330426L24Rik | RIKEN cDNA 5330426L24 gene                                                          | -5.44E-01 | 0.69 | 3.23E-03 | 2.99 |
| 4933421H10Rik | RIKEN cDNA 4933421H10 gene                                                          | 5.11E-01  | 1.43 | 3.25E-03 | 2.97 |
| 4930503E24Rik | Adult male testis cDNA, RIKEN full-length enriched library, clone:4930503E24 prod   | 4.68E-01  | 1.38 | 3.28E-03 | 2.94 |
| Cyp51         | cytochrome P450, 51                                                                 | -4.25E-01 | 0.75 | 3.28E-03 | 2.93 |
| Epim          | epimorphin                                                                          | -5.65E-01 | 0.68 | 3.28E-03 | 2.92 |
| 2900011O08Rik | RIKEN cDNA 2900011O08 gene                                                          | 8.13E-01  | 1.76 | 3.28E-03 | 2.92 |
| C130005F21Rik | 16 days embryo head cDNA, RIKEN full-length enriched library, clone:C130005F21      | -4.94E-01 | 0.71 | 3.28E-03 | 2.92 |
| 9030624L02Rik | RIKEN cDNA 9030624L02 gene                                                          | -3.32E-01 | 0.79 | 3.28E-03 | 2.92 |
| 1500006O09Rik | RIKEN cDNA 1500006O09 gene                                                          | 4.38E-01  | 1.35 | 3.41E-03 | 2.87 |
| Ctsh          | cathepsin H                                                                         | 3.85E-01  | 1.31 | 3.41E-03 | 2.86 |
| Rad51ap1      | RAD51 associated protein 1                                                          | -5.28E-01 | 0.69 | 3.54E-03 | 2.82 |
| Tcam1         | testicular cell adhesion molecule 1                                                 | 6.09E-01  | 1.52 | 3.54E-03 | 2.79 |
| 2410116I05Rik | RIKEN cDNA 2410116I05 gene                                                          | -4.58E-01 | 0.73 | 3.58E-03 | 2.79 |
| Zfp292        | zinc finger protein 292                                                             | -3.85E-01 | 0.77 | 3.58E-03 | 2.78 |
| Impk          | inositol polyphosphate multikinase                                                  | 4.84E-01  | 1.40 | 3.61E-03 | 2.78 |
| H47           | histocompatibility 47                                                               | 3.16E-01  | 1.24 | 3.67E-03 | 2.72 |
| Sh3bgrl       | SH3-binding domain glutamic acid-rich protein like                                  | -4.03E-01 | 0.76 | 3.67E-03 | 2.72 |
| Abcd3         | ATP-binding cassette, sub-family D (ALD), member 3                                  | -3.21E-01 | 0.80 | 3.82E-03 | 2.66 |
| Cts3          | cathepsin 3                                                                         | -4.87E-01 | 0.71 | 3.98E-03 | 2.65 |
| Lpin1         | lipin 1                                                                             | 1.59E+00  | 3.00 | 3.84E-03 | 2.64 |
| Usp2          | ubiquitin specific protease 2                                                       | 6.11E-01  | 1.53 | 4.17E-03 | 2.58 |
| 1810009M01Rik | RIKEN cDNA 1810009M01 gene                                                          | 4.42E-01  | 1.36 | 4.17E-03 | 2.57 |
| Adamts1       | a disintegrin-like and metalloprotease (reprolysin type) with thrombospondin type 1 | -4.94E-01 | 0.71 | 4.14E-03 | 2.57 |
| 2310014H01Rik | RIKEN cDNA 2310014H01 gene                                                          | 4.53E-01  | 1.37 | 4.17E-03 | 2.56 |
| Fcgr2b        | Fc receptor, IgG, low affinity IIb                                                  | -3.41E-01 | 0.79 | 4.36E-03 | 2.52 |
| 2900075G08Rik | RIKEN cDNA 2900075G08 gene                                                          | -1.02E+00 | 0.49 | 4.42E-03 | 2.49 |
| 2610028D06Rik | 10 days embryo whole body cDNA, RIKEN full-length enriched library, clone:26100     | -4.08E-01 | 0.75 | 4.42E-03 | 2.48 |
| Pit1          | pituitary specific transcription factor 1                                           | -4.66E-01 | 0.72 | 4.42E-03 | 2.47 |

**Supplementary Table 1. Xpd<sup>TTD</sup> vs. WT at young age (3 months)**

|               |                                                                                    |           |      |          |      |
|---------------|------------------------------------------------------------------------------------|-----------|------|----------|------|
| Cebpb         | CCAAT/enhancer binding protein (C/EBP), beta                                       | 1.04E+00  | 2.05 | 4.36E-03 | 2.46 |
| 2610103J23Rik | RIKEN cDNA 2610103J23 gene                                                         | 4.66E-01  | 1.38 | 4.42E-03 | 2.46 |
| Ulk1          | Unc-51 like kinase 1 (C. elegans)                                                  | -3.47E-01 | 0.79 | 4.46E-03 | 2.46 |
| 9430020K01Rik | RIKEN cDNA 9430020K01 gene                                                         | -3.08E-01 | 0.81 | 4.42E-03 | 2.45 |
| Fbxo32        | F-box only protein 32                                                              | 5.82E-01  | 1.50 | 4.46E-03 | 2.41 |
| Mmp17         | matrix metalloproteinase 17                                                        | -4.61E-01 | 0.73 | 4.59E-03 | 2.40 |
| AI595338      | expressed sequence AI595338                                                        | 5.55E-01  | 1.47 | 4.59E-03 | 2.39 |
| 1700121N20Rik | Adult male testis cDNA, RIKEN full-length enriched library, clone:1700121N20 prod  | -3.61E-01 | 0.78 | 4.65E-03 | 2.36 |
| Hrg           | histidine-rich glycoprotein                                                        | 5.20E-01  | 1.43 | 4.61E-03 | 2.36 |
| Aqp8          | aquaporin 8                                                                        | -7.09E-01 | 0.61 | 4.68E-03 | 2.35 |
| 0610012C11Rik | Adult male kidney cDNA, RIKEN full-length enriched library, clone:0610012C11 pro   | 4.74E-01  | 1.39 | 4.76E-03 | 2.34 |
| Pdk4          | pyruvate dehydrogenase kinase, isoenzyme 4                                         | -4.29E-01 | 0.74 | 4.74E-03 | 2.33 |
| 2010012L10Rik | RIKEN cDNA 2010012L10 gene                                                         | -3.86E-01 | 0.77 | 4.68E-03 | 2.32 |
| Cdx1          | caudal type homeo box 1                                                            | 7.78E-01  | 1.72 | 4.76E-03 | 2.30 |
| 9430059D04Rik | RIKEN cDNA 9430059D04 gene                                                         | -4.44E-01 | 0.73 | 4.74E-03 | 2.29 |
| 1810063P04Rik | RIKEN cDNA 1810063P04 gene                                                         | 4.25E-01  | 1.34 | 4.80E-03 | 2.29 |
| Fabp3         | fatty acid binding protein 3, muscle and heart                                     | -3.26E-01 | 0.80 | 4.80E-03 | 2.28 |
| 2610318G18Rik | RIKEN cDNA 2610318G18 gene                                                         | -4.94E-01 | 0.71 | 5.04E-03 | 2.23 |
| BC014805      | cDNA sequence BC014805                                                             | -6.40E-01 | 0.64 | 5.00E-03 | 2.22 |
| 5830445D09Rik | RIKEN cDNA 5830445D09 gene                                                         | -3.43E-01 | 0.79 | 5.14E-03 | 2.19 |
| Arl6ip3       | ADP-ribosylation factor-like 6 interacting protein 3                               | 4.63E-01  | 1.38 | 5.13E-03 | 2.19 |
| Smarcd2       | SWI/SNF related, matrix associated, actin dependent regulator of chromatin, subfar | 3.69E-01  | 1.29 | 5.04E-03 | 2.18 |
| Gpld1         | glycosylphosphatidylinositol specific phospholipase D1                             | 4.04E-01  | 1.32 | 5.08E-03 | 2.17 |
| 1110033J19Rik | RIKEN cDNA 1110033J19 gene                                                         | 5.57E-01  | 1.47 | 5.33E-03 | 2.15 |
| Krt1-18       | keratin complex 1, acidic, gene 18                                                 | 4.05E-01  | 1.32 | 5.14E-03 | 2.13 |
| Pla2g12a      | phospholipase A2, group XIIA                                                       | 4.38E-01  | 1.36 | 5.31E-03 | 2.13 |
| Fxyd4         | FXDY domain-containing ion transport regulator 4                                   | -3.53E-01 | 0.78 | 5.35E-03 | 2.12 |
| Cox5a         | cytochrome c oxidase, subunit Va                                                   | 3.43E-01  | 1.27 | 5.33E-03 | 2.11 |
| 5730403B10Rik | RIKEN cDNA 5730403B10 gene                                                         | 5.30E-01  | 1.44 | 5.47E-03 | 2.09 |
| Cpb2          | carboxypeptidase B2 (plasma)                                                       | 5.08E-01  | 1.42 | 5.48E-03 | 2.09 |
| Tpi           | triosephosphate isomerase                                                          | 3.65E-01  | 1.29 | 5.48E-03 | 2.08 |
| Pltp          | phospholipid transfer protein                                                      | -5.05E-01 | 0.70 | 5.61E-03 | 2.06 |
| Nfe2l1        | nuclear factor, erythroid derived 2,-like 1                                        | 5.38E-01  | 1.45 | 5.65E-03 | 2.03 |
| A730008L03Rik | RIKEN cDNA A730008L03 gene                                                         | -3.60E-01 | 0.78 | 5.65E-03 | 2.03 |
| Chrng         | cholinergic receptor, nicotinic, gamma polypeptide                                 | -4.27E-01 | 0.74 | 5.75E-03 | 2.02 |
| Cbfa2t1h      | CBFA2T1 identified gene homolog (human)                                            | 3.49E-01  | 1.27 | 5.72E-03 | 2.01 |
| Entpd1        | ectonucleoside triphosphate diphosphohydrolase 1                                   | -2.86E-01 | 0.82 | 5.72E-03 | 1.99 |

**Supplementary Table 1. Xpd<sup>TTD</sup> vs. WT at young age (3 months)**

|               |                                                                                   |           |      |          |      |
|---------------|-----------------------------------------------------------------------------------|-----------|------|----------|------|
| Junb          | Jun-B oncogene                                                                    | 7.80E-01  | 1.72 | 5.65E-03 | 1.99 |
| Slc12a7       | solute carrier family 12, member 7                                                | -3.60E-01 | 0.78 | 5.87E-03 | 1.96 |
| Upp2          | uridine phosphorylase 2                                                           | 1.08E+00  | 2.12 | 5.80E-03 | 1.95 |
| X05546        |                                                                                   | -6.34E-01 | 0.64 | 6.04E-03 | 1.94 |
| Itgb4bp       | integrin beta 4 binding protein                                                   | 5.16E-01  | 1.43 | 5.87E-03 | 1.93 |
| Rps24         | ribosomal protein S24                                                             | 4.25E-01  | 1.34 | 6.13E-03 | 1.90 |
| Psmc2         | proteasome (prosome, macropain) 26S subunit, non-ATPase, 2                        | 4.70E-01  | 1.39 | 6.17E-03 | 1.86 |
| 1700023F06Rik | RIKEN cDNA 1700023F06 gene                                                        | 3.99E-01  | 1.32 | 6.56E-03 | 1.86 |
| 4930403J22Rik | RIKEN cDNA 4930403J22 gene                                                        | -3.33E-01 | 0.79 | 6.44E-03 | 1.80 |
| Cul4a         | cullin 4A                                                                         | -4.30E-01 | 0.74 | 6.76E-03 | 1.77 |
| Pgk1          | Phosphoglycerate kinase 1 (Pgk1), mRNA                                            | 3.46E-01  | 1.27 | 6.82E-03 | 1.77 |
| BC013672      | cDNA sequence BC013672                                                            | -5.08E-01 | 0.70 | 7.59E-03 | 1.70 |
| 4930486A15Rik | Adult male testis cDNA, RIKEN full-length enriched library, clone:4930486A15 prod | -3.64E-01 | 0.78 | 7.59E-03 | 1.67 |
| Ptpn18        | protein tyrosine phosphatase, non-receptor type 18                                | -3.27E-01 | 0.80 | 7.59E-03 | 1.67 |
| Hal           | histidine ammonia lyase                                                           | 3.67E-01  | 1.29 | 7.60E-03 | 1.64 |
| Saa3          | serum amyloid A 3                                                                 | 8.83E-01  | 1.84 | 7.64E-03 | 1.63 |
| Cox7b         | cytochrome c oxidase subunit VIIb                                                 | -3.48E-01 | 0.79 | 7.64E-03 | 1.61 |
| Hrc           | histidine rich calcium binding protein                                            | -9.64E-01 | 0.51 | 7.64E-03 | 1.60 |
| Atoh7         | atonal homolog 7 (Drosophila)                                                     | -5.26E-01 | 0.69 | 7.64E-03 | 1.60 |
| H2afz         | H2A histone family, member Z                                                      | 3.73E-01  | 1.30 | 7.88E-03 | 1.59 |
| Onecut1       | one cut domain, family member 1                                                   | -6.36E-01 | 0.64 | 7.74E-03 | 1.58 |
| Cyp1a2        | cytochrome P450, family 1, subfamily a, polypeptide 2                             | 5.42E-01  | 1.46 | 7.64E-03 | 1.58 |
| Dnmt3l        | DNA (cytosine-5-)-methyltransferase 3-like                                        | -2.85E-01 | 0.82 | 7.64E-03 | 1.57 |
| 2310042N02Rik | RIKEN cDNA 2310042N02 gene                                                        | 5.53E-01  | 1.47 | 7.74E-03 | 1.57 |
| Dp1           | deleted in polyposis 1                                                            | -2.77E-01 | 0.83 | 7.88E-03 | 1.54 |
| 1700009P03Rik | RIKEN cDNA 1700009P03 gene                                                        | 5.04E-01  | 1.42 | 8.11E-03 | 1.53 |
| Rdh1          | retinol dehydrogenase 1 (all trans)                                               | -4.20E-01 | 0.75 | 7.88E-03 | 1.53 |
| Pumag         | interferon-gamma inducible gene, Puma-g                                           | -3.63E-01 | 0.78 | 8.16E-03 | 1.51 |
| 4833420D23Rik | 0 day neonate head cDNA, RIKEN full-length enriched library, clone:4833420D23 p   | -3.20E-01 | 0.80 | 8.22E-03 | 1.49 |
| Ebpl          | emopamil binding protein-like                                                     | -4.25E-01 | 0.75 | 7.89E-03 | 1.49 |
| 2700071E21Rik | RIKEN cDNA 2700071E21 gene                                                        | -3.21E-01 | 0.80 | 8.22E-03 | 1.49 |
| Prkcsh        | protein kinase C substrate 80K-H                                                  | 4.44E-01  | 1.36 | 8.22E-03 | 1.48 |
| Hadh2         | hydroxyacyl-Coenzyme A dehydrogenase type II                                      | 3.32E-01  | 1.26 | 8.22E-03 | 1.47 |
| 2310061B02Rik | RIKEN cDNA 2310061B02 gene                                                        | 2.98E-01  | 1.23 | 8.30E-03 | 1.46 |
| Galr3         | galanin receptor 3                                                                | -3.53E-01 | 0.78 | 8.39E-03 | 1.45 |
| Sh3bgrl       | SH3-binding domain glutamic acid-rich protein like                                | -5.03E-01 | 0.71 | 8.22E-03 | 1.45 |
| Raet1c        | retinoic acid early transcript gamma                                              | -2.52E-01 | 0.84 | 8.22E-03 | 1.45 |

**Supplementary Table 1. Xpd<sup>TTD</sup> vs. WT at young age (3 months)**

|               |                                                                                     |           |      |          |      |
|---------------|-------------------------------------------------------------------------------------|-----------|------|----------|------|
| Ass1          | argininosuccinate synthetase 1                                                      | 5.54E-01  | 1.47 | 8.22E-03 | 1.45 |
| 1600020H07Rik | RIKEN cDNA 1600020H07 gene                                                          | -6.05E-01 | 0.66 | 8.22E-03 | 1.44 |
| 5830415G21Rik | Adult male thymus cDNA, RIKEN full-length enriched library, clone:5830415G21 pr     | -3.08E-01 | 0.81 | 8.22E-03 | 1.42 |
| Sult3a1       | sulfotransferase family 3A, member 1                                                | -1.11E+00 | 0.46 | 8.46E-03 | 1.42 |
| 2810003K23Rik | RIKEN cDNA 2810003K23 gene                                                          | -3.51E-01 | 0.78 | 8.32E-03 | 1.41 |
| Dstn          | destrin                                                                             | 3.32E-01  | 1.26 | 8.46E-03 | 1.40 |
| Cfi           | complement component factor i                                                       | 3.15E-01  | 1.24 | 8.46E-03 | 1.39 |
| Klf13         | Kruppel-like factor 13                                                              | 4.35E-01  | 1.35 | 8.46E-03 | 1.39 |
| Trim25        | B6-derived CD11 +ve dendritic cells cDNA, RIKEN full-length enriched library, clone | -3.55E-01 | 0.78 | 8.46E-03 | 1.39 |
| Prlr          | prolactin receptor                                                                  | -4.65E-01 | 0.72 | 8.46E-03 | 1.39 |
| Ifrd2         | interferon-related developmental regulator 2                                        | 2.88E-01  | 1.22 | 8.38E-03 | 1.39 |
| Rps3a         | ribosomal protein S3a                                                               | 3.22E-01  | 1.25 | 8.39E-03 | 1.38 |
| Ager          | advanced glycosylation end product-specific receptor                                | -3.51E-01 | 0.78 | 8.46E-03 | 1.37 |
| Rarres2       | retinoic acid receptor responder (tazarotene induced) 2                             | 5.14E-01  | 1.43 | 8.46E-03 | 1.36 |
| Nrbp          | nuclear receptor binding protein                                                    | 6.81E-01  | 1.60 | 8.55E-03 | 1.35 |
| Cyp7b1        | cytochrome P450, family 7, subfamily b, polypeptide 1                               | 1.50E+00  | 2.84 | 8.55E-03 | 1.34 |
| Hrsp12        | heat-responsive protein 12                                                          | -3.92E-01 | 0.76 | 8.46E-03 | 1.34 |
| Lcat          | lecithin cholesterol acyltransferase                                                | 3.55E-01  | 1.28 | 8.46E-03 | 1.32 |
| 2810484M10Rik | RIKEN cDNA 2810484M10 gene                                                          | 2.35E-01  | 1.18 | 8.55E-03 | 1.31 |
| E130003L02Rik | 0 day neonate eyeball cDNA, RIKEN full-length enriched library, clone:E130003L02    | -4.69E-01 | 0.72 | 9.04E-03 | 1.30 |
| Vtn           | vitronectin                                                                         | 5.14E-01  | 1.43 | 8.46E-03 | 1.30 |
| Ldhd          | lactate dehydrogenase D                                                             | 4.02E-01  | 1.32 | 9.07E-03 | 1.29 |
| Atp1a1        | ATPase, Na <sup>+</sup> /K <sup>+</sup> transporting, alpha 1 polypeptide           | 2.90E-01  | 1.22 | 9.04E-03 | 1.28 |
| Gpt1          | glutamic pyruvic transaminase 1, soluble                                            | 2.39E-01  | 1.18 | 9.01E-03 | 1.25 |
| Dck           | deoxycytidine kinase                                                                | -2.59E-01 | 0.84 | 9.15E-03 | 1.25 |
| LOC241251     | Hypothetical LOC241251 (LOC241251), mRNA                                            | -3.18E-01 | 0.80 | 9.01E-03 | 1.24 |
| C4bp          | complement component 4 binding protein                                              | 3.31E-01  | 1.26 | 9.04E-03 | 1.24 |
| Cebpd         | CCAAT/enhancer binding protein (C/EBP), delta                                       | 4.71E-01  | 1.39 | 9.15E-03 | 1.22 |
| 1700129C05Rik | RIKEN cDNA 1700129C05 gene                                                          | -8.69E-01 | 0.55 | 9.44E-03 | 1.20 |
| Chrna4        | cholinergic receptor, nicotinic, alpha polypeptide 4                                | -2.56E-01 | 0.84 | 9.36E-03 | 1.19 |
| Ian1          | immune associated nucleotide 1                                                      | 3.45E-01  | 1.27 | 9.90E-03 | 1.17 |
| Akr7a5        | aldo-keto reductase family 7, member A5 (aflatoxin aldehyde reductase)              | 2.40E-01  | 1.18 | 9.36E-03 | 1.16 |
| Eif5a         | eukaryotic translation initiation factor 5A                                         | 3.90E-01  | 1.31 | 9.46E-03 | 1.15 |
| 4921503C21Rik | RIKEN cDNA 4921503C21 gene                                                          | -2.61E-01 | 0.83 | 9.46E-03 | 1.15 |
| Zfp60         | zinc finger protein 60                                                              | -3.07E-01 | 0.81 | 9.58E-03 | 1.14 |
| Abcg5         | ATP-binding cassette, sub-family G (WHITE), member 5                                | 4.76E-01  | 1.39 | 9.73E-03 | 1.13 |
| Hint1         | histidine triad nucleotide binding protein 1                                        | 3.84E-01  | 1.31 | 9.74E-03 | 1.13 |

**Supplementary Table 1. Xpd<sup>TTD</sup> vs. WT at young age (3 months)**

|               |                                                                                   |           |      |          |      |
|---------------|-----------------------------------------------------------------------------------|-----------|------|----------|------|
| Senp2         | SUMO/sentrin specific protease 2                                                  | 3.39E-01  | 1.27 | 1.00E-02 | 1.13 |
| 4933401J01Rik | Adult male testis cDNA, RIKEN full-length enriched library, clone:4933401J01 prod | -4.50E-01 | 0.73 | 9.93E-03 | 1.12 |
| 2210411K11Rik | RIKEN cDNA 2210411K11 gene                                                        | 5.06E-01  | 1.42 | 9.93E-03 | 1.12 |
| 9030624J02Rik | RIKEN cDNA 9030624J02 gene                                                        | -2.89E-01 | 0.82 | 1.01E-02 | 1.11 |
| Dsip1         | delta sleep inducing peptide, immunoreactor                                       | 9.53E-01  | 1.94 | 9.95E-03 | 1.09 |
| Klra17        | killer cell lectin-like receptor, subfamily A, member 17                          | -2.64E-01 | 0.83 | 9.90E-03 | 1.09 |
| Gkn1          | gastrokine 1                                                                      | -6.42E-01 | 0.64 | 1.01E-02 | 1.07 |
| Rpl36al       | ribosomal protein L36a-like                                                       | 3.83E-01  | 1.30 | 1.01E-02 | 1.07 |
| Psmb4         | proteasome (prosome, macropain) subunit, beta type 4                              | 3.25E-01  | 1.25 | 1.02E-02 | 1.07 |
| Snap91        | synaptosomal-associated protein 91                                                | 5.27E-01  | 1.44 | 1.01E-02 | 1.04 |
| Mpp5          | membrane protein, palmitoylated 5 (MAGUK p55 subfamily member 5)                  | 2.58E-01  | 1.20 | 1.05E-02 | 1.02 |
| 2310061N23Rik | RIKEN cDNA 2310061N23 gene                                                        | -3.52E-01 | 0.78 | 1.08E-02 | 1.01 |
| 2010110O04Rik | RIKEN cDNA 2010110O04 gene                                                        | -3.01E-01 | 0.81 | 1.08E-02 | 1.01 |
| Bcat1         | branched chain aminotransferase 1, cytosolic                                      | -4.52E-01 | 0.73 | 1.05E-02 | 1.00 |
| Hk2           | hexokinase 2                                                                      | -7.97E-01 | 0.58 | 1.08E-02 | 1.00 |
| 1810023F06Rik | RIKEN cDNA 1810023F06 gene                                                        | -4.26E-01 | 0.74 | 1.07E-02 | 0.99 |
| 4930579P08Rik | Adult male testis cDNA, RIKEN full-length enriched library, clone:4930579P08 prod | -6.69E-01 | 0.63 | 1.08E-02 | 0.99 |
| Rpl13         | ribosomal protein L13                                                             | 2.97E-01  | 1.23 | 1.08E-02 | 0.99 |
| BC002216      | cDNA sequence BC002216                                                            | -3.29E-01 | 0.80 | 1.08E-02 | 0.99 |
| Arpc3         | actin related protein 2/3 complex, subunit 3                                      | 4.57E-01  | 1.37 | 1.08E-02 | 0.98 |
| Ctsg          | cathepsin G                                                                       | -3.08E-01 | 0.81 | 1.08E-02 | 0.97 |
| Six4          | sine oculis-related homeobox 4 homolog (Drosophila)                               | -3.90E-01 | 0.76 | 1.08E-02 | 0.95 |
| Fxyd1         | FXDY domain-containing ion transport regulator 1                                  | -2.53E-01 | 0.84 | 1.08E-02 | 0.95 |
| Trfr2         | transferrin receptor 2                                                            | 3.82E-01  | 1.30 | 1.07E-02 | 0.95 |
| Lrg1          | leucine-rich alpha-2-glycoprotein 1                                               | 1.03E+00  | 2.04 | 1.08E-02 | 0.94 |
| Tsnax         | translin-associated factor X                                                      | -3.59E-01 | 0.78 | 1.11E-02 | 0.94 |
| 2210411G17Rik | RIKEN cDNA 2210411G17 gene                                                        | 3.21E-01  | 1.25 | 1.08E-02 | 0.94 |
| Bscl2         | Bernardinelli-Seip congenital lipodystrophy 2 homolog (human)                     | 4.44E-01  | 1.36 | 1.08E-02 | 0.92 |
| ApoE          | apolipoprotein E                                                                  | 4.31E-01  | 1.35 | 1.08E-02 | 0.91 |
| Map3k12       | mitogen activated protein kinase kinase kinase 12                                 | -3.94E-01 | 0.76 | 1.11E-02 | 0.90 |
| Aacs          | acetoacetyl-CoA synthetase                                                        | -4.68E-01 | 0.72 | 1.08E-02 | 0.89 |
| Mrpl1         | mitochondrial ribosomal protein L1                                                | -3.48E-01 | 0.79 | 1.16E-02 | 0.88 |
| 1700028P05Rik | RIKEN cDNA 1700028P05 gene                                                        | -3.08E-01 | 0.81 | 1.13E-02 | 0.88 |
| Zhx3          | zinc fingers and homeoboxes 3                                                     | -2.85E-01 | 0.82 | 1.13E-02 | 0.87 |
| Vegfa         | vascular endothelial growth factor A                                              | -4.12E-01 | 0.75 | 1.15E-02 | 0.87 |
| 1810036I24Rik | RIKEN cDNA 1810036I24 gene                                                        | -3.77E-01 | 0.77 | 1.13E-02 | 0.87 |
| BC026682      | cDNA sequence BC026682                                                            | -6.78E-01 | 0.62 | 1.13E-02 | 0.86 |



**Supplementary Table 1. Xpd<sup>TTD</sup> vs. WT at young age (3 months)**

|               |                                                                           |           |      |          |      |
|---------------|---------------------------------------------------------------------------|-----------|------|----------|------|
| Siat6         | sialyltransferase 6 (N-acetylglucosaminidase alpha 2,3-sialyltransferase) | 3.64E-01  | 1.29 | 1.13E-02 | 0.85 |
| 9430020E02Rik | RIKEN cDNA 9430020E02 gene                                                | -2.69E-01 | 0.83 | 1.13E-02 | 0.85 |
| Clk4          | CDC like kinase 4                                                         | -3.63E-01 | 0.78 | 1.14E-02 | 0.85 |
| Tfpi2         | tissue factor pathway inhibitor 2                                         | -4.65E-01 | 0.72 | 1.13E-02 | 0.83 |
| Cct8          | chaperonin subunit 8 (theta)                                              | 2.31E-01  | 1.17 | 1.16E-02 | 0.82 |
| 2510017J16Rik | RIKEN cDNA 2510017J16 gene                                                | -2.68E-01 | 0.83 | 1.19E-02 | 0.82 |
| Hpd           | 4-hydroxyphenylpyruvic acid dioxygenase                                   | 3.67E-01  | 1.29 | 1.14E-02 | 0.80 |
| C730032N17Rik | RIKEN cDNA C730032N17 gene                                                | -3.22E-01 | 0.80 | 1.19E-02 | 0.79 |
| Igf2          | insulin-like growth factor 2                                              | -2.98E-01 | 0.81 | 1.19E-02 | 0.78 |
| 9530046H09Rik | RIKEN cDNA 9530046H09 gene                                                | 2.49E-01  | 1.19 | 1.19E-02 | 0.78 |
| 2310010M20Rik | RIKEN cDNA 2310010M20 gene                                                | -4.63E-01 | 0.73 | 1.19E-02 | 0.77 |
| Surb7         | SRB7 (suppressor of RNA polymerase B) homolog (S. cerevisiae)             | -3.59E-01 | 0.78 | 1.19E-02 | 0.76 |
| Emid1         | EMI domain containing 1                                                   | 2.28E-01  | 1.17 | 1.19E-02 | 0.75 |
| Zfp235        | zinc finger protein 235                                                   | 4.35E-01  | 1.35 | 1.19E-02 | 0.74 |
| Cx3cl1        | chemokine (C-X3-C motif) ligand 1                                         | -2.77E-01 | 0.83 | 1.27E-02 | 0.73 |
| Banp          | Btg3 associated nuclear protein                                           | -4.30E-01 | 0.74 | 1.19E-02 | 0.73 |
| DXImx38e      | DNA segment, Chr X, Immunex 38, expressed                                 | 2.57E-01  | 1.20 | 1.25E-02 | 0.73 |
| Ltbp2         | latent transforming growth factor beta binding protein 2                  | -2.85E-01 | 0.82 | 1.27E-02 | 0.72 |
| Serpina3n     | serine (or cysteine) proteinase inhibitor, clade A, member 3N             | 5.29E-01  | 1.44 | 1.24E-02 | 0.70 |
| 2610036L13Rik | RIKEN cDNA 2610036L13 gene                                                | -2.82E-01 | 0.82 | 1.26E-02 | 0.70 |
| 6030458C11Rik | RIKEN cDNA 6030458C11 gene                                                | -2.38E-01 | 0.85 | 1.27E-02 | 0.70 |
| 1200016C12Rik | RIKEN cDNA 1200016C12 gene                                                | -3.51E-01 | 0.78 | 1.32E-02 | 0.70 |
| Capns1        | calpain, small subunit 1                                                  | 3.18E-01  | 1.25 | 1.28E-02 | 0.67 |
| D19Etd721e    | DNA segment, Chr 19, ERATO Doi 721, expressed                             | -4.33E-01 | 0.74 | 1.27E-02 | 0.67 |
| Serpina3k     | serine (or cysteine) proteinase inhibitor, clade A, member 3K             | 2.89E-01  | 1.22 | 1.32E-02 | 0.66 |
| Fgf9          | fibroblast growth factor 9                                                | -3.41E-01 | 0.79 | 1.30E-02 | 0.66 |
| Osbp2         | oxysterol binding protein 2                                               | -3.31E-01 | 0.79 | 1.32E-02 | 0.64 |
| 4933407C03Rik | RIKEN cDNA 4933407C03 gene                                                | -3.06E-01 | 0.81 | 1.28E-02 | 0.63 |
| Cldn2         | claudin 2                                                                 | -3.99E-01 | 0.76 | 1.32E-02 | 0.62 |
| Dpm1          | dolichol-phosphate (beta-D) mannosyltransferase 1                         | -2.45E-01 | 0.84 | 1.28E-02 | 0.62 |
| 1810004F21Rik | RIKEN cDNA 1810004F21 gene                                                | 4.50E-01  | 1.37 | 1.32E-02 | 0.60 |
| Ube2j2        | ubiquitin-conjugating enzyme E2, J2 homolog (yeast)                       | -2.94E-01 | 0.82 | 1.32E-02 | 0.59 |
| Aldh3a2       | aldehyde dehydrogenase family 3, subfamily A2                             | -3.13E-01 | 0.80 | 1.32E-02 | 0.59 |
| Ugt2a1        | UDP glycosyltransferase 2 family, polypeptide A1                          | -3.60E-01 | 0.78 | 1.41E-02 | 0.57 |
| 0610009I22Rik | RIKEN cDNA 0610009I22 gene                                                | -4.11E-01 | 0.75 | 1.39E-02 | 0.57 |
| 9030416H16Rik | RIKEN cDNA 9030416H16 gene                                                | 3.17E-01  | 1.25 | 1.38E-02 | 0.56 |
| 1810033B17Rik | RIKEN cDNA 1810033B17 gene                                                | 8.98E-01  | 1.86 | 1.39E-02 | 0.54 |

**Supplementary Table 1. Xpd<sup>TTD</sup> vs. WT at young age (3 months)**

|               |                                                                                  |           |      |          |      |
|---------------|----------------------------------------------------------------------------------|-----------|------|----------|------|
| Tde1          | tumor differentially expressed 1                                                 | 4.87E-01  | 1.40 | 1.37E-02 | 0.54 |
| 0610008C08Rik | RIKEN cDNA 0610008C08 gene                                                       | 6.58E-01  | 1.58 | 1.37E-02 | 0.54 |
| 3230401D17Rik | RIKEN cDNA 3230401D17 gene                                                       | -2.73E-01 | 0.83 | 1.39E-02 | 0.53 |
| Pkd1l2        | polycystic kidney disease 1 like 2                                               | -3.80E-01 | 0.77 | 1.37E-02 | 0.52 |
| Rad54l        | RAD54 like ( <i>S. cerevisiae</i> )                                              | -3.29E-01 | 0.80 | 1.37E-02 | 0.52 |
| Kdelr2        | KDEL (Lys-Asp-Glu-Leu) endoplasmic reticulum protein retention receptor 2        | -2.42E-01 | 0.85 | 1.39E-02 | 0.51 |
| Vmp           | vesicular membrain protein p24                                                   | 3.40E-01  | 1.27 | 1.41E-02 | 0.51 |
| Mapk1         | mitogen activated protein kinase 1                                               | -3.03E-01 | 0.81 | 1.44E-02 | 0.51 |
| Clp1          | cardiac lineage protein 1                                                        | 2.64E-01  | 1.20 | 1.42E-02 | 0.49 |
| F2            | coagulation factor II                                                            | 2.80E-01  | 1.21 | 1.44E-02 | 0.49 |
| Zw10          | ZW10 homolog ( <i>Drosophila</i> ), centromere/kinetochore protein               | 5.74E-01  | 1.49 | 1.41E-02 | 0.49 |
| Pabpc1        | poly A binding protein, cytoplasmic 1                                            | 2.19E-01  | 1.16 | 1.42E-02 | 0.48 |
| Abcd2         | ATP-binding cassette, sub-family D (ALD), member 2                               | -2.19E-01 | 0.86 | 1.42E-02 | 0.47 |
| BC005537      | cDNA sequence BC005537                                                           | -3.09E-01 | 0.81 | 1.40E-02 | 0.46 |
| BC062922      | cDNA sequence BC062922                                                           | 4.43E-01  | 1.36 | 1.58E-02 | 0.44 |
| Pxmp4         | peroxisomal membrane protein 4                                                   | -3.87E-01 | 0.76 | 1.45E-02 | 0.43 |
| 2610301K12Rik | RIKEN cDNA 2610301K12 gene                                                       | -2.91E-01 | 0.82 | 1.49E-02 | 0.43 |
| Acacb         | acetyl-Coenzyme A carboxylase beta                                               | -2.74E-01 | 0.83 | 1.54E-02 | 0.43 |
| 4931405B09Rik | RIKEN cDNA 4931405B09 gene                                                       | 4.76E-01  | 1.39 | 1.43E-02 | 0.43 |
| 4933411G06Rik | RIKEN cDNA 4933411G06 gene                                                       | -4.41E-01 | 0.74 | 1.53E-02 | 0.41 |
| Prdm1         | PR domain containing 1, with ZNF domain                                          | -3.73E-01 | 0.77 | 1.55E-02 | 0.40 |
| 4933424M23Rik | RIKEN cDNA 4933424M23 gene                                                       | -3.33E-01 | 0.79 | 1.58E-02 | 0.38 |
| 4921537D05Rik | RIKEN cDNA 4921537D05 gene                                                       | -2.14E-01 | 0.86 | 1.53E-02 | 0.37 |
| 2210013O21Rik | Adult male stomach cDNA, RIKEN full-length enriched library, clone:2210013O21 p  | -2.77E-01 | 0.83 | 1.51E-02 | 0.37 |
| F10           | coagulation factor X                                                             | 3.19E-01  | 1.25 | 1.55E-02 | 0.36 |
| D15Ert417e    | DNA segment, Chr 15, ERATO Doi 417, expressed                                    | -2.74E-01 | 0.83 | 1.59E-02 | 0.36 |
| Cnfn          | CDNA clone MGC:70195 IMAGE:30293557, complete cds                                | -3.05E-01 | 0.81 | 1.55E-02 | 0.35 |
| Glg1          | golgi apparatus protein 1                                                        | 4.27E-01  | 1.34 | 1.58E-02 | 0.35 |
| Mga           | MAX gene associated                                                              | 3.07E-01  | 1.24 | 1.61E-02 | 0.34 |
| Tcf7l2        | transcription factor 7-like 2, T-cell specific, HMG-box                          | -3.41E-01 | 0.79 | 1.60E-02 | 0.32 |
| Fuca          | fucosidase, alpha-L- 1, tissue                                                   | 3.05E-01  | 1.24 | 1.55E-02 | 0.31 |
| B930089N03Rik | 10 days neonate cerebellum cDNA, RIKEN full-length enriched library, clone:B9300 | -3.93E-01 | 0.76 | 1.63E-02 | 0.31 |
| Mbnl1         | muscleblind-like 1 ( <i>Drosophila</i> )                                         | -3.98E-01 | 0.76 | 1.55E-02 | 0.31 |
| 5830417I10Rik | RIKEN cDNA 5830417I10 gene                                                       | 4.26E-01  | 1.34 | 1.61E-02 | 0.29 |
| Scrn2         | secernin 2                                                                       | 6.94E-01  | 1.62 | 1.70E-02 | 0.29 |
| Snn           | stannin                                                                          | -2.97E-01 | 0.81 | 1.59E-02 | 0.28 |
| Ltbr          | lymphotoxin B receptor                                                           | 3.56E-01  | 1.28 | 1.66E-02 | 0.28 |

**Supplementary Table 1. Xpd<sup>TTD</sup> vs. WT at young age (3 months)**

|               |                                                                                         |           |      |          |      |
|---------------|-----------------------------------------------------------------------------------------|-----------|------|----------|------|
| Rpl18         | ribosomal protein L18                                                                   | 2.89E-01  | 1.22 | 1.67E-02 | 0.27 |
| A230102O21Rik | Adult male hypothalamus cDNA, RIKEN full-length enriched library, clone:A230102O21      | -2.23E-01 | 0.86 | 1.62E-02 | 0.26 |
| Cdh23         | cadherin 23 (otocadherin)                                                               | -2.38E-01 | 0.85 | 1.63E-02 | 0.24 |
| Cd2           | CD2 antigen                                                                             | -2.27E-01 | 0.85 | 1.63E-02 | 0.24 |
| Wbp2          | WW domain binding protein 2                                                             | 2.53E-01  | 1.19 | 1.70E-02 | 0.22 |
| 4930524O08Rik | Adult male testis cDNA, RIKEN full-length enriched library, clone:4930524O08 prod       | -2.80E-01 | 0.82 | 1.65E-02 | 0.20 |
| Art1          | ADP-ribosyltransferase 1                                                                | -4.01E-01 | 0.76 | 1.79E-02 | 0.19 |
| 1700016D06Rik | RIKEN cDNA 1700016D06 gene                                                              | -4.24E-01 | 0.75 | 1.72E-02 | 0.17 |
| D530031A16Rik | 13 days embryo stomach cDNA, RIKEN full-length enriched library, clone:D530031A16       | -3.22E-01 | 0.80 | 1.79E-02 | 0.17 |
| 2610019I03Rik | RIKEN cDNA 2610019I03 gene                                                              | -2.61E-01 | 0.83 | 1.84E-02 | 0.16 |
| Tnip1         | TNFAIP3 interacting protein 1                                                           | -2.74E-01 | 0.83 | 1.79E-02 | 0.16 |
| C130090K23Rik | RIKEN cDNA C130090K23 gene                                                              | -2.11E-01 | 0.86 | 1.72E-02 | 0.16 |
| 2610016F04Rik | RIKEN cDNA 2610016F04 gene                                                              | -4.37E-01 | 0.74 | 1.79E-02 | 0.15 |
| Tgfb1         | transforming growth factor, beta 1                                                      | -3.21E-01 | 0.80 | 1.81E-02 | 0.14 |
| 4933404I11Rik | Adult male testis cDNA, RIKEN full-length enriched library, clone:4933404I11 produ      | -3.61E-01 | 0.78 | 1.84E-02 | 0.14 |
| Ocil          | osteoclast inhibitory lectin                                                            | -5.63E-01 | 0.68 | 1.84E-02 | 0.14 |
| 6430605C03Rik | RIKEN cDNA 6430605C03 gene (6430605C03Rik), mRNA                                        | -3.52E-01 | 0.78 | 1.79E-02 | 0.13 |
| 2810055E05Rik | RIKEN cDNA 2810055E05 gene                                                              | -3.14E-01 | 0.80 | 1.79E-02 | 0.12 |
| Rps3          | ribosomal protein S3                                                                    | 3.50E-01  | 1.27 | 1.79E-02 | 0.11 |
| Tmprss5       | transmembrane protease, serine 5 (spinesin)                                             | 5.13E-01  | 1.43 | 1.83E-02 | 0.11 |
| 5730407K14Rik | RIKEN cDNA 5730407K14 gene                                                              | 5.69E-01  | 1.48 | 1.83E-02 | 0.10 |
| Tcf20         | transcription factor 20                                                                 | -4.08E-01 | 0.75 | 1.89E-02 | 0.10 |
| D5Ert363e     | DNA segment, Chr 5, ERATO Doi 363, expressed                                            | -2.61E-01 | 0.83 | 1.84E-02 | 0.10 |
| 6330414G02Rik | Adult male medulla oblongata cDNA, RIKEN full-length enriched library, clone:6330414G02 | -2.76E-01 | 0.83 | 1.83E-02 | 0.09 |
| Ehox          | ES cell derived homeobox containing gene                                                | -3.42E-01 | 0.79 | 1.89E-02 | 0.09 |
| Crk           | v-crk sarcoma virus CT10 oncogene homolog (avian)                                       | -2.79E-01 | 0.82 | 1.87E-02 | 0.07 |
| Agl           | amylo-1,6-glucosidase, 4-alpha-glucanotransferase                                       | 3.76E-01  | 1.30 | 1.84E-02 | 0.07 |
| Eprs          | glutamyl-prolyl-tRNA synthetase                                                         | 2.70E-01  | 1.21 | 1.86E-02 | 0.06 |
| Itih1         | inter-alpha trypsin inhibitor, heavy chain 1                                            | 3.56E-01  | 1.28 | 1.88E-02 | 0.05 |
| 4930578I06Rik | RIKEN cDNA 4930578I06 gene                                                              | -3.74E-01 | 0.77 | 1.88E-02 | 0.05 |
| 2810428J06Rik | RIKEN cDNA 2810428J06 gene                                                              | -3.03E-01 | 0.81 | 1.87E-02 | 0.04 |
| Pcbd          | 6-pyruvoyl-tetrahydropterin synthase/dimerization cofactor of hepatocyte nuclear fac    | -2.51E-01 | 0.84 | 1.85E-02 | 0.04 |
| Mapk8ip3      | mitogen-activated protein kinase 8 interacting protein 3                                | -2.45E-01 | 0.84 | 1.93E-02 | 0.04 |
| 1700030K09Rik | RIKEN cDNA 1700030K09 gene                                                              | -2.58E-01 | 0.84 | 1.94E-02 | 0.04 |
| Sirt6         | sirtuin 6 (silent mating type information regulation 2, homolog) 6 (S. cerevisiae)      | -2.54E-01 | 0.84 | 1.89E-02 | 0.03 |
| Cp            | ceruloplasmin                                                                           | 3.07E-01  | 1.24 | 1.92E-02 | 0.03 |
| 3110005P07Rik | RIKEN cDNA 3110005P07 gene                                                              | -2.50E-01 | 0.84 | 1.87E-02 | 0.03 |

**Supplementary Table 1. Xpd<sup>TTD</sup> vs. WT at young age (3 months)**

|               |                                     |           |      |          |      |
|---------------|-------------------------------------|-----------|------|----------|------|
| 2310026P19Rik | RIKEN cDNA 2310026P19 gene          | 4.02E-01  | 1.32 | 1.92E-02 | 0.03 |
| Rorc          | RAR-related orphan receptor gamma   | -2.22E-01 | 0.86 | 1.92E-02 | 0.03 |
| 1200016G03Rik | RIKEN cDNA 1200016G03 gene          | -2.30E-01 | 0.85 | 1.88E-02 | 0.03 |
| 1110067L22Rik | RIKEN cDNA 1110067L22 gene          | -3.03E-01 | 0.81 | 1.94E-02 | 0.02 |
| Mrps35        | mitochondrial ribosomal protein S35 | 2.72E-01  | 1.21 | 1.88E-02 | 0.02 |
| 1700036D21Rik | RIKEN cDNA 1700036D21 gene          | -3.14E-01 | 0.80 | 1.92E-02 | 0.02 |
| 4632407F12Rik | RIKEN cDNA 4632407F12 gene          | -2.80E-01 | 0.82 | 1.93E-02 | 0.01 |
| 1700010A17Rik | RIKEN cDNA 1700010A17 gene          | 4.32E-01  | 1.35 | 1.92E-02 | 0.00 |
