# Supplementary material for: Homeostatic Imbalance between Apoptosis and Cell Renewal in the Liver of Premature Aging XpdTTD Mice
Source: PubMed Central journal article supplement (PMC2396506; doi:10.1371/journal.pone.0002346), 2008-06-11
Supplement: pone.0002346.s003.pdf [file pone.0002346.s003.pdf]

**Supplementary Table 2. Xpd<sup>TTD</sup> vs. WT at old age (20 months)**

| Gene          | Description                                                                                         | Log2 Ratio | Fold Change | P value  | B value |
|---------------|-----------------------------------------------------------------------------------------------------|------------|-------------|----------|---------|
| Cyp2b9        | cytochrome P450, family 2, subfamily b, polypeptide 9                                               | -2.84E+00  | 0.14        | 1.31E-17 | 38.66   |
| Cyp2a4        | cytochrome P450, family 2, subfamily a, polypeptide 4                                               | 2.42E+00   | 5.33        | 3.85E-17 | 37.35   |
| Egfr          | epidermal growth factor receptor                                                                    | 1.22E+00   | 2.34        | 2.34E-16 | 35.39   |
| Serpina6      | serine (or cysteine) proteinase inhibitor, clade A, member 6                                        | -1.50E+00  | 0.35        | 2.34E-16 | 35.39   |
| Lgals1        | lectin, galactose binding, soluble 1                                                                | -1.23E+00  | 0.43        | 2.23E-15 | 32.91   |
| 3930401B19Rik | RIKEN cDNA 3930401B19 gene                                                                          | 2.05E+00   | 4.14        | 3.44E-15 | 32.59   |
| Got1          | glutamate oxaloacetate transaminase 1, soluble                                                      | 1.59E+00   | 3.01        | 3.47E-15 | 32.44   |
| Igfbp1        | insulin-like growth factor binding protein 1                                                        | 2.82E+00   | 7.06        | 3.47E-15 | 32.39   |
| 1810015C04Rik | RIKEN cDNA 1810015C04 gene                                                                          | 1.22E+00   | 2.34        | 4.48E-15 | 32.07   |
| Cyp2b13       | Cytochrome P450, family 2, subfamily b, polypeptide 13 (Cyp2b13), mRNA                              | -1.80E+00  | 0.29        | 7.35E-15 | 31.43   |
| B2m           | beta-2 microglobulin                                                                                | -9.46E-01  | 0.52        | 2.94E-14 | 30.06   |
| Slc7a2        | solute carrier family 7 (cationic amino acid transporter, y+ system), member 2                      | 1.06E+00   | 2.09        | 3.19E-14 | 29.82   |
| 2310066F23Rik | Adult male tongue cDNA, RIKEN full-length enriched library, clone:2310066F23 product:unknown E      | 1.42E+00   | 2.68        | 3.19E-14 | 29.61   |
| Aldh1a7       | aldehyde dehydrogenase family 1, subfamily A7                                                       | -1.61E+00  | 0.33        | 3.74E-14 | 29.55   |
| Fabp1         | fatty acid binding protein 1, liver                                                                 | -2.36E+00  | 0.20        | 3.96E-14 | 29.49   |
| Cyp2b20       | cytochrome P450, family 2, subfamily b, polypeptide 20                                              | -1.79E+00  | 0.29        | 3.96E-14 | 29.40   |
| Sfrp1         | secreted frizzled-related sequence protein 1                                                        | 1.43E+00   | 2.69        | 4.65E-14 | 29.17   |
| Leap2         | liver-expressed antimicrobial peptide 2                                                             | -1.16E+00  | 0.45        | 5.77E-14 | 28.95   |
| Fmo3          | flavin containing monooxygenase 3                                                                   | 2.45E+00   | 5.45        | 7.53E-14 | 28.61   |
| Scp2          | sterol carrier protein 2, liver                                                                     | -1.05E+00  | 0.48        | 1.38E-13 | 27.98   |
| 2310032D16Rik | RIKEN cDNA 2310032D16 gene                                                                          | 9.37E-01   | 1.91        | 1.74E-13 | 27.70   |
| Slc4a1ap      | solute carrier family 4 (anion exchanger), member 1, adaptor protein                                | 8.26E-01   | 1.77        | 1.81E-13 | 27.65   |
| Por           | P450 (cytochrome) oxidoreductase                                                                    | 1.23E+00   | 2.34        | 2.06E-13 | 27.45   |
| Pcbd          | 6-pyruvoyl-tetrahydropterin synthase/dimerization cofactor of hepatocyte nuclear factor 1 alpha (TC | -8.41E-01  | 0.56        | 2.26E-13 | 27.32   |
| 6430559E15Rik | RIKEN cDNA 6430559E15 gene                                                                          | 1.38E+00   | 2.60        | 3.08E-13 | 26.92   |
| G6pc          | glucose-6-phosphatase, catalytic                                                                    | 1.15E+00   | 2.22        | 2.70E-13 | 26.91   |
| Ebpl          | emopamil binding protein-like                                                                       | -9.45E-01  | 0.52        | 3.32E-13 | 26.81   |
| Lepr          | leptin receptor                                                                                     | 1.12E+00   | 2.18        | 3.26E-13 | 26.80   |
| 1110030N17Rik | RIKEN cDNA 1110030N17 gene                                                                          | 1.10E+00   | 2.15        | 4.75E-13 | 26.39   |
| 1110028A07Rik | RIKEN cDNA 1110028A07 gene                                                                          | -1.11E+00  | 0.46        | 4.75E-13 | 26.39   |
| D14Ert449e    | DNA segment, Chr 14, ERATO Doi 449, expressed                                                       | -1.02E+00  | 0.49        | 6.30E-13 | 26.04   |
| Aldh1a1       | aldehyde dehydrogenase family 1, subfamily A1                                                       | -1.21E+00  | 0.43        | 7.02E-13 | 25.94   |
| Tubb2         | tubulin, beta 2                                                                                     | -1.11E+00  | 0.46        | 7.69E-13 | 25.84   |
| Cth           | cystathionase (cystathionine gamma-lyase)                                                           | 7.51E-01   | 1.68        | 8.56E-13 | 25.67   |
| Gzmn          | granzyme N                                                                                          | 1.04E+00   | 2.06        | 1.09E-12 | 25.40   |
| Cai           | calcium binding protein, intestinal                                                                 | -9.29E-01  | 0.53        | 1.09E-12 | 25.37   |
| Cd5l          | CD5 antigen-like                                                                                    | -9.06E-01  | 0.53        | 1.35E-12 | 25.14   |
| Igj           | immunoglobulin joining chain                                                                        | -1.08E+00  | 0.47        | 1.35E-12 | 25.11   |
| Pecr          | peroxisomal trans-2-enoyl-CoA reductase                                                             | -7.51E-01  | 0.59        | 1.61E-12 | 24.92   |
| Elovl5        | ELOVL family member 5, elongation of long chain fatty acids (yeast)                                 | -9.24E-01  | 0.53        | 1.61E-12 | 24.91   |

**Supplementary Table 2. Xpd<sup>TTD</sup> vs. WT at old age (20 months)**

|               |                                                                                           |           |      |          |       |
|---------------|-------------------------------------------------------------------------------------------|-----------|------|----------|-------|
| Gadd45g       | growth arrest and DNA-damage-inducible 45 gamma                                           | 7.78E-01  | 1.71 | 1.70E-12 | 24.82 |
| Sh3d4         | SH3 domain protein 4                                                                      | 8.42E-01  | 1.79 | 1.76E-12 | 24.77 |
| AU041707      | expressed sequence AU041707                                                               | 8.69E-01  | 1.83 | 1.90E-12 | 24.66 |
| 1110032O16Rik | RIKEN cDNA 1110032O16 gene                                                                | 7.89E-01  | 1.73 | 2.37E-12 | 24.43 |
| Hmgcl         | 3-hydroxy-3-methylglutaryl-Coenzyme A lyase                                               | -6.33E-01 | 0.64 | 2.60E-12 | 24.32 |
| Lamp1         | lysosomal membrane glycoprotein 1                                                         | -1.05E+00 | 0.48 | 2.76E-12 | 24.22 |
| Lipc          | lipase, hepatic                                                                           | -8.86E-01 | 0.54 | 2.76E-12 | 24.19 |
| 1200015M12Rik | RIKEN cDNA 1200015M12 gene                                                                | 1.23E+00  | 2.35 | 2.82E-12 | 24.17 |
| Gnas          | GNAS (guanine nucleotide binding protein, alpha stimulating) complex locus                | -8.48E-01 | 0.56 | 2.87E-12 | 24.13 |
| Pim3          | proviral integration site 3                                                               | 9.08E-01  | 1.88 | 3.54E-12 | 23.91 |
| BC010711      | Unknown (protein for MGC:6827)                                                            | 1.83E+00  | 3.57 | 3.65E-12 | 23.86 |
| 5830418G11Rik | RIKEN cDNA 5830418G11 gene                                                                | 8.85E-01  | 1.85 | 3.93E-12 | 23.76 |
| Stmn4         | stathmin-like 4                                                                           | 1.03E+00  | 2.04 | 4.91E-12 | 23.52 |
| Sdc4          | syndecan 4                                                                                | 6.77E-01  | 1.60 | 4.97E-12 | 23.49 |
| Cyct          | cytochrome c, testis                                                                      | 7.71E-01  | 1.71 | 5.05E-12 | 23.46 |
| Serpib1a      | serine (or cysteine) proteinase inhibitor, clade B, member 1a                             | -1.03E+00 | 0.49 | 5.26E-12 | 23.40 |
| Phlda1        | pleckstrin homology-like domain, family A, member 1                                       | -6.79E-01 | 0.62 | 5.89E-12 | 23.27 |
| Adfp          | adipose differentiation related protein                                                   | -9.28E-01 | 0.53 | 6.05E-12 | 23.23 |
| Hmgcs2        | 3-hydroxy-3-methylglutaryl-Coenzyme A synthase 2                                          | -8.14E-01 | 0.57 | 6.49E-12 | 23.13 |
| Socs2         | suppressor of cytokine signaling 2                                                        | 1.25E+00  | 2.37 | 6.49E-12 | 23.12 |
| Temt          | thioether S-methyltransferase                                                             | -8.86E-01 | 0.54 | 6.95E-12 | 23.04 |
| AA959742      | expressed sequence AA959742                                                               | -6.57E-01 | 0.63 | 6.95E-12 | 23.02 |
| Rapgef4       | Rap guanine nucleotide exchange factor (GEF) 4                                            | 7.60E-01  | 1.69 | 7.10E-12 | 22.98 |
| Ddit4         | DNA-damage-inducible transcript 4                                                         | 1.24E+00  | 2.35 | 7.93E-12 | 22.85 |
| Fdps          | farnesyl diphosphate synthetase                                                           | -1.00E+00 | 0.50 | 7.93E-12 | 22.85 |
| Dbi           | diazepam binding inhibitor                                                                | -1.05E+00 | 0.48 | 8.82E-12 | 22.72 |
| Sth2          | sulfotransferase, hydroxysteroid preferring 2                                             | -1.49E+00 | 0.36 | 9.42E-12 | 22.63 |
| Hgfac         | hepatocyte growth factor activator                                                        | -7.76E-01 | 0.58 | 9.42E-12 | 22.62 |
| Ppp2r4        | protein phosphatase 2A, regulatory subunit B (PR 53)                                      | 9.88E-01  | 1.98 | 9.42E-12 | 22.61 |
| Bdh           | 3-hydroxybutyrate dehydrogenase (heart, mitochondrial)                                    | -8.62E-01 | 0.55 | 1.01E-11 | 22.51 |
| 5033425B17Rik | RIKEN cDNA 5033425B17 gene                                                                | -7.08E-01 | 0.61 | 1.01E-11 | 22.50 |
| Hnf4          | hepatic nuclear factor 4                                                                  | 5.97E-01  | 1.51 | 1.01E-11 | 22.50 |
| Clecsf13      | C-type (calcium dependent, carbohydrate recognition domain) lectin, superfamily member 13 | -5.65E-01 | 0.68 | 1.03E-11 | 22.47 |
| Dci           | dodecenoyl-Coenzyme A delta isomerase (3,2 trans-enoyl-Coenzyme A isomerase)              | -6.58E-01 | 0.63 | 1.05E-11 | 22.44 |
| 4930438M06Rik | RIKEN cDNA 4930438M06 gene                                                                | 6.72E-01  | 1.59 | 1.45E-11 | 22.09 |
| Brp           | BRCA1 associated protein                                                                  | 6.45E-01  | 1.56 | 1.45E-11 | 22.07 |
| 0610006H10Rik | RIKEN cDNA 0610006H10 gene                                                                | -8.57E-01 | 0.55 | 1.45E-11 | 22.06 |
| 1700019G17Rik | RIKEN cDNA 1700019G17 gene                                                                | -9.60E-01 | 0.51 | 1.45E-11 | 22.05 |
| Btg3          | B-cell translocation gene 3                                                               | 6.94E-01  | 1.62 | 1.45E-11 | 22.05 |
| Btg2          | B-cell translocation gene 2, anti-proliferative                                           | 1.12E+00  | 2.17 | 1.90E-11 | 21.77 |
| Cspg3         | chondroitin sulfate proteoglycan 3                                                        | 9.78E-01  | 1.97 | 1.98E-11 | 21.70 |

**Supplementary Table 2. Xpd<sup>TTD</sup> vs. WT at old age (20 months)**

|               |                                                                                               |           |      |          |       |
|---------------|-----------------------------------------------------------------------------------------------|-----------|------|----------|-------|
| 5730438N18Rik | RIKEN cDNA 5730438N18 gene                                                                    | 9.69E-01  | 1.96 | 2.01E-11 | 21.69 |
| Mapkapk2      | MAP kinase-activated protein kinase 2                                                         | 7.02E-01  | 1.63 | 2.16E-11 | 21.60 |
| Gas6          | growth arrest specific 6                                                                      | -6.71E-01 | 0.63 | 2.20E-11 | 21.58 |
| Ifrd1         | interferon-related developmental regulator 1                                                  | 9.19E-01  | 1.89 | 2.38E-11 | 21.48 |
| Agl           | amylo-1,6-glucosidase, 4-alpha-glucanotransferase                                             | 6.26E-01  | 1.54 | 2.38E-11 | 21.47 |
| Ubd           | ubiquitin D                                                                                   | -7.21E-01 | 0.61 | 2.55E-11 | 21.38 |
| 1110032O22Rik | 18-day embryo whole body cDNA, RIKEN full-length enriched library, clone:1110032O22 product:R | -6.26E-01 | 0.65 | 2.55E-11 | 21.37 |
| Sec14l2       | SEC14-like 2 ( <i>S. cerevisiae</i> )                                                         | -7.22E-01 | 0.61 | 2.66E-11 | 21.33 |
| 4933433C11Rik | RIKEN cDNA 4933433C11 gene                                                                    | 7.35E-01  | 1.66 | 3.00E-11 | 21.20 |
| Ly6d          | lymphocyte antigen 6 complex, locus D                                                         | -9.68E-01 | 0.51 | 3.38E-11 | 21.07 |
| Pter          | phosphotriesterase related                                                                    | -6.96E-01 | 0.62 | 3.40E-11 | 21.05 |
| Cyp2c40       | cytochrome P450, family 2, subfamily c, polypeptide 40                                        | -8.85E-01 | 0.54 | 3.54E-11 | 20.99 |
| 1110018M03Rik | RIKEN cDNA 1110018M03 gene                                                                    | 8.85E-01  | 1.85 | 3.54E-11 | 20.98 |
| Tmsb4x        | thymosin, beta 4, X chromosome                                                                | -8.02E-01 | 0.57 | 3.69E-11 | 20.94 |
| Spp1          | secreted phosphoprotein 1                                                                     | -6.16E-01 | 0.65 | 3.72E-11 | 20.90 |
| 4931405B09Rik | RIKEN cDNA 4931405B09 gene                                                                    | 9.31E-01  | 1.91 | 3.88E-11 | 20.87 |
| Lcat          | lecithin cholesterol acyltransferase                                                          | 9.82E-01  | 1.98 | 4.23E-11 | 20.76 |
| Egr1          | early growth response 1                                                                       | 6.89E-01  | 1.61 | 4.42E-11 | 20.72 |
| Aplp1         | amyloid beta (A4) precursor-like protein 1                                                    | 6.68E-01  | 1.59 | 5.03E-11 | 20.58 |
| H3f3a         | H3 histone, family 3A                                                                         | -5.95E-01 | 0.66 | 5.20E-11 | 20.54 |
| Idb2          | inhibitor of DNA binding 2                                                                    | -5.26E-01 | 0.69 | 5.35E-11 | 20.47 |
| Car3          | carbonic anhydrase 3                                                                          | -1.45E+00 | 0.36 | 5.69E-11 | 20.40 |
| 2610101J03Rik | RIKEN cDNA 2610101J03 gene                                                                    | 1.40E+00  | 2.64 | 6.50E-11 | 20.28 |
| Mbl1          | mannose binding lectin, liver (A)                                                             | -7.90E-01 | 0.58 | 6.50E-11 | 20.26 |
| 1700018O18Rik | RIKEN cDNA 1700018O18 gene                                                                    | 7.21E-01  | 1.65 | 6.54E-11 | 20.25 |
| Abca6         | ATP-binding cassette, sub-family A (ABC1), member 6                                           | 7.69E-01  | 1.70 | 7.15E-11 | 20.16 |
| Mup1          | major urinary protein 1                                                                       | -8.95E-01 | 0.54 | 7.15E-11 | 20.14 |
| Grip1         | glutamate receptor interacting protein 1                                                      | 6.51E-01  | 1.57 | 7.31E-11 | 20.10 |
| Gck           | glucokinase                                                                                   | -8.52E-01 | 0.55 | 7.50E-11 | 20.09 |
| Psme1         | proteasome (prosome, macropain) 28 subunit, alpha                                             | -6.11E-01 | 0.65 | 7.60E-11 | 20.06 |
| Cyp2j5        | cytochrome P450, family 2, subfamily j, polypeptide 5                                         | -7.49E-01 | 0.59 | 7.71E-11 | 20.02 |
| Serpina3n     | serine (or cysteine) proteinase inhibitor, clade A, member 3N                                 | 7.51E-01  | 1.68 | 8.04E-11 | 19.97 |
| Hdac9         | histone deacetylase 9                                                                         | 1.11E+00  | 2.17 | 8.24E-11 | 19.95 |
| Bphl          | biphenyl hydrolase-like (serine hydrolase; breast epithelial mucin-associated antigen)        | -6.74E-01 | 0.63 | 8.45E-11 | 19.91 |
| Zfp120        | zinc finger protein 120                                                                       | -9.78E-01 | 0.51 | 8.45E-11 | 19.91 |
| Idh1          | isocitrate dehydrogenase 1 (NADP+), soluble                                                   | -7.59E-01 | 0.59 | 8.45E-11 | 19.90 |
| Adk           | adenosine kinase                                                                              | -5.47E-01 | 0.68 | 8.69E-11 | 19.85 |
| Npff          | neuropeptide FF-amide peptide precursor                                                       | 1.28E+00  | 2.43 | 8.72E-11 | 19.84 |
| Slc38a4       | solute carrier family 38, member 4                                                            | 7.21E-01  | 1.65 | 1.05E-10 | 19.66 |
| 1700060E18Rik | RIKEN cDNA 1700060E18 gene                                                                    | 6.73E-01  | 1.59 | 1.06E-10 | 19.64 |
| AK004057      |                                                                                               | 7.41E-01  | 1.67 | 1.13E-10 | 19.57 |

**Supplementary Table 2. Xpd<sup>TTD</sup> vs. WT at old age (20 months)**

|               |                                                                                                 |           |      |          |       |
|---------------|-------------------------------------------------------------------------------------------------|-----------|------|----------|-------|
| C230080I20Rik | RIKEN cDNA C230080I20 gene                                                                      | 6.17E-01  | 1.53 | 1.28E-10 | 19.43 |
| Rnaset2       | ribonuclease T2                                                                                 | -6.68E-01 | 0.63 | 1.36E-10 | 19.36 |
| Sc5d          | sterol-C5-desaturase (fungal ERG3, delta-5-desaturase) homolog (S. cerevisae)                   | -7.36E-01 | 0.60 | 1.37E-10 | 19.35 |
| Csda          | cold shock domain protein A                                                                     | -5.51E-01 | 0.68 | 1.37E-10 | 19.32 |
| 1500031I19Rik | RIKEN cDNA 1500031I19 gene, mRNA (cDNA clone IMAGE:6593004), with apparent retained intron      | 7.07E-01  | 1.63 | 1.37E-10 | 19.32 |
| Tm7sf2        | transmembrane 7 superfamily member 2                                                            | -5.91E-01 | 0.66 | 1.41E-10 | 19.28 |
| Inhbe         | inhibin beta E                                                                                  | -5.57E-01 | 0.68 | 1.46E-10 | 19.25 |
| Cd160         | CD160 antigen                                                                                   | -6.49E-01 | 0.64 | 1.47E-10 | 19.23 |
| Snrpn         | small nuclear ribonucleoprotein N                                                               | -5.82E-01 | 0.67 | 1.51E-10 | 19.20 |
| 6720477E09Rik | RIKEN cDNA 6720477E09 gene                                                                      | 9.65E-01  | 1.95 | 1.59E-10 | 19.15 |
| Asl           | argininosuccinate lyase                                                                         | 6.41E-01  | 1.56 | 1.64E-10 | 19.10 |
| Gtpbp1        | GTP binding protein 1                                                                           | 1.04E+00  | 2.06 | 1.67E-10 | 19.08 |
| 1700013L23Rik | RIKEN cDNA 1700013L23 gene                                                                      | -7.03E-01 | 0.61 | 1.64E-10 | 19.07 |
| 2310051M13Rik | RIKEN cDNA 2310051M13 gene                                                                      | 9.87E-01  | 1.98 | 1.64E-10 | 19.06 |
| Gpld1         | glycosylphosphatidylinositol specific phospholipase D1                                          | 6.93E-01  | 1.62 | 1.67E-10 | 19.03 |
| Succlg2       | succinate-Coenzyme A ligase, GDP-forming, beta subunit                                          | -4.48E-01 | 0.73 | 1.68E-10 | 19.01 |
| Ngfr          | nerve growth factor receptor (TNFR superfamily, member 16)                                      | 5.91E-01  | 1.51 | 1.74E-10 | 19.00 |
| 1810008B01Rik | 10 day old male pancreas cDNA, RIKEN full-length enriched library, clone:1810008B01 product:unl | 5.50E-01  | 1.46 | 1.74E-10 | 18.99 |
| AF032968      | Strain C3H/HeN mRNA preferentially expressed in LPS-normoresponsive macrophages                 | -9.37E-01 | 0.52 | 1.74E-10 | 18.98 |
| Abhd9         | abhydrolase domain containing 9                                                                 | 6.33E-01  | 1.55 | 1.86E-10 | 18.89 |
| Tde1          | tumor differentially expressed 1                                                                | 5.95E-01  | 1.51 | 1.91E-10 | 18.86 |
| Ctsl          | cathepsin L                                                                                     | 9.77E-01  | 1.97 | 2.11E-10 | 18.77 |
| A930008G19Rik | RIKEN cDNA A930008G19 gene                                                                      | 5.31E-01  | 1.44 | 2.12E-10 | 18.76 |
| Perp          | PERP, TP53 apoptosis effector                                                                   | -5.25E-01 | 0.69 | 2.17E-10 | 18.73 |
| Aldh1b1       | aldehyde dehydrogenase 1 family, member B1                                                      | -6.28E-01 | 0.65 | 2.16E-10 | 18.73 |
| 0610006F02Rik | RIKEN cDNA 0610006F02 gene                                                                      | -5.98E-01 | 0.66 | 2.16E-10 | 18.72 |
| Ndufa6        | NADH dehydrogenase (ubiquinone) 1 alpha subcomplex, 6 (B14)                                     | -5.98E-01 | 0.66 | 2.18E-10 | 18.70 |
| AK009577      |                                                                                                 | 5.83E-01  | 1.50 | 2.22E-10 | 18.65 |
| Lpin2         | lipin 2                                                                                         | 6.07E-01  | 1.52 | 2.37E-10 | 18.61 |
| Hao3          | hydroxyacid oxidase (glycolate oxidase) 3                                                       | -6.91E-01 | 0.62 | 2.37E-10 | 18.59 |
| D10Jhu81e     | DNA segment, Chr 10, Johns Hopkins University 81 expressed                                      | -4.97E-01 | 0.71 | 2.35E-10 | 18.59 |
| D730001G18Rik | RIKEN cDNA D730001G18 gene                                                                      | 9.09E-01  | 1.88 | 2.44E-10 | 18.55 |
| 4921509F24Rik | RIKEN cDNA 4921509F24 gene                                                                      | 1.01E+00  | 2.02 | 2.49E-10 | 18.54 |
| Gclc          | glutamate-cysteine ligase, catalytic subunit                                                    | -6.17E-01 | 0.65 | 2.44E-10 | 18.53 |
| Fcna          | ficolin A                                                                                       | -6.62E-01 | 0.63 | 2.82E-10 | 18.40 |
| Lpin1         | lipin 1                                                                                         | 1.31E+00  | 2.48 | 2.90E-10 | 18.32 |
| Wrb           | tryptophan rich basic protein                                                                   | 7.98E-01  | 1.74 | 3.02E-10 | 18.31 |
| Pros1         | protein S (alpha)                                                                               | 6.30E-01  | 1.55 | 3.28E-10 | 18.23 |
| Zfp114        | zinc finger protein 114                                                                         | 6.00E-01  | 1.52 | 3.23E-10 | 18.22 |
| Acaa1         | acetyl-Coenzyme A acyltransferase 1                                                             | -6.70E-01 | 0.63 | 3.43E-10 | 18.15 |
| 0610011F06Rik | RIKEN cDNA 0610011F06 gene                                                                      | -5.35E-01 | 0.69 | 3.43E-10 | 18.15 |

**Supplementary Table 2. Xpd<sup>TTD</sup> vs. WT at old age (20 months)**

|               |                                                                                                    |           |      |          |       |
|---------------|----------------------------------------------------------------------------------------------------|-----------|------|----------|-------|
| Pmscl2        | polymyositis/scleroderma autoantigen 2                                                             | -6.75E-01 | 0.63 | 3.37E-10 | 18.14 |
| Ccnl1         | cyclin L1                                                                                          | 5.79E-01  | 1.49 | 3.45E-10 | 18.12 |
| Ppargc1a      | peroxisome proliferative activated receptor, gamma, coactivator 1 alpha                            | 6.64E-01  | 1.58 | 3.43E-10 | 18.11 |
| Junb          | Jun-B oncogene                                                                                     | 7.20E-01  | 1.65 | 3.42E-10 | 18.11 |
| Sertad2       | SERTA domain containing 2                                                                          | 6.40E-01  | 1.56 | 3.48E-10 | 18.10 |
| 0610039D01Rik | RIKEN cDNA 0610039D01 gene                                                                         | 5.41E-01  | 1.46 | 3.49E-10 | 18.10 |
| Dio1          | deiodinase, iodothyronine, type I                                                                  | -7.01E-01 | 0.62 | 3.50E-10 | 18.09 |
| Nipsnap1      | 4-nitrophenylphosphatase domain and non-neuronal SNAP25-like protein homolog 1 (C. elegans)        | -6.12E-01 | 0.65 | 3.67E-10 | 18.02 |
| 2310057D15Rik | RIKEN cDNA 2310057D15 gene                                                                         | 6.16E-01  | 1.53 | 3.61E-10 | 18.02 |
| 2010003K11Rik | RIKEN cDNA 2010003K11 gene                                                                         | -6.97E-01 | 0.62 | 3.63E-10 | 18.01 |
| Tfpi2         | tissue factor pathway inhibitor 2                                                                  | -5.34E-01 | 0.69 | 3.79E-10 | 17.99 |
| Armet         | arginine-rich, mutated in early stage tumors                                                       | -4.53E-01 | 0.73 | 3.83E-10 | 17.93 |
| Alad          | aminolevulinatase, delta-, dehydratase                                                             | -4.43E-01 | 0.74 | 3.83E-10 | 17.93 |
| Lrg1          | leucine-rich alpha-2-glycoprotein 1                                                                | 8.34E-01  | 1.78 | 3.85E-10 | 17.92 |
| 2810040O04Rik | RIKEN cDNA 2810040O04 gene                                                                         | 1.16E+00  | 2.23 | 3.93E-10 | 17.91 |
| 4930519G04Rik | RIKEN cDNA 4930519G04 gene                                                                         | 8.30E-01  | 1.78 | 4.13E-10 | 17.89 |
| Serpina3c     | serine (or cysteine) proteinase inhibitor, clade A, member 3C                                      | 6.58E-01  | 1.58 | 4.03E-10 | 17.87 |
| AU018778      | expressed sequence AU018778                                                                        | -9.44E-01 | 0.52 | 4.15E-10 | 17.87 |
| 2210409B01Rik | RIKEN cDNA 2210409B01 gene                                                                         | 1.11E+00  | 2.15 | 4.37E-10 | 17.81 |
| Mbl2          | mannose binding lectin, serum (C)                                                                  | -8.95E-01 | 0.54 | 4.37E-10 | 17.78 |
| Glul          | glutamate-ammonia ligase (glutamine synthase)                                                      | -5.26E-01 | 0.69 | 4.37E-10 | 17.76 |
| 2500002L14Rik | RIKEN cDNA 2500002L14 gene                                                                         | 7.46E-01  | 1.68 | 4.44E-10 | 17.75 |
| Slc25a22      | solute carrier family 25 (mitochondrial carrier: glutamate), member 22                             | 7.15E-01  | 1.64 | 4.54E-10 | 17.75 |
| Ocil          | osteoclast inhibitory lectin                                                                       | -5.83E-01 | 0.67 | 4.78E-10 | 17.67 |
| Nr1h4         | nuclear receptor subfamily 1, group H, member 4                                                    | -4.36E-01 | 0.74 | 4.78E-10 | 17.66 |
| 9430059D04Rik | RIKEN cDNA 9430059D04 gene                                                                         | -5.49E-01 | 0.68 | 4.84E-10 | 17.65 |
| Ms4a11        | membrane-spanning 4-domains, subfamily A, member 11                                                | 5.74E-01  | 1.49 | 4.85E-10 | 17.62 |
| Gc            | group specific component                                                                           | -7.53E-01 | 0.59 | 4.84E-10 | 17.61 |
| 4632412E09Rik | RIKEN cDNA 4632412E09 gene                                                                         | 7.42E-01  | 1.67 | 5.27E-10 | 17.54 |
| 4933436N17Rik | Adult male testis cDNA, RIKEN full-length enriched library, clone:4933436N17 product:unclassifiabl | 5.54E-01  | 1.47 | 5.53E-10 | 17.51 |
| Adcy3         | adenylate cyclase 3                                                                                | 6.82E-01  | 1.60 | 5.49E-10 | 17.51 |
| 0610009A07Rik | RIKEN cDNA 0610009A07 gene                                                                         | -5.46E-01 | 0.68 | 5.53E-10 | 17.48 |
| 1500032D16Rik | RIKEN cDNA 1500032D16 gene                                                                         | -5.55E-01 | 0.68 | 5.53E-10 | 17.48 |
| 2610524G09Rik | RIKEN cDNA 2610524G09 gene                                                                         | 1.14E+00  | 2.20 | 5.64E-10 | 17.45 |
| 4930522D07Rik | RIKEN cDNA 4930522D07 gene                                                                         | 5.46E-01  | 1.46 | 5.64E-10 | 17.45 |
| 9130410C08Rik | Adult male cecum cDNA, RIKEN full-length enriched library, clone:9130410C08 product:unclassifia    | 7.55E-01  | 1.69 | 5.69E-10 | 17.43 |
| Cml2          | camello-like 2                                                                                     | -5.47E-01 | 0.68 | 5.93E-10 | 17.40 |
| Slc16a10      | solute carrier family 16 (monocarboxylic acid transporters), member 10                             | 5.22E-01  | 1.44 | 6.24E-10 | 17.35 |
| Twist1        | twist gene homolog 1 (Drosophila)                                                                  | 5.61E-01  | 1.48 | 6.32E-10 | 17.30 |
| 2700063A19Rik | RIKEN cDNA 2700063A19 gene                                                                         | 5.26E-01  | 1.44 | 6.59E-10 | 17.29 |
| Ndfip1        | Nedd4 family interacting protein 1                                                                 | -5.24E-01 | 0.70 | 6.48E-10 | 17.27 |

**Supplementary Table 2. Xpd<sup>TTD</sup> vs. WT at old age (20 months)**

|               |                                                                                                 |           |      |          |       |
|---------------|-------------------------------------------------------------------------------------------------|-----------|------|----------|-------|
| Cldn2         | claudin 2                                                                                       | -5.01E-01 | 0.71 | 6.48E-10 | 17.27 |
| Nudt11        | nudix (nucleoside diphosphate linked moiety X)-type motif 11                                    | 1.32E+00  | 2.50 | 6.41E-10 | 17.26 |
| Calm1         | calmodulin 1                                                                                    | -5.47E-01 | 0.68 | 6.88E-10 | 17.19 |
| H2-Ab1        | histocompatibility 2, class II antigen A, beta 1                                                | -5.30E-01 | 0.69 | 7.20E-10 | 17.15 |
| 2610524G07Rik | RIKEN cDNA 2610524G07 gene                                                                      | -5.59E-01 | 0.68 | 7.56E-10 | 17.15 |
| Enpp3         | ectonucleotide pyrophosphatase/phosphodiesterase 3                                              | 8.16E-01  | 1.76 | 7.67E-10 | 17.11 |
| Lhx2          | LIM homeobox protein 2                                                                          | 8.72E-01  | 1.83 | 7.57E-10 | 17.08 |
| 1700020F09Rik | RIKEN cDNA 1700020F09 gene                                                                      | 7.09E-01  | 1.63 | 8.49E-10 | 16.99 |
| Ppara         | peroxisome proliferator activated receptor alpha                                                | -5.49E-01 | 0.68 | 8.49E-10 | 16.95 |
| Cyp4v3        | cytochrome P450, family 4, subfamily v, polypeptide 3                                           | -7.36E-01 | 0.60 | 8.79E-10 | 16.92 |
| Gdnf          | glial cell line derived neurotrophic factor                                                     | 5.27E-01  | 1.44 | 9.26E-10 | 16.84 |
| Es10          | esterase 10                                                                                     | -5.93E-01 | 0.66 | 9.26E-10 | 16.84 |
| Mknk2         | MAP kinase-interacting serine/threonine kinase 2                                                | 5.97E-01  | 1.51 | 1.01E-09 | 16.80 |
| Timd2         | T-cell immunoglobulin and mucin domain containing 2                                             | -6.44E-01 | 0.64 | 9.52E-10 | 16.80 |
| Abca3         | ATP-binding cassette, sub-family A (ABC1), member 3                                             | -5.04E-01 | 0.71 | 1.04E-09 | 16.74 |
| 9630013K17Rik | 16 days neonate cerebellum cDNA, RIKEN full-length enriched library, clone:9630013K17 product:1 | 7.37E-01  | 1.67 | 1.09E-09 | 16.71 |
| Agxt2l1       | alanine-glyoxylate aminotransferase 2-like 1                                                    | 7.88E-01  | 1.73 | 1.13E-09 | 16.65 |
| 5033425B17Rik | RIKEN cDNA 5033425B17 gene                                                                      | -5.02E-01 | 0.71 | 1.13E-09 | 16.65 |
| Kdr           | kinase insert domain protein receptor                                                           | 6.10E-01  | 1.53 | 1.11E-09 | 16.64 |
| Upp2          | uridine phosphorylase 2                                                                         | 4.67E-01  | 1.38 | 1.13E-09 | 16.62 |
| Rpl31         | ribosomal protein L31                                                                           | -5.76E-01 | 0.67 | 1.23E-09 | 16.52 |
| Apof          | apolipoprotein F                                                                                | -6.47E-01 | 0.64 | 1.31E-09 | 16.49 |
| Dlk1          | delta-like 1 homolog (Drosophila)                                                               | 8.07E-01  | 1.75 | 1.33E-09 | 16.48 |
| Cherp         | calcium homeostasis endoplasmic reticulum protein                                               | 5.89E-01  | 1.50 | 1.35E-09 | 16.40 |
| Arl4          | ADP-ribosylation factor-like 4                                                                  | 4.48E-01  | 1.36 | 1.35E-09 | 16.39 |
| Slc33a1       | solute carrier family 33 (acetyl-CoA transporter), member 1                                     | -4.83E-01 | 0.72 | 1.46E-09 | 16.36 |
| Serpinc1      | serine (or cysteine) proteinase inhibitor, clade C (antithrombin), member 1                     | -5.98E-01 | 0.66 | 1.45E-09 | 16.33 |
| Slc37a2       | solute carrier family 37 (glycerol-3-phosphate transporter), member 2                           | 7.87E-01  | 1.73 | 1.50E-09 | 16.32 |
| Uqcr          | ubiquinol-cytochrome c reductase (6.4kD) subunit                                                | -5.68E-01 | 0.67 | 1.56E-09 | 16.30 |
| 2310043J07Rik | RIKEN cDNA 2310043J07 gene                                                                      | 7.85E-01  | 1.72 | 1.69E-09 | 16.22 |
| Capza2        | capping protein (actin filament) muscle Z-line, alpha 2                                         | 5.54E-01  | 1.47 | 1.69E-09 | 16.15 |
| Nola2         | nucleolar protein family A, member 2                                                            | -1.09E+00 | 0.47 | 1.81E-09 | 16.13 |
| Hrsp12        | heat-responsive protein 12                                                                      | -6.86E-01 | 0.62 | 1.69E-09 | 16.11 |
| 1110036H21Rik | RIKEN cDNA 1110036H21 gene                                                                      | 4.78E-01  | 1.39 | 1.85E-09 | 16.04 |
| Grn           | granulin                                                                                        | 5.06E-01  | 1.42 | 1.92E-09 | 15.98 |
| Ly86          | lymphocyte antigen 86                                                                           | -6.40E-01 | 0.64 | 2.01E-09 | 15.95 |
| Sqle          | squalene epoxidase                                                                              | -7.43E-01 | 0.60 | 2.16E-09 | 15.87 |
| Lip1          | lysosomal acid lipase 1                                                                         | -4.42E-01 | 0.74 | 2.31E-09 | 15.82 |
| Pbef1         | pre-B-cell colony-enhancing factor 1                                                            | 6.10E-01  | 1.53 | 2.31E-09 | 15.81 |
| Tm4sf13       | transmembrane 4 superfamily member 13                                                           | 5.48E-01  | 1.46 | 2.33E-09 | 15.80 |
| 2310061G07Rik | RIKEN cDNA 2310061G07 gene                                                                      | 7.70E-01  | 1.70 | 2.33E-09 | 15.79 |

**Supplementary Table 2. Xpd<sup>TTD</sup> vs. WT at old age (20 months)**

|               |                                                                         |           |      |          |       |
|---------------|-------------------------------------------------------------------------|-----------|------|----------|-------|
| Rph3a         | rabphilin 3A                                                            | 6.16E-01  | 1.53 | 2.39E-09 | 15.78 |
| 1300013J15Rik | RIKEN cDNA 1300013J15 gene                                              | -4.71E-01 | 0.72 | 2.31E-09 | 15.77 |
| Cml1          | camello-like 1                                                          | -5.16E-01 | 0.70 | 2.33E-09 | 15.74 |
| Apoa2         | apolipoprotein A-II                                                     | -7.72E-01 | 0.59 | 2.50E-09 | 15.71 |
| Anxa11        | annexin A11                                                             | 5.63E-01  | 1.48 | 2.50E-09 | 15.69 |
| Rgs16         | regulator of G-protein signaling 16                                     | -5.32E-01 | 0.69 | 2.54E-09 | 15.67 |
| 1700020C07Rik | RIKEN cDNA 1700020C07 gene                                              | 4.87E-01  | 1.40 | 2.60E-09 | 15.66 |
| 1110008F13Rik | RIKEN cDNA 1110008F13 gene                                              | 5.23E-01  | 1.44 | 2.60E-09 | 15.62 |
| Semcap2       | semaF cytoplasmic domain associated protein 2                           | -5.67E-01 | 0.68 | 2.77E-09 | 15.60 |
| ORF9          | open reading frame 9                                                    | 6.81E-01  | 1.60 | 2.64E-09 | 15.60 |
| 5530401N06Rik | RIKEN cDNA 5530401N06                                                   | 4.71E-01  | 1.39 | 2.61E-09 | 15.60 |
| Aasdhppt      | aminoadipate-semialdehyde dehydrogenase-phosphopantetheinyl transferase | 6.12E-01  | 1.53 | 2.79E-09 | 15.57 |
| Fem1a         | feminization 1 homolog a (C. elegans)                                   | 4.59E-01  | 1.37 | 2.78E-09 | 15.56 |
| Ces1          | carboxylesterase 1                                                      | -4.71E-01 | 0.72 | 2.83E-09 | 15.56 |
| Gabra6        | gamma-aminobutyric acid (GABA-A) receptor, subunit alpha 6              | 5.26E-01  | 1.44 | 2.84E-09 | 15.52 |
| Olf56         | olfactory receptor 56                                                   | -5.93E-01 | 0.66 | 2.84E-09 | 15.52 |
| Pltp          | phospholipid transfer protein                                           | -6.49E-01 | 0.64 | 2.83E-09 | 15.51 |
| Gnb2-rs1      | guanine nucleotide binding protein, beta 2, related sequence 1          | 6.73E-01  | 1.59 | 2.79E-09 | 15.51 |
| Cebpb         | CCAAT/enhancer binding protein (C/EBP), beta                            | 4.28E-01  | 1.35 | 2.85E-09 | 15.51 |
| Pdlim1        | PDZ and LIM domain 1 (elfin)                                            | 5.15E-01  | 1.43 | 2.91E-09 | 15.45 |
| Pex19         | peroxisome biogenesis factor 19                                         | 4.64E-01  | 1.38 | 2.91E-09 | 15.45 |
| Igfbp4        | insulin-like growth factor binding protein 4                            | 5.11E-01  | 1.43 | 3.07E-09 | 15.45 |
| Aadac         | arylacetamide deacetylase (esterase)                                    | -6.87E-01 | 0.62 | 3.03E-09 | 15.44 |
| Usmg5         | upregulated during skeletal muscle growth 5                             | -5.25E-01 | 0.70 | 2.94E-09 | 15.42 |
| Hsd17b4       | hydroxysteroid (17-beta) dehydrogenase 4                                | -6.18E-01 | 0.65 | 3.07E-09 | 15.41 |
| Pdc           | phosducin                                                               | 8.30E-01  | 1.78 | 3.07E-09 | 15.40 |
| 9030617O03Rik | RIKEN cDNA 9030617O03 gene                                              | -5.35E-01 | 0.69 | 3.03E-09 | 15.39 |
| Cd79b         | CD79B antigen                                                           | -5.59E-01 | 0.68 | 3.17E-09 | 15.37 |
| 2600017J23Rik | RIKEN cDNA 2600017J23 gene                                              | -4.86E-01 | 0.71 | 3.20E-09 | 15.37 |
| 1110007L15Rik | RIKEN cDNA 1110007L15 gene                                              | 5.65E-01  | 1.48 | 3.23E-09 | 15.34 |
| Ube2v1        | Ubiquitin-conjugating enzyme E2 variant 1 (Ube2v1), mRNA                | 8.89E-01  | 1.85 | 3.29E-09 | 15.34 |
| 1810023F06Rik | RIKEN cDNA 1810023F06 gene                                              | -5.23E-01 | 0.70 | 3.23E-09 | 15.34 |
| Gpx6          | glutathione peroxidase 6                                                | 6.54E-01  | 1.57 | 3.23E-09 | 15.32 |
| Akr1c20       | aldo-keto reductase family 1, member C20                                | -8.96E-01 | 0.54 | 3.28E-09 | 15.29 |
| 2310014H01Rik | RIKEN cDNA 2310014H01 gene                                              | 6.21E-01  | 1.54 | 3.46E-09 | 15.24 |
| Agmat         | agmatine ureohydrolase (agmatinase)                                     | -6.84E-01 | 0.62 | 3.54E-09 | 15.21 |
| Vcam1         | vascular cell adhesion molecule 1                                       | -5.31E-01 | 0.69 | 3.54E-09 | 15.21 |
| Phf12         | PHD finger protein 12                                                   | 7.66E-01  | 1.70 | 3.74E-09 | 15.19 |
| 4930467M19Rik | RIKEN cDNA 4930467M19 gene                                              | 7.36E-01  | 1.67 | 3.76E-09 | 15.16 |
| Pdzk2         | PDZ domain containing 2                                                 | 5.92E-01  | 1.51 | 3.80E-09 | 15.15 |
| Fads1         | fatty acid desaturase 1                                                 | -5.92E-01 | 0.66 | 3.76E-09 | 15.13 |

**Supplementary Table 2. Xpd<sup>TTD</sup> vs. WT at old age (20 months)**

|               |                                                                                                    |           |      |          |       |
|---------------|----------------------------------------------------------------------------------------------------|-----------|------|----------|-------|
| 4933433F19Rik | Adult male testis cDNA, RIKEN full-length enriched library, clone:4933433F19 product:unclassifiabl | 4.90E-01  | 1.40 | 4.07E-09 | 15.06 |
| Fkbp2         | FK506 binding protein 2                                                                            | -4.65E-01 | 0.72 | 4.22E-09 | 15.05 |
| 1700034O15Rik | RIKEN cDNA 1700034O15 gene                                                                         | 6.39E-01  | 1.56 | 4.07E-09 | 15.04 |
| Apoc1         | apolipoprotein C-I                                                                                 | -1.04E+00 | 0.49 | 4.05E-09 | 15.02 |
| 1810011O10Rik | RIKEN cDNA 1810011O10 gene                                                                         | -4.26E-01 | 0.74 | 4.38E-09 | 15.01 |
| 5830477G23Rik | RIKEN cDNA 5830477G23 gene                                                                         | 6.98E-01  | 1.62 | 4.42E-09 | 14.99 |
| Proz          | protein Z, vitamin K-dependent plasma glycoprotein                                                 | -6.64E-01 | 0.63 | 4.62E-09 | 14.96 |
| Comt          | catechol-O-methyltransferase                                                                       | -4.32E-01 | 0.74 | 4.39E-09 | 14.96 |
| Gstz1         | glutathione transferase zeta 1 (maleylacetoacetate isomerase)                                      | -5.55E-01 | 0.68 | 4.41E-09 | 14.94 |
| 2310008M10Rik | RIKEN cDNA 2310008M10 gene                                                                         | -5.91E-01 | 0.66 | 4.41E-09 | 14.92 |
| Aqp8          | aquaporin 8                                                                                        | -5.45E-01 | 0.69 | 4.59E-09 | 14.92 |
| 1300019J08Rik | RIKEN cDNA 1300019J08 gene                                                                         | -5.56E-01 | 0.68 | 4.64E-09 | 14.91 |
| Cyp4f14       | cytochrome P450, family 4, subfamily f, polypeptide 14                                             | -4.62E-01 | 0.73 | 4.55E-09 | 14.90 |
| Hsd11b1       | hydroxysteroid 11-beta dehydrogenase 1                                                             | -6.40E-01 | 0.64 | 4.55E-09 | 14.89 |
| Cabp5         | calcium binding protein 5                                                                          | 4.55E-01  | 1.37 | 4.73E-09 | 14.87 |
| Nsep1         | nuclease sensitive element binding protein 1                                                       | 5.92E-01  | 1.51 | 4.81E-09 | 14.85 |
| D3Ucla1       | DNA segment, Chr 3, University of California at Los Angeles 1                                      | -4.85E-01 | 0.71 | 4.82E-09 | 14.82 |
| Ankrd17       | ankyrin repeat domain 17                                                                           | 5.81E-01  | 1.50 | 5.02E-09 | 14.81 |
| C030014K22Rik | RIKEN cDNA C030014K22 gene                                                                         | 4.26E-01  | 1.34 | 5.07E-09 | 14.78 |
| Tns           | tensin                                                                                             | 4.46E-01  | 1.36 | 5.29E-09 | 14.76 |
| 4921509E07Rik | RIKEN cDNA 4921509E07 gene                                                                         | 5.20E-01  | 1.43 | 5.32E-09 | 14.75 |
| H2-Eb1        | histocompatibility 2, class II antigen E beta                                                      | -6.46E-01 | 0.64 | 5.71E-09 | 14.66 |
| Otc           | ornithine transcarbamylase                                                                         | -6.94E-01 | 0.62 | 5.43E-09 | 14.66 |
| 3110043O21Rik | RIKEN cDNA 3110043O21 gene                                                                         | 6.46E-01  | 1.57 | 5.67E-09 | 14.64 |
| BC021917      | cDNA sequence BC021917                                                                             | -5.07E-01 | 0.70 | 5.98E-09 | 14.64 |
| Ilk           | integrin linked kinase                                                                             | -4.66E-01 | 0.72 | 5.79E-09 | 14.63 |
| Txn1          | thioredoxin 1                                                                                      | -5.26E-01 | 0.69 | 5.55E-09 | 14.63 |
| Samsn1        | SAM domain, SH3 domain and nuclear localisation signals, 1                                         | 5.74E-01  | 1.49 | 6.04E-09 | 14.61 |
| Fxyd2         | FXYP domain-containing ion transport regulator 2                                                   | -5.76E-01 | 0.67 | 6.04E-09 | 14.60 |
| Rpl19         | ribosomal protein L19                                                                              | -4.78E-01 | 0.72 | 5.90E-09 | 14.60 |
| Cyp3a11       | cytochrome P450, family 3, subfamily a, polypeptide 11                                             | -4.98E-01 | 0.71 | 6.16E-09 | 14.55 |
| Slc12a4       | solute carrier family 12, member 4                                                                 | -5.38E-01 | 0.69 | 6.30E-09 | 14.49 |
| Echdc1        | enoyl Coenzyme A hydratase domain containing 1                                                     | -4.92E-01 | 0.71 | 6.31E-09 | 14.49 |
| Phf1          | putative homeodomain transcription factor 1                                                        | 5.05E-01  | 1.42 | 6.38E-09 | 14.46 |
| B930011H20Rik | RIKEN cDNA B930011H20 gene                                                                         | 4.93E-01  | 1.41 | 6.57E-09 | 14.46 |
| Fads3         | fatty acid desaturase 3                                                                            | 4.51E-01  | 1.37 | 6.67E-09 | 14.45 |
| Bhmt2         | betaine-homocysteine methyltransferase 2                                                           | -4.94E-01 | 0.71 | 6.59E-09 | 14.42 |
| Fgfr3         | fibroblast growth factor receptor 3                                                                | -4.73E-01 | 0.72 | 7.02E-09 | 14.42 |
| 4933407C03Rik | RIKEN cDNA 4933407C03 gene                                                                         | 5.94E-01  | 1.51 | 7.22E-09 | 14.38 |
| Slc19a2       | solute carrier family 19 (thiamine transporter), member 2                                          | 3.63E-01  | 1.29 | 6.92E-09 | 14.38 |
| 1600019D15Rik | RIKEN cDNA 1600019D15 gene                                                                         | 7.02E-01  | 1.63 | 7.66E-09 | 14.36 |



**Supplementary Table 2. Xpd<sup>TTD</sup> vs. WT at old age (20 months)**

|               |                                                                                                |           |      |          |       |
|---------------|------------------------------------------------------------------------------------------------|-----------|------|----------|-------|
| Syn1          | synapsin I                                                                                     | -5.68E-01 | 0.67 | 7.78E-09 | 14.31 |
| 1700009P03Rik | RIKEN cDNA 1700009P03 gene                                                                     | 5.14E-01  | 1.43 | 7.76E-09 | 14.29 |
| Icos          | inducible T-cell co-stimulator                                                                 | 4.27E-01  | 1.34 | 7.68E-09 | 14.29 |
| 3110049J23Rik | RIKEN cDNA 3110049J23 gene                                                                     | -6.40E-01 | 0.64 | 7.68E-09 | 14.28 |
| Nfic          | nuclear factor I/C                                                                             | -3.78E-01 | 0.77 | 7.78E-09 | 14.23 |
| Epb4.9        | erythrocyte protein band 4.9                                                                   | 4.79E-01  | 1.39 | 7.78E-09 | 14.23 |
| Slc38a4       | solute carrier family 38, member 4                                                             | 3.67E-01  | 1.29 | 7.76E-09 | 14.21 |
| Pklr          | pyruvate kinase liver and red blood cell                                                       | -4.45E-01 | 0.73 | 7.78E-09 | 14.20 |
| Atp5j2        | ATP synthase, H <sup>+</sup> transporting, mitochondrial F0 complex, subunit f, isoform 2      | -5.54E-01 | 0.68 | 8.18E-09 | 14.16 |
| Gfra1         | glial cell line derived neurotrophic factor family receptor alpha 1                            | 4.15E-01  | 1.33 | 8.41E-09 | 14.14 |
| Tmsb10        | thymosin, beta 10                                                                              | -8.69E-01 | 0.55 | 8.44E-09 | 14.14 |
| Dnaja3        | DnaJ (Hsp40) homolog, subfamily A, member 3                                                    | 4.19E-01  | 1.34 | 8.83E-09 | 14.13 |
| Rpl26         | ribosomal protein L26                                                                          | -4.52E-01 | 0.73 | 8.63E-09 | 14.12 |
| Igfbp7        | insulin-like growth factor binding protein 7                                                   | -5.27E-01 | 0.69 | 8.44E-09 | 14.10 |
| Cd44          | CD44 antigen                                                                                   | -4.51E-01 | 0.73 | 8.83E-09 | 14.08 |
| Nfia          | nuclear factor I/A                                                                             | 4.07E-01  | 1.33 | 8.83E-09 | 14.07 |
| Ndufa10       | NADH dehydrogenase (ubiquinone) 1 alpha subcomplex 10                                          | -4.01E-01 | 0.76 | 9.46E-09 | 14.01 |
| Zdhhc20       | zinc finger, DHHC domain containing 20                                                         | 3.74E-01  | 1.30 | 1.01E-08 | 13.93 |
| Rpl36al       | ribosomal protein L36a-like                                                                    | -4.32E-01 | 0.74 | 1.05E-08 | 13.90 |
| 2310061N23Rik | RIKEN cDNA 2310061N23 gene                                                                     | -5.38E-01 | 0.69 | 1.09E-08 | 13.88 |
| Aldh2         | aldehyde dehydrogenase 2, mitochondrial                                                        | -3.91E-01 | 0.76 | 1.06E-08 | 13.84 |
| Sast          | syntrophin associated serine/threonine kinase                                                  | 4.60E-01  | 1.38 | 1.19E-08 | 13.77 |
| Fasn          | fatty acid synthase                                                                            | -3.95E-01 | 0.76 | 1.18E-08 | 13.75 |
| 4631422O05Rik | RIKEN cDNA 4631422O05 gene                                                                     | -5.45E-01 | 0.69 | 1.25E-08 | 13.74 |
| 3110038O15Rik | 10 days neonate cerebellum cDNA, RIKEN full-length enriched library, clone:B930029M01 product: | 3.84E-01  | 1.30 | 1.25E-08 | 13.70 |
| Shfdg1        | split hand/foot deleted gene 1                                                                 | -4.34E-01 | 0.74 | 1.27E-08 | 13.70 |
| 2610040L17Rik | RIKEN cDNA 2610040L17 gene                                                                     | 6.50E-01  | 1.57 | 1.26E-08 | 13.69 |
| Car6          | carbonic anhydrase 6                                                                           | 5.55E-01  | 1.47 | 1.26E-08 | 13.69 |
| Rps13         | ribosomal protein S13                                                                          | -4.64E-01 | 0.73 | 1.23E-08 | 13.66 |
| Mfap5         | microfibrillar associated protein 5                                                            | 5.66E-01  | 1.48 | 1.29E-08 | 13.66 |
| Rad23a        | RAD23a homolog (S. cerevisiae)                                                                 | -4.52E-01 | 0.73 | 1.34E-08 | 13.64 |
| Bcl7b         | B-cell CLL/lymphoma 7B                                                                         | 7.33E-01  | 1.66 | 1.30E-08 | 13.62 |
| Slc30a1       | solute carrier family 30 (zinc transporter), member 1                                          | 4.09E-01  | 1.33 | 1.33E-08 | 13.62 |
| Slc25a15      | solute carrier family 25 (mitochondrial carrier; ornithine transporter), member 15             | 4.80E-01  | 1.39 | 1.36E-08 | 13.62 |
| 0610011104Rik | RIKEN cDNA 0610011104 gene                                                                     | -4.82E-01 | 0.72 | 1.36E-08 | 13.60 |
| Mutyh         | mutY homolog (E. coli)                                                                         | 6.45E-01  | 1.56 | 1.43E-08 | 13.58 |
| Clgn          | calmegin                                                                                       | -5.41E-01 | 0.69 | 1.55E-08 | 13.57 |
| Arcn1         | archain 1                                                                                      | -3.51E-01 | 0.78 | 1.38E-08 | 13.53 |
| Grim19        | genes associated with retinoid-IFN-induced mortality 19                                        | -4.15E-01 | 0.75 | 1.40E-08 | 13.52 |
| Igf1r         | insulin-like growth factor I receptor                                                          | 5.25E-01  | 1.44 | 1.48E-08 | 13.51 |
| H2-Aa         | histocompatibility 2, class II antigen A, alpha                                                | -4.23E-01 | 0.75 | 1.53E-08 | 13.48 |

**Supplementary Table 2. Xpd<sup>TTD</sup> vs. WT at old age (20 months)**

|               |                                                                                           |           |      |          |       |
|---------------|-------------------------------------------------------------------------------------------|-----------|------|----------|-------|
| Fmo2          | flavin containing monooxygenase 2                                                         | 4.41E-01  | 1.36 | 1.51E-08 | 13.45 |
| 4933440H19Rik | RIKEN cDNA 4933440H19 gene                                                                | 8.01E-01  | 1.74 | 1.65E-08 | 13.38 |
| Kcnn1         | potassium intermediate/small conductance calcium-activated channel, subfamily N, member 1 | 6.40E-01  | 1.56 | 1.68E-08 | 13.37 |
| Pip5k2c       | phosphatidylinositol-4-phosphate 5-kinase, type II, gamma                                 | 8.74E-01  | 1.83 | 1.65E-08 | 13.36 |
| Mpz1l         | myelin protein zero-like 1                                                                | 5.54E-01  | 1.47 | 1.68E-08 | 13.30 |
| Ppia          | peptidylprolyl isomerase A                                                                | -3.80E-01 | 0.77 | 1.68E-08 | 13.29 |
| BC004004      | cDNA sequence BC004004                                                                    | -3.59E-01 | 0.78 | 1.72E-08 | 13.29 |
| Krt2-8        | keratin complex 2, basic, gene 8                                                          | -4.24E-01 | 0.75 | 1.78E-08 | 13.28 |
| Dnajc5        | DnaJ (Hsp40) homolog, subfamily C, member 5                                               | 5.26E-01  | 1.44 | 1.78E-08 | 13.27 |
| 2810007J24Rik | RIKEN cDNA 2810007J24 gene                                                                | -6.19E-01 | 0.65 | 1.82E-08 | 13.27 |
| Sec61b        | Sec61 beta subunit                                                                        | -4.18E-01 | 0.75 | 1.77E-08 | 13.26 |
| Apoc4         | apolipoprotein C-IV                                                                       | -4.14E-01 | 0.75 | 1.74E-08 | 13.24 |
| 9030425C21Rik | RIKEN cDNA 9030425C21 gene                                                                | 4.45E-01  | 1.36 | 1.88E-08 | 13.23 |
| Fus           | fusion, derived from t(12;16) malignant liposarcoma (human)                               | 6.13E-01  | 1.53 | 1.82E-08 | 13.21 |
| ApoH          | apolipoprotein H                                                                          | -4.00E-01 | 0.76 | 1.86E-08 | 13.19 |
| C1r           | complement component 1, r subcomponent                                                    | -4.51E-01 | 0.73 | 1.88E-08 | 13.18 |
| Ndufc1        | NADH dehydrogenase (ubiquinone) 1, subcomplex unknown, 1                                  | -3.93E-01 | 0.76 | 1.94E-08 | 13.18 |
| Dnahc5        | dynein, axonemal, heavy chain 5                                                           | 6.81E-01  | 1.60 | 1.97E-08 | 13.17 |
| F730014I05Rik | RIKEN cDNA F730014I05 gene                                                                | 4.86E-01  | 1.40 | 1.99E-08 | 13.16 |
| B130055D15Rik | RIKEN cDNA B130055D15 gene                                                                | 5.20E-01  | 1.43 | 1.97E-08 | 13.16 |
| Tpst2         | protein-tyrosine sulfotransferase 2                                                       | -7.04E-01 | 0.61 | 1.96E-08 | 13.15 |
| Fkbp4         | FK506 binding protein 4                                                                   | -4.30E-01 | 0.74 | 1.88E-08 | 13.14 |
| Akt1          | thymoma viral proto-oncogene 1                                                            | 3.50E-01  | 1.27 | 2.01E-08 | 13.12 |
| Tcfcp2l3      | transcription factor CP2-like 3                                                           | 4.97E-01  | 1.41 | 2.15E-08 | 13.07 |
| Asb12         | ankyrin repeat and SOCS box-containing protein 12                                         | 5.78E-01  | 1.49 | 2.10E-08 | 13.07 |
| Sqstm1        | sequestosome 1                                                                            | 5.01E-01  | 1.41 | 2.15E-08 | 13.07 |
| Krt1-19       | keratin complex 1, acidic, gene 19                                                        | -3.88E-01 | 0.76 | 2.11E-08 | 13.06 |
| Irak1bp1      | interleukin-1 receptor-associated kinase 1 binding protein 1                              | 5.14E-01  | 1.43 | 2.13E-08 | 13.06 |
| Htr1a         | 5-hydroxytryptamine (serotonin) receptor 1A                                               | 4.43E-01  | 1.36 | 2.20E-08 | 13.05 |
| Rpl30         | ribosomal protein L30                                                                     | -4.73E-01 | 0.72 | 2.11E-08 | 13.01 |
| Bace2         | beta-site APP-cleaving enzyme 2                                                           | 7.53E-01  | 1.69 | 2.23E-08 | 13.00 |
| Tslp          | thymic stromal lymphopoietin                                                              | 4.63E-01  | 1.38 | 2.34E-08 | 12.97 |
| Prlr          | prolactin receptor                                                                        | -4.24E-01 | 0.75 | 2.32E-08 | 12.96 |
| Grp58         | glucose regulated protein                                                                 | -4.38E-01 | 0.74 | 2.40E-08 | 12.95 |
| Ube2h         | ubiquitin-conjugating enzyme E2H                                                          | 4.21E-01  | 1.34 | 2.40E-08 | 12.94 |
| Sdf2l1        | stromal cell-derived factor 2-like 1                                                      | -4.95E-01 | 0.71 | 2.42E-08 | 12.94 |
| Rps7          | ribosomal protein S7                                                                      | -4.82E-01 | 0.72 | 2.34E-08 | 12.91 |
| 1700036D21Rik | RIKEN cDNA 1700036D21 gene                                                                | 6.89E-01  | 1.61 | 2.52E-08 | 12.90 |
| Zfp2          | zinc finger protein, multitype 2                                                          | -4.97E-01 | 0.71 | 2.40E-08 | 12.90 |
| Tsrc1         | thrombospondin repeat containing 1                                                        | -1.08E+00 | 0.47 | 2.40E-08 | 12.87 |
| Krtcap2       | keratinocyte associated protein 2                                                         | -3.93E-01 | 0.76 | 2.44E-08 | 12.86 |

**Supplementary Table 2. Xpd<sup>TTD</sup> vs. WT at old age (20 months)**

|               |                                                                                                |           |      |          |       |
|---------------|------------------------------------------------------------------------------------------------|-----------|------|----------|-------|
| Dncl2a        | dynein, cytoplasmic, light chain 2A                                                            | -4.24E-01 | 0.75 | 2.60E-08 | 12.81 |
| 2900027G03Rik | RIKEN cDNA 2900027G03 gene                                                                     | 6.37E-01  | 1.56 | 2.64E-08 | 12.81 |
| Skil          | SKI-like                                                                                       | 4.30E-01  | 1.35 | 2.70E-08 | 12.79 |
| Slc37a4       | solute carrier family 37 (glycerol-6-phosphate transporter), member 4                          | 4.00E-01  | 1.32 | 2.62E-08 | 12.77 |
| Stk16         | serine/threonine kinase 16                                                                     | -3.98E-01 | 0.76 | 2.70E-08 | 12.76 |
| Arfp2         | ADP-ribosylation factor interacting protein 2                                                  | 5.14E-01  | 1.43 | 2.68E-08 | 12.76 |
| 3110069A13Rik | RIKEN cDNA 3110069A13 gene                                                                     | 4.78E-01  | 1.39 | 2.68E-08 | 12.76 |
| Lypla1        | lysophospholipase 1 [Mus musculus]                                                             | 6.94E-01  | 1.62 | 2.83E-08 | 12.75 |
| Herpud1       | homocysteine-inducible, endoplasmic reticulum stress-inducible, ubiquitin-like domain member 1 | 4.80E-01  | 1.39 | 2.80E-08 | 12.74 |
| Vkorc1        | vitamin K epoxide reductase complex, subunit 1                                                 | -3.19E-01 | 0.80 | 2.71E-08 | 12.73 |
| S100a11       | S100 calcium binding protein A11 (calizzarin)                                                  | -5.43E-01 | 0.69 | 2.81E-08 | 12.70 |
| Adams10       | a disintegrin-like and metalloprotease (repolysin type) with thrombospondin type 1 motif, 10   | 3.75E-01  | 1.30 | 2.90E-08 | 12.67 |
| 4930451A13Rik | RIKEN cDNA 4930451A13 gene                                                                     | 8.68E-01  | 1.82 | 3.42E-08 | 12.66 |
| Nudt4         | nudix (nucleoside diphosphate linked moiety X)-type motif 4                                    | 3.31E-01  | 1.26 | 2.81E-08 | 12.65 |
| C4bp          | complement component 4 binding protein                                                         | -3.65E-01 | 0.78 | 2.91E-08 | 12.64 |
| Slc2a2        | solute carrier family 2 (facilitated glucose transporter), member 2                            | -4.58E-01 | 0.73 | 2.91E-08 | 12.64 |
| Prdx4         | peroxiredoxin 4                                                                                | -4.37E-01 | 0.74 | 3.03E-08 | 12.62 |
| Txnrd2        | thioredoxin reductase 2                                                                        | 3.73E-01  | 1.30 | 3.05E-08 | 12.61 |
| Ppib          | peptidylprolyl isomerase B                                                                     | -4.53E-01 | 0.73 | 2.95E-08 | 12.60 |
| Hip1r         | huntingtin interacting protein 1 related                                                       | 5.72E-01  | 1.49 | 3.16E-08 | 12.59 |
| Ndst1         | N-deacetylase/N-sulfotransferase (heparan glucosaminyl) 1                                      | -4.19E-01 | 0.75 | 3.05E-08 | 12.59 |
| Ass1          | argininosuccinate synthetase 1                                                                 | 4.21E-01  | 1.34 | 3.00E-08 | 12.58 |
| Epn2          | epsin 2                                                                                        | 5.31E-01  | 1.45 | 3.18E-08 | 12.58 |
| Plcb3         | phospholipase C, beta 3                                                                        | 6.66E-01  | 1.59 | 3.12E-08 | 12.57 |
| Gnb3          | guanine nucleotide binding protein, beta 3                                                     | -4.90E-01 | 0.71 | 3.28E-08 | 12.57 |
| Lactb2        | lactamase, beta 2                                                                              | -6.94E-01 | 0.62 | 3.02E-08 | 12.55 |
| Lyn           | Yamaguchi sarcoma viral (v-yes-1) oncogene homolog                                             | -4.33E-01 | 0.74 | 3.14E-08 | 12.54 |
| Arl6ip2       | ADP-ribosylation factor-like 6 interacting protein 2                                           | 4.33E-01  | 1.35 | 3.21E-08 | 12.53 |
| 1110029F20Rik | RIKEN cDNA 1110029F20 gene                                                                     | -4.53E-01 | 0.73 | 3.22E-08 | 12.50 |
| Hadhsc        | L-3-hydroxyacyl-Coenzyme A dehydrogenase, short chain                                          | -4.63E-01 | 0.73 | 3.57E-08 | 12.45 |
| Eva           | epithelial V-like antigen                                                                      | 5.24E-01  | 1.44 | 3.64E-08 | 12.45 |
| Rasl11b       | RAS-like, family 11, member B                                                                  | 6.13E-01  | 1.53 | 3.59E-08 | 12.44 |
| 1810027I20Rik | RIKEN cDNA 1810027I20 gene                                                                     | -4.95E-01 | 0.71 | 3.81E-08 | 12.40 |
| Tyms-ps       | Mouse thymidylate synthase pseudogene mRNA, complete cds.                                      | 4.33E-01  | 1.35 | 3.77E-08 | 12.37 |
| Siat9         | sialyltransferase 9 (CMP-NeuAc:lactosylceramide alpha-2,3-sialyltransferase)                   | 3.77E-01  | 1.30 | 3.70E-08 | 12.35 |
| H2-Bf         | histocompatibility 2, complement component factor B                                            | -3.55E-01 | 0.78 | 3.77E-08 | 12.35 |
| BC016548      | cDNA sequence BC016548                                                                         | 5.37E-01  | 1.45 | 3.79E-08 | 12.33 |
| Tkt           | transketolase                                                                                  | -3.71E-01 | 0.77 | 3.85E-08 | 12.32 |
| Aldh3a2       | aldehyde dehydrogenase family 3, subfamily A2                                                  | -4.26E-01 | 0.74 | 3.69E-08 | 12.32 |
| Ccr1l         | chemokine (C-C) receptor-like 1                                                                | 9.27E-01  | 1.90 | 3.69E-08 | 12.31 |
| Mgll          | monoglyceride lipase                                                                           | -4.38E-01 | 0.74 | 3.88E-08 | 12.31 |

**Supplementary Table 2. Xpd<sup>TTD</sup> vs. WT at old age (20 months)**

|               |                                                                                                 |           |      |          |       |
|---------------|-------------------------------------------------------------------------------------------------|-----------|------|----------|-------|
| 4933417N07Rik | Adult male testis cDNA, RIKEN full-length enriched library, clone:4933417N07 product:unknown ES | 5.59E-01  | 1.47 | 4.08E-08 | 12.31 |
| Uqcrb         | ubiquinol-cytochrome c reductase binding protein                                                | -4.31E-01 | 0.74 | 3.81E-08 | 12.30 |
| Atp1b1        | ATPase, Na <sup>+</sup> /K <sup>+</sup> transporting, beta 1 polypeptide                        | 4.57E-01  | 1.37 | 3.84E-08 | 12.29 |
| Lpl           | lipoprotein lipase                                                                              | 6.04E-01  | 1.52 | 3.88E-08 | 12.27 |
| Cdh2          | cadherin 2                                                                                      | -3.70E-01 | 0.77 | 3.81E-08 | 12.27 |
| Keg1          | kidney expressed gene 1                                                                         | -4.26E-01 | 0.74 | 4.27E-08 | 12.22 |
| Add2          | adducin 2 (beta)                                                                                | -3.54E-01 | 0.78 | 4.07E-08 | 12.21 |
| 3100002H09Rik | RIKEN cDNA 3100002H09 gene                                                                      | 4.06E-01  | 1.32 | 4.27E-08 | 12.21 |
| Polr2g        | polymerase (RNA) II (DNA directed) polypeptide G                                                | 4.17E-01  | 1.33 | 4.19E-08 | 12.19 |
| 2310039E09Rik | RIKEN cDNA 2310039E09 gene                                                                      | 4.85E-01  | 1.40 | 4.33E-08 | 12.18 |
| Ifftm3        | interferon induced transmembrane protein 3                                                      | -3.64E-01 | 0.78 | 4.37E-08 | 12.15 |
| Rpl29         | ribosomal protein L29                                                                           | -3.70E-01 | 0.77 | 4.20E-08 | 12.12 |
| Col3a1        | procollagen, type III, alpha 1                                                                  | 5.95E-01  | 1.51 | 4.57E-08 | 12.12 |
| Scd1          | stearoyl-Coenzyme A desaturase 1                                                                | -4.13E-01 | 0.75 | 4.27E-08 | 12.11 |
| Slc16a2       | solute carrier family 16 (monocarboxylic acid transporters), member 2                           | -4.41E-01 | 0.74 | 4.72E-08 | 12.08 |
| Prkag1        | protein kinase, AMP-activated, gamma 1 non-catalytic subunit                                    | 3.53E-01  | 1.28 | 4.59E-08 | 12.07 |
| Fln29         | FLN29 gene product                                                                              | 4.36E-01  | 1.35 | 4.58E-08 | 12.07 |
| 2810459M11Rik | RIKEN cDNA 2810459M11 gene                                                                      | -4.63E-01 | 0.73 | 4.57E-08 | 12.06 |
| 2810439M05Rik | RIKEN cDNA 2810439M05 gene                                                                      | 3.48E-01  | 1.27 | 4.82E-08 | 12.05 |
| 4833442J19Rik | RIKEN cDNA 4833442J19 gene                                                                      | 3.74E-01  | 1.30 | 4.65E-08 | 12.04 |
| Mrps24        | mitochondrial ribosomal protein S24                                                             | -4.05E-01 | 0.76 | 4.69E-08 | 12.04 |
| Hsd3b1        | hydroxysteroid dehydrogenase-1, delta<5>-3-beta                                                 | -4.48E-01 | 0.73 | 4.82E-08 | 12.03 |
| 5730403B10Rik | RIKEN cDNA 5730403B10 gene                                                                      | 3.59E-01  | 1.28 | 4.79E-08 | 12.02 |
| Rac1          | RAS-related C3 botulinum substrate 1                                                            | -3.98E-01 | 0.76 | 4.80E-08 | 12.00 |
| 4930429H24Rik | RIKEN cDNA 4930429H24 gene                                                                      | 4.67E-01  | 1.38 | 4.72E-08 | 12.00 |
| BC011105      | Similar to RAP1A, member of RAS oncogene family                                                 | -3.70E-01 | 0.77 | 5.12E-08 | 11.98 |
| 3110038L01Rik | RIKEN cDNA 3110038L01 gene                                                                      | -4.92E-01 | 0.71 | 5.39E-08 | 11.96 |
| 4832441H05Rik | 0 day neonate head cDNA, RIKEN full-length enriched library, clone:4832441H05 product:unclassif | 5.99E-01  | 1.51 | 5.14E-08 | 11.96 |
| Serf2         | small EDRK-rich factor 2                                                                        | -4.02E-01 | 0.76 | 5.21E-08 | 11.94 |
| 4930505O19Rik | RIKEN cDNA 4930505O19 gene                                                                      | 4.78E-01  | 1.39 | 5.19E-08 | 11.94 |
| Itm2b         | integral membrane protein 2B                                                                    | -4.57E-01 | 0.73 | 5.14E-08 | 11.93 |
| 5830442K09Rik | RIKEN cDNA 5830442K09 gene                                                                      | 3.90E-01  | 1.31 | 5.31E-08 | 11.91 |
| Hsd17b12      | hydroxysteroid (17-beta) dehydrogenase 12                                                       | -3.44E-01 | 0.79 | 5.26E-08 | 11.91 |
| Kcne4         | potassium voltage-gated channel, Isk-related subfamily, gene 4                                  | 4.37E-01  | 1.35 | 5.35E-08 | 11.90 |
| 2310047C04Rik | RIKEN cDNA 2310047C04 gene                                                                      | 5.37E-01  | 1.45 | 5.51E-08 | 11.89 |
| ORF18         | open reading frame 18                                                                           | -3.62E-01 | 0.78 | 5.53E-08 | 11.88 |
| Cyp46a1       | cytochrome P450, family 46, subfamily a, polypeptide 1                                          | 4.17E-01  | 1.33 | 5.68E-08 | 11.85 |
| Pgrmc1        | progesterone receptor membrane component 1                                                      | -4.87E-01 | 0.71 | 5.29E-08 | 11.85 |
| Akr1e1        | aldo-keto reductase family 1, member E1                                                         | -4.30E-01 | 0.74 | 5.56E-08 | 11.84 |
| Adh4          | alcohol dehydrogenase 4 (class II), pi polypeptide                                              | -6.28E-01 | 0.65 | 5.60E-08 | 11.83 |
| Furin         | furin (paired basic amino acid cleaving enzyme)                                                 | 3.56E-01  | 1.28 | 5.41E-08 | 11.83 |

**Supplementary Table 2. Xpd<sup>TTD</sup> vs. WT at old age (20 months)**

|               |                                                                                                |           |      |          |       |
|---------------|------------------------------------------------------------------------------------------------|-----------|------|----------|-------|
| Ttr           | transthyretin                                                                                  | -5.59E-01 | 0.68 | 6.05E-08 | 11.83 |
| 2810429C13Rik | RIKEN cDNA 2810429C13 gene                                                                     | -3.79E-01 | 0.77 | 5.56E-08 | 11.81 |
| Thy28         | thymocyte protein thy28                                                                        | -4.14E-01 | 0.75 | 5.98E-08 | 11.80 |
| 0610039K22Rik | RIKEN cDNA 0610039K22 gene                                                                     | -3.57E-01 | 0.78 | 5.70E-08 | 11.77 |
| 4930556L07Rik | RIKEN cDNA 4930556L07 gene                                                                     | 4.70E-01  | 1.38 | 6.01E-08 | 11.76 |
| Tpt1          | tumor protein, translationally-controlled 1                                                    | -5.17E-01 | 0.70 | 5.87E-08 | 11.75 |
| Itln          | intelectin                                                                                     | -3.49E-01 | 0.79 | 6.12E-08 | 11.74 |
| Prnp          | prion protein                                                                                  | -4.67E-01 | 0.72 | 6.13E-08 | 11.70 |
| Rnf13         | ring finger protein 13                                                                         | -4.00E-01 | 0.76 | 6.40E-08 | 11.69 |
| Zcchc8        | zinc finger, CCHC domain containing 8                                                          | 3.54E-01  | 1.28 | 6.58E-08 | 11.67 |
| Dhodh         | dihydroorotate dehydrogenase                                                                   | 4.41E-01  | 1.36 | 6.83E-08 | 11.67 |
| F9            | coagulation factor IX                                                                          | -6.43E-01 | 0.64 | 7.02E-08 | 11.67 |
| 2900056N03Rik | RIKEN cDNA 2900056N03 gene                                                                     | 4.06E-01  | 1.33 | 6.26E-08 | 11.67 |
| 8430418B16Rik | 16 days embryo lung cDNA, RIKEN full-length enriched library, clone:8430418B16 product:unclass | 3.55E-01  | 1.28 | 6.55E-08 | 11.64 |
| AB041803      | cDNA sequence AB041803                                                                         | 3.59E-01  | 1.28 | 6.58E-08 | 11.63 |
| Il12rb2       | interleukin 12 receptor, beta 2                                                                | 5.50E-01  | 1.46 | 6.90E-08 | 11.62 |
| Jmjd2c        | jumonji domain containing 2C                                                                   | 4.94E-01  | 1.41 | 6.59E-08 | 11.62 |
| Pfc           | properdin factor, complement                                                                   | -4.55E-01 | 0.73 | 6.67E-08 | 11.59 |
| Rpl27a        | ribosomal protein L27a                                                                         | -3.25E-01 | 0.80 | 7.02E-08 | 11.59 |
| 1190002H23Rik | RIKEN cDNA 1190002H23 gene                                                                     | 3.94E-01  | 1.31 | 7.02E-08 | 11.56 |
| Mlycd         | malonyl-CoA decarboxylase                                                                      | 4.08E-01  | 1.33 | 6.99E-08 | 11.56 |
| Rpl27         | ribosomal protein L27                                                                          | -4.68E-01 | 0.72 | 7.21E-08 | 11.56 |
| U68543        | Recombinant antineuraminidase single chain Ig VH and VL domains (LOC56304), mRNA               | -7.37E-01 | 0.60 | 7.88E-08 | 11.55 |
| Gcgr          | glucagon receptor                                                                              | -3.76E-01 | 0.77 | 6.90E-08 | 11.55 |
| 2210418O10Rik | RIKEN cDNA 2210418O10 gene                                                                     | 3.69E-01  | 1.29 | 7.44E-08 | 11.54 |
| Riok1         | RIO kinase 1 (yeast)                                                                           | 3.78E-01  | 1.30 | 7.26E-08 | 11.51 |
| Mrpl18        | mitochondrial ribosomal protein L18                                                            | -3.34E-01 | 0.79 | 7.22E-08 | 11.51 |
| Pafah1b3      | platelet-activating factor acetylhydrolase, isoform 1b, alpha1 subunit                         | -3.68E-01 | 0.77 | 7.26E-08 | 11.50 |
| Gsta3         | glutathione S-transferase, alpha 3                                                             | -5.38E-01 | 0.69 | 7.97E-08 | 11.49 |
| 9130403P13Rik | RIKEN cDNA 9130403P13 gene                                                                     | 5.09E-01  | 1.42 | 7.66E-08 | 11.49 |
| Tdo2          | tryptophan 2,3-dioxygenase                                                                     | 3.71E-01  | 1.29 | 7.40E-08 | 11.48 |
| D16Ert502e    | DNA segment, Chr 16, ERATO Doi 502, expressed                                                  | -4.54E-01 | 0.73 | 7.46E-08 | 11.47 |
| BC016198      | cDNA sequence BC016198                                                                         | 3.79E-01  | 1.30 | 7.76E-08 | 11.46 |
| Nedd1         | neural precursor cell expressed, developmentally down-regulated gene 1                         | 3.19E-01  | 1.25 | 7.46E-08 | 11.42 |
| Tmem9         | transmembrane protein 9                                                                        | 3.66E-01  | 1.29 | 7.95E-08 | 11.42 |
| Arch          | archease                                                                                       | -3.76E-01 | 0.77 | 7.96E-08 | 11.40 |
| 1500005N04Rik | RIKEN cDNA 1500005N04 gene                                                                     | 5.88E-01  | 1.50 | 8.31E-08 | 11.40 |
| Psmb8         | proteasome (prosome, macropain) subunit, beta type 8 (large multifunctional protease 7)        | -3.76E-01 | 0.77 | 7.87E-08 | 11.39 |
| 2810405L04Rik | RIKEN cDNA 2810405L04 gene                                                                     | -3.67E-01 | 0.78 | 8.07E-08 | 11.38 |
| Atp6v0c       | ATPase, H+ transporting, V0 subunit C                                                          | -3.67E-01 | 0.78 | 8.04E-08 | 11.35 |
| Uba52         | ubiquitin A-52 residue ribosomal protein fusion product 1                                      | -4.99E-01 | 0.71 | 8.68E-08 | 11.34 |

**Supplementary Table 2. Xpd<sup>TTD</sup> vs. WT at old age (20 months)**

|               |                                                                                                     |           |      |          |       |
|---------------|-----------------------------------------------------------------------------------------------------|-----------|------|----------|-------|
| 2400003B06Rik | RIKEN cDNA 2400003B06 gene                                                                          | -3.81E-01 | 0.77 | 8.23E-08 | 11.31 |
| Eif2c4        | eukaryotic translation initiation factor 2C, 4                                                      | 6.02E-01  | 1.52 | 8.68E-08 | 11.31 |
| 1700023A20Rik | Adult male testis cDNA, RIKEN full-length enriched library, clone:1700023A20 product:unknown ES     | 5.23E-01  | 1.44 | 8.68E-08 | 11.30 |
| Pcbp1         | poly(rC) binding protein 1                                                                          | -3.29E-01 | 0.80 | 8.70E-08 | 11.30 |
| MGC37245      | hypothetical protein MGC37245                                                                       | 3.36E-01  | 1.26 | 8.64E-08 | 11.28 |
| Arf4l         | ADP-ribosylation factor 4-like                                                                      | 4.75E-01  | 1.39 | 9.17E-08 | 11.25 |
| Ubl5          | ubiquitin-like 5                                                                                    | -3.23E-01 | 0.80 | 8.68E-08 | 11.25 |
| Cds2          | CDP-diacylglycerol synthase (phosphatidate cytidylyltransferase) 2                                  | 3.53E-01  | 1.28 | 9.31E-08 | 11.25 |
| Plxnb2        | plexin B2                                                                                           | -4.85E-01 | 0.71 | 9.91E-08 | 11.22 |
| Hspcb         | heat shock protein 1, beta                                                                          | -4.28E-01 | 0.74 | 9.74E-08 | 11.22 |
| 4921525D07Rik | Adult male testis cDNA, RIKEN full-length enriched library, clone:4921525D07 product:unknown ES     | 5.00E-01  | 1.41 | 9.57E-08 | 11.21 |
| 1110031K21Rik | RIKEN cDNA 1110031K21 gene                                                                          | 8.21E-01  | 1.77 | 1.01E-07 | 11.21 |
| Stat3         | signal transducer and activator of transcription 3                                                  | 4.95E-01  | 1.41 | 8.99E-08 | 11.19 |
| Timm8b        | translocase of inner mitochondrial membrane 8 homolog b (yeast)                                     | -4.16E-01 | 0.75 | 9.67E-08 | 11.18 |
| Adh1          | alcohol dehydrogenase 1 (class I)                                                                   | -4.59E-01 | 0.73 | 9.46E-08 | 11.16 |
| Aes           | amino-terminal enhancer of split                                                                    | -4.94E-01 | 0.71 | 9.31E-08 | 11.16 |
| C430014D17Rik | RIKEN cDNA C430014D17 gene                                                                          | 3.66E-01  | 1.29 | 1.00E-07 | 11.16 |
| Mapk7         | mitogen-activated protein kinase 7                                                                  | 5.70E-01  | 1.48 | 1.04E-07 | 11.11 |
| Dhrs3         | dehydrogenase/reductase (SDR family) member 3                                                       | -4.22E-01 | 0.75 | 9.74E-08 | 11.10 |
| Pygl          | liver glycogen phosphorylase                                                                        | -3.59E-01 | 0.78 | 1.04E-07 | 11.10 |
| Serpina10     | serine (or cysteine) proteinase inhibitor, clade A (alpha-1 antiproteinase, antitrypsin), member 10 | -3.90E-01 | 0.76 | 1.07E-07 | 11.08 |
| Rps26         | ribosomal protein S26                                                                               | -3.84E-01 | 0.77 | 1.04E-07 | 11.08 |
| AK018218      |                                                                                                     | 3.53E-01  | 1.28 | 1.05E-07 | 11.06 |
| Rps19         | ribosomal protein S19                                                                               | -3.97E-01 | 0.76 | 1.09E-07 | 11.00 |
| Phpt1         | phosphohistidine phosphatase 1                                                                      | -4.56E-01 | 0.73 | 1.13E-07 | 10.98 |
| 4933409L06Rik | RIKEN cDNA 4933409L06 gene                                                                          | 4.74E-01  | 1.39 | 1.18E-07 | 10.98 |
| Sept5         | septin 5                                                                                            | 5.18E-01  | 1.43 | 1.13E-07 | 10.97 |
| Itgax         | integrin alpha X                                                                                    | 3.74E-01  | 1.30 | 1.16E-07 | 10.94 |
| Baat          | bile acid-Coenzyme A: amino acid N-acyltransferase                                                  | -3.30E-01 | 0.80 | 1.12E-07 | 10.93 |
| 4930526F13Rik | Adult male testis cDNA, RIKEN full-length enriched library, clone:4930526F13 product:unclassifiabl  | 3.53E-01  | 1.28 | 1.26E-07 | 10.90 |
| Brp17         | brain protein 17                                                                                    | -4.71E-01 | 0.72 | 1.19E-07 | 10.90 |
| 2810403P18Rik | RIKEN cDNA 2810403P18 gene                                                                          | 5.89E-01  | 1.50 | 1.26E-07 | 10.89 |
| Jag1          | jagged 1                                                                                            | 3.77E-01  | 1.30 | 1.26E-07 | 10.88 |
| C1qtnf4       | C1q and tumor necrosis factor related protein 4                                                     | -3.92E-01 | 0.76 | 1.26E-07 | 10.87 |
| D11Lgp2e      | DNA segment, Chr 11, Lothar Hennighausen 2, expressed                                               | -4.67E-01 | 0.72 | 1.26E-07 | 10.87 |
| 2310007F21Rik | RIKEN cDNA 2310007F21 gene                                                                          | 4.41E-01  | 1.36 | 1.24E-07 | 10.86 |
| Tfrc          | transferrin receptor                                                                                | 3.96E-01  | 1.32 | 1.25E-07 | 10.86 |
| Kbtbd2        | kelch repeat and BTB (POZ) domain containing 2                                                      | 4.34E-01  | 1.35 | 1.26E-07 | 10.83 |
| Dok2          | downstream of tyrosine kinase 2                                                                     | 4.47E-01  | 1.36 | 1.33E-07 | 10.82 |
| Apoa5         | apolipoprotein A-V                                                                                  | -3.81E-01 | 0.77 | 1.26E-07 | 10.82 |
| 4631405K08Rik | 0 day neonate skin cDNA, RIKEN full-length enriched library, clone:4631405K08 product:unknown       | 3.91E-01  | 1.31 | 1.36E-07 | 10.80 |

**Supplementary Table 2. Xpd<sup>TTD</sup> vs. WT at old age (20 months)**

|               |                                                                                                  |           |      |          |       |
|---------------|--------------------------------------------------------------------------------------------------|-----------|------|----------|-------|
| Bri3          | brain protein I3                                                                                 | -3.98E-01 | 0.76 | 1.33E-07 | 10.79 |
| Acat2         | acetyl-Coenzyme A acetyltransferase 2                                                            | -5.27E-01 | 0.69 | 1.33E-07 | 10.78 |
| Zfp313        | zinc finger protein 313                                                                          | 4.56E-01  | 1.37 | 1.33E-07 | 10.78 |
| Gcdh          | glutaryl-Coenzyme A dehydrogenase                                                                | -3.80E-01 | 0.77 | 1.33E-07 | 10.77 |
| Krt1-17       | keratin complex 1, acidic, gene 17                                                               | -3.34E-01 | 0.79 | 1.33E-07 | 10.76 |
| BC003479      | cDNA sequence BC003479                                                                           | -4.11E-01 | 0.75 | 1.38E-07 | 10.76 |
| Ppp1ca        | protein phosphatase 1, catalytic subunit, alpha isoform                                          | -3.36E-01 | 0.79 | 1.36E-07 | 10.74 |
| Rpl24         | ribosomal protein L24                                                                            | -4.57E-01 | 0.73 | 1.47E-07 | 10.73 |
| Cideb         | cell death-inducing DNA fragmentation factor, alpha subunit-like effector B                      | -3.25E-01 | 0.80 | 1.38E-07 | 10.73 |
| Map1lc3b      | microtubule-associated protein 1 light chain 3 beta                                              | 3.96E-01  | 1.32 | 1.40E-07 | 10.73 |
| Ndufs5        | NADH dehydrogenase (ubiquinone) Fe-S protein 5                                                   | -4.33E-01 | 0.74 | 1.39E-07 | 10.72 |
| BC003281      | cDNA sequence BC003281                                                                           | -4.07E-01 | 0.75 | 1.39E-07 | 10.71 |
| Dnajb11       | DnaJ (Hsp40) homolog, subfamily B, member 11                                                     | -3.99E-01 | 0.76 | 1.39E-07 | 10.70 |
| Slc39a1       | Solute carrier family 39 (zinc transporter), member 1 (Slc39a1), mRNA                            | -3.41E-01 | 0.79 | 1.51E-07 | 10.65 |
| 1200009B18Rik | RIKEN cDNA 1200009B18 gene                                                                       | 5.27E-01  | 1.44 | 1.58E-07 | 10.64 |
| Sfrs9         | splicing factor, arginine/serine rich 9                                                          | -3.53E-01 | 0.78 | 1.53E-07 | 10.63 |
| Atp5j         | ATP synthase, H+ transporting, mitochondrial F0 complex, subunit F                               | -5.07E-01 | 0.70 | 1.54E-07 | 10.63 |
| Cd79a         | CD79A antigen (immunoglobulin-associated alpha)                                                  | -4.99E-01 | 0.71 | 1.61E-07 | 10.61 |
| Slc1a5        | solute carrier family 1 (neutral amino acid transporter), member 5                               | 4.19E-01  | 1.34 | 1.50E-07 | 10.61 |
| 2700045P11Rik | RIKEN cDNA 2700045P11 gene                                                                       | 3.40E-01  | 1.27 | 1.55E-07 | 10.60 |
| 0610011D08Rik | RIKEN cDNA 0610011D08 gene                                                                       | -4.34E-01 | 0.74 | 1.55E-07 | 10.59 |
| 3632413B07Rik | RIKEN cDNA 3632413B07 gene                                                                       | -3.28E-01 | 0.80 | 1.54E-07 | 10.59 |
| 1200011D03Rik | RIKEN cDNA 1200011D03 gene                                                                       | -6.04E-01 | 0.66 | 1.57E-07 | 10.59 |
| Il1r1         | interleukin 1 receptor, type I                                                                   | 7.17E-01  | 1.64 | 1.58E-07 | 10.58 |
| Zfp145        | zinc finger protein 145                                                                          | 3.73E-01  | 1.30 | 1.61E-07 | 10.58 |
| CRAD-L        | cis-retinol/3alpha hydroxysterol short-chain dehydrogenase-like                                  | -3.84E-01 | 0.77 | 1.54E-07 | 10.57 |
| Ctdsp1        | CTD (carboxy-terminal domain, RNA polymerase II, polypeptide A) small phosphatase 1              | -3.68E-01 | 0.77 | 1.60E-07 | 10.54 |
| Irf4          | interferon regulatory factor 4                                                                   | -4.25E-01 | 0.74 | 1.73E-07 | 10.52 |
| 2610206G21Rik | 10 days embryo whole body cDNA, RIKEN full-length enriched library, clone:2610206G21 product:1   | 4.22E-01  | 1.34 | 1.66E-07 | 10.51 |
| Zfp54         | zinc finger protein 54                                                                           | 3.23E-01  | 1.25 | 1.69E-07 | 10.49 |
| Slco1b2       | solute carrier organic anion transporter family, member 1b2                                      | -5.61E-01 | 0.68 | 1.60E-07 | 10.49 |
| Rpl7a         | ribosomal protein L7a                                                                            | -3.65E-01 | 0.78 | 1.69E-07 | 10.47 |
| Rbp1          | retinol binding protein 1, cellular                                                              | 5.09E-01  | 1.42 | 1.77E-07 | 10.46 |
| Semcap3       | semaF cytoplasmic domain associated protein 3                                                    | 5.08E-01  | 1.42 | 1.83E-07 | 10.46 |
| Fkbp11        | FK506 binding protein 11                                                                         | -4.65E-01 | 0.72 | 1.84E-07 | 10.46 |
| 9530025L08Rik | Adult male urinary bladder cDNA, RIKEN full-length enriched library, clone:9530025L08 product:un | -4.10E-01 | 0.75 | 1.80E-07 | 10.45 |
| Rasgrf1       | RAS protein-specific guanine nucleotide-releasing factor 1                                       | -4.06E-01 | 0.75 | 1.75E-07 | 10.43 |
| Rdx           | radixin                                                                                          | -3.79E-01 | 0.77 | 1.77E-07 | 10.43 |
| Rai1          | retinoic acid induced 1                                                                          | 3.88E-01  | 1.31 | 1.85E-07 | 10.39 |
| Arrdc2        | arrestin domain containing 2                                                                     | -3.36E-01 | 0.79 | 1.94E-07 | 10.34 |
| Klk16         | kallikrein 16                                                                                    | 6.29E-01  | 1.55 | 2.28E-07 | 10.34 |

**Supplementary Table 2. Xpd<sup>TTD</sup> vs. WT at old age (20 months)**

|               |                                                                                   |           |      |          |       |
|---------------|-----------------------------------------------------------------------------------|-----------|------|----------|-------|
| A2bp1         | ataxin 2 binding protein 1                                                        | 3.47E-01  | 1.27 | 1.98E-07 | 10.34 |
| 9030624L02Rik | RIKEN cDNA 9030624L02 gene                                                        | -3.43E-01 | 0.79 | 1.97E-07 | 10.33 |
| Acaa2         | acetyl-Coenzyme A acyltransferase 2 (mitochondrial 3-oxoacyl-Coenzyme A thiolase) | -3.40E-01 | 0.79 | 1.97E-07 | 10.33 |
| Dmgdh         | dimethylglycine dehydrogenase precursor                                           | -3.60E-01 | 0.78 | 1.85E-07 | 10.32 |
| Dyrk2         | Similar to DYRK2 protein (LOC380662), mRNA                                        | 3.03E-01  | 1.23 | 1.93E-07 | 10.31 |
| Th1l          | TH1-like homolog (Drosophila)                                                     | 6.29E-01  | 1.55 | 1.99E-07 | 10.28 |
| Rpl38         | ribosomal protein L38                                                             | -4.28E-01 | 0.74 | 1.98E-07 | 10.28 |
| Pitx1         | paired-like homeodomain transcription factor 1                                    | 3.63E-01  | 1.29 | 1.99E-07 | 10.28 |
| V2r15         | vomer nasal 2, receptor, 15                                                       | 5.15E-01  | 1.43 | 2.00E-07 | 10.27 |
| Ndufb10       | NADH dehydrogenase (ubiquinone) 1 beta subcomplex, 10                             | -3.59E-01 | 0.78 | 1.97E-07 | 10.26 |
| C1s           | complement component 1, s subcomponent                                            | -3.62E-01 | 0.78 | 2.04E-07 | 10.25 |
| Pccb          | propionyl Coenzyme A carboxylase, beta polypeptide                                | -3.66E-01 | 0.78 | 1.98E-07 | 10.24 |
| Gmfg          | glia maturation factor, gamma                                                     | -3.51E-01 | 0.78 | 2.15E-07 | 10.24 |
| Trmt1         | tRNA (5-methylaminomethyl-2-thiouridylate)-methyltransferase 1                    | 3.46E-01  | 1.27 | 2.12E-07 | 10.23 |
| Serpina3k     | serine (or cysteine) proteinase inhibitor, clade A, member 3K                     | 3.36E-01  | 1.26 | 2.06E-07 | 10.23 |
| Zfyve19       | zinc finger, FYVE domain containing 19                                            | -3.27E-01 | 0.80 | 2.06E-07 | 10.22 |
| Psmc3         | proteasome (prosome, macropain) 26S subunit, ATPase 3                             | -3.26E-01 | 0.80 | 2.05E-07 | 10.21 |
| Stch          | stress 70 protein chaperone, microsomal-associated, human homolog                 | -3.60E-01 | 0.78 | 2.14E-07 | 10.21 |
| Hsd3b3        | hydroxysteroid dehydrogenase-3, delta<5>-3-beta                                   | -4.04E-01 | 0.76 | 2.05E-07 | 10.21 |
| Ankrd10       | ankyrin repeat domain 10                                                          | 3.73E-01  | 1.30 | 2.18E-07 | 10.17 |
| Proc          | protein C                                                                         | -5.75E-01 | 0.67 | 2.24E-07 | 10.17 |
| BC023121      | CDNA clone MGC:28609 IMAGE:4218551, complete cds                                  | 3.95E-01  | 1.31 | 2.16E-07 | 10.16 |
| Taz           | tafazzin                                                                          | -3.35E-01 | 0.79 | 2.22E-07 | 10.16 |
| Cdk5rap1      | CDK5 regulatory subunit associated protein 1                                      | 4.84E-01  | 1.40 | 2.47E-07 | 10.15 |
| Mgst1         | microsomal glutathione S-transferase 1                                            | -5.06E-01 | 0.70 | 2.14E-07 | 10.14 |
| Yars          | tyrosyl-tRNA synthetase                                                           | -3.72E-01 | 0.77 | 2.32E-07 | 10.14 |
| Cox5b         | cytochrome c oxidase, subunit Vb                                                  | -3.85E-01 | 0.77 | 2.48E-07 | 10.12 |
| Oprs1         | opioid receptor, sigma 1                                                          | -3.78E-01 | 0.77 | 2.30E-07 | 10.11 |
| 2010107E04Rik | RIKEN cDNA 2010107E04 gene                                                        | -3.64E-01 | 0.78 | 2.14E-07 | 10.11 |
| Inpp5d        | inositol polyphosphate-5-phosphatase D                                            | -3.99E-01 | 0.76 | 2.29E-07 | 10.10 |
| 1300002A08Rik | RIKEN cDNA 1300002A08 gene                                                        | -5.25E-01 | 0.70 | 2.31E-07 | 10.10 |
| Mat1a         | methionine adenosyltransferase I, alpha                                           | 4.79E-01  | 1.39 | 2.30E-07 | 10.08 |
| 2700038P16Rik | RIKEN cDNA 2700038P16 gene                                                        | 2.81E-01  | 1.21 | 2.37E-07 | 10.07 |
| Rpl39         | ribosomal protein L39                                                             | -4.49E-01 | 0.73 | 2.36E-07 | 10.05 |
| 2610039E05Rik | RIKEN cDNA 2610039E05 gene                                                        | -4.10E-01 | 0.75 | 2.51E-07 | 10.02 |
| 1110018O08Rik | RIKEN cDNA 1110018O08 gene                                                        | 5.98E-01  | 1.51 | 2.49E-07 | 10.00 |
