# Supplementary material for: Homeostatic Imbalance between Apoptosis and Cell Renewal in the Liver of Premature Aging XpdTTD Mice
Source: PubMed Central journal article supplement (PMC2396506; doi:10.1371/journal.pone.0002346), 2008-06-11
Supplement: pone.0002346.s004.pdf [file pone.0002346.s004.pdf]

**Supplementary Table 3. Gene Ontology Analysis of Xpd<sup>TTD</sup> vs. WT at young age (3 months)**

| GO ID | Total number of genes in array | NO OF Under-expressed gene | No. of Over-expressed gene | No. of Changed genes | P-Value (Under) | P-Value (Over) | P-Value (Changed) | GO Term                                      |
|-------|--------------------------------|----------------------------|----------------------------|----------------------|-----------------|----------------|-------------------|----------------------------------------------|
| 8152  | 4664                           | 85                         | 85                         | 170                  | 0.1504          | 0.0183         | 0.0116            | metabolism                                   |
| 43170 | 2439                           | 46                         | 50                         | 96                   | 0.1948          | 0.0137         | 0.0129            | macromolecule metabolism                     |
| 9058  | 862                            | 24                         | 28                         | 52                   | 0.0088          | 0.0001         | 0                 | biosynthesis                                 |
| 9059  | 647                            | 21                         | 21                         | 42                   | 0.0025          | 0.0009         | 0                 | macromolecule biosynthesis                   |
| 6629  | 451                            | 27                         | 11                         | 38                   | 0               | 0.0895         | 0                 | lipid metabolism                             |
| 6952  | 674                            | 13                         | 18                         | 31                   | 0.339           | 0.0157         | 0.0275            | defense response                             |
| 6955  | 590                            | 12                         | 16                         | 28                   | 0.2841          | 0.0197         | 0.0248            | immune response                              |
| 8219  | 435                            | 7                          | 16                         | 23                   | 0.5975          | 0.0011         | 0.0132            | cell death                                   |
| 16265 | 444                            | 7                          | 16                         | 23                   | 0.6193          | 0.0013         | 0.0164            | death                                        |
| 6412  | 435                            | 5                          | 16                         | 21                   | 0.8598          | 0.0011         | 0.0414            | protein biosynthesis                         |
| 9613  | 397                            | 7                          | 13                         | 20                   | 0.4995          | 0.0084         | 0.0315            | response to pest, pathogen or parasite       |
| 12501 | 407                            | 6                          | 14                         | 20                   | 0.6825          | 0.0041         | 0.0393            | programmed cell death                        |
| 8610  | 183                            | 17                         | 2                          | 19                   | 0               | 0.7791         | 0                 | lipid biosynthesis                           |
| 19752 | 315                            | 10                         | 9                          | 19                   | 0.0387          | 0.0552         | 0.0063            | carboxylic acid metabolism                   |
| 6082  | 317                            | 10                         | 9                          | 19                   | 0.0401          | 0.057          | 0.0068            | organic acid metabolism                      |
| 6066  | 185                            | 14                         | 4                          | 18                   | 0               | 0.3207         | 0                 | alcohol metabolism                           |
| 8202  | 114                            | 14                         | 2                          | 16                   | 0               | 0.5289         | 0                 | steroid metabolism                           |
| 42981 | 265                            | 6                          | 9                          | 15                   | 0.2841          | 0.0216         | 0.0243            | regulation of apoptosis                      |
| 43067 | 269                            | 6                          | 9                          | 15                   | 0.2957          | 0.0235         | 0.0273            | regulation of programmed cell death          |
| 6694  | 65                             | 11                         | 1                          | 12                   | 0               | 0.638          | 0                 | steroid biosynthesis                         |
| 16125 | 52                             | 10                         | 2                          | 12                   | 0               | 0.1918         | 0                 | sterol metabolism                            |
| 6091  | 189                            | 4                          | 7                          | 11                   | 0.3902          | 0.0272         | 0.0418            | energy pathways                              |
| 6917  | 140                            | 3                          | 7                          | 10                   | 0.417           | 0.0059         | 0.0149            | induction of apoptosis                       |
| 12502 | 141                            | 3                          | 7                          | 10                   | 0.4215          | 0.0062         | 0.0156            | induction of programmed cell death           |
| 43065 | 149                            | 3                          | 7                          | 10                   | 0.4569          | 0.0083         | 0.022             | positive regulation of apoptosis             |
| 43068 | 150                            | 3                          | 7                          | 10                   | 0.4613          | 0.0086         | 0.023             | positive regulation of programmed cell death |
| 6520  | 157                            | 3                          | 7                          | 10                   | 0.4914          | 0.0108         | 0.0303            | amino acid metabolism                        |
| 16126 | 23                             | 9                          | 0                          | 9                    | 0               | 1              | 0                 | sterol biosynthesis                          |
| 8203  | 44                             | 7                          | 2                          | 9                    | 0               | 0.1478         | 0                 | cholesterol metabolism                       |
| 6959  | 135                            | 2                          | 7                          | 9                    | 0.6646          | 0.0049         | 0.0301            | humoral immune response                      |
| 6869  | 56                             | 5                          | 3                          | 8                    | 0.0024          | 0.0554         | 0.0004            | lipid transport                              |
| 16064 | 90                             | 2                          | 6                          | 8                    | 0.4467          | 0.0026         | 0.0083            | humoral defense mechanism (sensu Vertebrata) |
| 6695  | 17                             | 7                          | 0                          | 7                    | 0               | 1              | 0                 | cholesterol biosynthesis                     |
| 6958  | 23                             | 0                          | 6                          | 6                    | 1               | 0              | 0.0001            | complement activation, classical pathway     |
| 6956  | 33                             | 0                          | 6                          | 6                    | 1               | 0              | 0.0006            | complement activation                        |
| 6720  | 19                             | 4                          | 1                          | 5                    | 0.0002          | 0.2564         | 0.0003            | isoprenoid metabolism                        |

**Supplementary Table 3. Gene Ontology Analysis of Xpd<sup>TTD</sup> vs. WT at young age (3 months)**

|       |    |   |   |   |        |        |        |                                                               |
|-------|----|---|---|---|--------|--------|--------|---------------------------------------------------------------|
| 19835 | 21 | 1 | 3 | 4 | 0.2988 | 0.0039 | 0.0041 | cytolysis                                                     |
| 7515  | 21 | 3 | 1 | 4 | 0.0049 | 0.2792 | 0.0041 | lymph gland development                                       |
| 9063  | 37 | 0 | 4 | 4 | 1      | 0.0024 | 0.0302 | amino acid catabolism                                         |
| 8299  | 9  | 3 | 0 | 3 | 0.0004 | 1      | 0.0024 | isoprenoid biosynthesis                                       |
| 6378  | 13 | 0 | 3 | 3 | 1      | 0.0009 | 0.0074 | mRNA polyadenylation                                          |
| 9060  | 14 | 1 | 2 | 3 | 0.2107 | 0.0191 | 0.0092 | aerobic respiration                                           |
| 9072  | 18 | 1 | 2 | 3 | 0.2623 | 0.0309 | 0.0188 | aromatic amino acid family metabolism                         |
| 30041 | 18 | 1 | 2 | 3 | 0.2623 | 0.0309 | 0.0188 | actin filament polymerization                                 |
| 19221 | 20 | 1 | 2 | 3 | 0.2868 | 0.0376 | 0.0251 | cytokine and chemokine mediated signaling pathway             |
| 6953  | 21 | 0 | 3 | 3 | 1      | 0.0039 | 0.0286 | acute-phase response                                          |
| 45333 | 21 | 1 | 2 | 3 | 0.2988 | 0.0411 | 0.0286 | cellular respiration                                          |
| 46916 | 26 | 0 | 3 | 3 | 1      | 0.0072 | 0.0498 | transition metal ion homeostasis                              |
| 15910 | 2  | 2 | 0 | 2 | 0.0003 | 1      | 0.001  | peroxisomal long-chain fatty acid import                      |
| 15909 | 4  | 2 | 0 | 2 | 0.0016 | 1      | 0.0059 | long-chain fatty acid transport                               |
| 7096  | 5  | 0 | 2 | 2 | 1      | 0.0023 | 0.0097 | regulation of exit from mitosis                               |
| 6558  | 6  | 1 | 1 | 2 | 0.0964 | 0.0892 | 0.0142 | L-phenylalanine metabolism                                    |
| 15908 | 6  | 2 | 0 | 2 | 0.004  | 1      | 0.0142 | fatty acid transport                                          |
| 7520  | 6  | 2 | 0 | 2 | 0.004  | 1      | 0.0142 | myoblast fusion                                               |
| 1523  | 7  | 1 | 1 | 2 | 0.1115 | 0.1033 | 0.0195 | retinoid metabolism                                           |
| 6349  | 7  | 2 | 0 | 2 | 0.0055 | 1      | 0.0195 | imprinting                                                    |
| 30516 | 7  | 1 | 1 | 2 | 0.1115 | 0.1033 | 0.0195 | regulation of axon extension                                  |
| 6957  | 8  | 0 | 2 | 2 | 1      | 0.0062 | 0.0254 | complement activation, alternative pathway                    |
| 9401  | 8  | 2 | 0 | 2 | 0.0073 | 1      | 0.0254 | phosphoenolpyruvate-dependent sugar phosphotransferase system |
| 5978  | 9  | 0 | 2 | 2 | 1      | 0.008  | 0.032  | glycogen biosynthesis                                         |
| 6084  | 10 | 2 | 0 | 2 | 0.0115 | 1      | 0.0392 | acetyl-CoA metabolism                                         |
| 9250  | 10 | 0 | 2 | 2 | 1      | 0.0098 | 0.0392 | glucan biosynthesis                                           |
| 6924  | 1  | 0 | 1 | 1 | 1      | 0.0155 | 0.0322 | programmed cell death, activated T-cells                      |
| 10107 | 1  | 0 | 1 | 1 | 1      | 0.0155 | 0.0322 | potassium ion import                                          |
| 7362  | 1  | 1 | 0 | 1 | 0.0167 | 1      | 0.0322 | terminal region determination                                 |
| 7354  | 1  | 1 | 0 | 1 | 0.0167 | 1      | 0.0322 | zygotic determination of anterior/posterior axis, embryo      |
| 6858  | 1  | 1 | 0 | 1 | 0.0167 | 1      | 0.0322 | extracellular transport                                       |
| 10090 | 1  | 1 | 0 | 1 | 0.0167 | 1      | 0.0322 | trichome morphogenesis (sensu Magnoliophyta)                  |
| 10026 | 1  | 1 | 0 | 1 | 0.0167 | 1      | 0.0322 | trichome differentiation (sensu Magnoliophyta)                |
| 1811  | 1  | 1 | 0 | 1 | 0.0167 | 1      | 0.0322 | negative regulation of type I hypersensitivity                |
| 1748  | 1  | 1 | 0 | 1 | 0.0167 | 1      | 0.0322 | optic placode development (sensu Drosophila)                  |
| 6507  | 1  | 0 | 1 | 1 | 1      | 0.0155 | 0.0322 | GPI anchor release                                            |
| 6433  | 1  | 0 | 1 | 1 | 1      | 0.0155 | 0.0322 | prolyl-tRNA aminoacylation                                    |
| 45188 | 1  | 0 | 1 | 1 | 1      | 0.0155 | 0.0322 | regulation of circadian sleep/wake cycle, non-REM sleep       |
| 18350 | 1  | 0 | 1 | 1 | 1      | 0.0155 | 0.0322 | protein amino acid esterification                             |

**Supplementary Table 3. Gene Ontology Analysis of Xpd<sup>TTD</sup> vs. WT at young age (3 months)**

|       |   |   |   |   |        |        |        |                                                               |
|-------|---|---|---|---|--------|--------|--------|---------------------------------------------------------------|
| 45071 | 1 | 1 | 0 | 1 | 0.0167 | 1      | 0.0322 | negative regulation of viral genome replication               |
| 50902 | 1 | 1 | 0 | 1 | 0.0167 | 1      | 0.0322 | leukocyte adhesive activation                                 |
| 51041 | 1 | 1 | 0 | 1 | 0.0167 | 1      | 0.0322 | positive regulation of calcium-independent cell-cell adhesion |
| 51040 | 1 | 1 | 0 | 1 | 0.0167 | 1      | 0.0322 | regulation of calcium-independent cell-cell adhesion          |
| 42977 | 1 | 1 | 0 | 1 | 0.0167 | 1      | 0.0322 | tyrosine phosphorylation of JAK2 protein                      |
| 42976 | 1 | 1 | 0 | 1 | 0.0167 | 1      | 0.0322 | activation of JAK protein                                     |
| 48272 | 1 | 1 | 0 | 1 | 0.0167 | 1      | 0.0322 | trichome morphogenesis                                        |
| 48271 | 1 | 1 | 0 | 1 | 0.0167 | 1      | 0.0322 | trichome differentiation                                      |
| 30887 | 1 | 1 | 0 | 1 | 0.0167 | 1      | 0.0322 | positive regulation of dendritic cell activation              |
| 30885 | 1 | 1 | 0 | 1 | 0.0167 | 1      | 0.0322 | regulation of dendritic cell activation                       |
| 42748 | 1 | 0 | 1 | 1 | 1      | 0.0155 | 0.0322 | circadian sleep/wake cycle, non-REM sleep                     |
| 9272  | 1 | 0 | 1 | 1 | 1      | 0.0155 | 0.0322 | cell wall biosynthesis (sensu Fungi)                          |
| 46951 | 1 | 1 | 0 | 1 | 0.0167 | 1      | 0.0322 | ketone body biosynthesis                                      |
| 46950 | 1 | 1 | 0 | 1 | 0.0167 | 1      | 0.0322 | ketone body metabolism                                        |
| 15679 | 1 | 0 | 1 | 1 | 1      | 0.0155 | 0.0322 | plasma membrane copper ion transport                          |
| 7521  | 1 | 1 | 0 | 1 | 0.0167 | 1      | 0.0322 | muscle cell fate determination                                |
