# Supplementary material for: Homeostatic Imbalance between Apoptosis and Cell Renewal in the Liver of Premature Aging XpdTTD Mice
Source: PubMed Central journal article supplement (PMC2396506; doi:10.1371/journal.pone.0002346), 2008-06-11
Supplement: pone.0002346.s005.pdf [file pone.0002346.s005.pdf]

**Supplementary Table 4. Gene Ontology Analysis of Xpd<sup>TTD</sup> vs. WT at old age (20 months)**

| GO ID | Total number of genes in array | No of Under-expressed gene | No. of Over-expressed gene | No. of Changed genes | P-Value (Under) | P-Value (Over) | P-Value (Changed) | GO Term                                            |
|-------|--------------------------------|----------------------------|----------------------------|----------------------|-----------------|----------------|-------------------|----------------------------------------------------|
| 7582  | 7625                           | 246                        | 164                        | 410                  | 0.0004          | 0.4221         | 0.0031            | physiological process                              |
| 50875 | 6953                           | 218                        | 153                        | 371                  | 0.0257          | 0.2476         | 0.0228            | cellular physiological process                     |
| 8152  | 5151                           | 187                        | 117                        | 304                  | 0               | 0.1692         | 0                 | metabolism                                         |
| 44237 | 4930                           | 172                        | 114                        | 286                  | 0.0005          | 0.1165         | 0.0004            | cellular metabolism                                |
| 44238 | 4714                           | 155                        | 105                        | 260                  | 0.0206          | 0.2791         | 0.0227            | primary metabolism                                 |
| 50896 | 1693                           | 66                         | 34                         | 100                  | 0.0065          | 0.6732         | 0.0441            | response to stimulus                               |
| 9058  | 885                            | 54                         | 25                         | 79                   | 0               | 0.0869         | 0                 | biosynthesis                                       |
| 44249 | 852                            | 51                         | 24                         | 75                   | 0               | 0.0945         | 0                 | cellular biosynthesis                              |
| 6629  | 516                            | 48                         | 19                         | 67                   | 0               | 0.0139         | 0                 | lipid metabolism                                   |
| 6950  | 945                            | 39                         | 23                         | 62                   | 0.016           | 0.2781         | 0.0176            | response to stress                                 |
| 9607  | 867                            | 43                         | 17                         | 60                   | 0.0004          | 0.6746         | 0.0067            | response to biotic stimulus                        |
| 6091  | 471                            | 36                         | 18                         | 54                   | 0               | 0.0116         | 0                 | generation of precursor metabolites and energy     |
| 44255 | 423                            | 37                         | 16                         | 53                   | 0               | 0.0184         | 0                 | cellular lipid metabolism                          |
| 9056  | 791                            | 33                         | 18                         | 51                   | 0.0226          | 0.4182         | 0.0393            | catabolism                                         |
| 6952  | 735                            | 37                         | 11                         | 48                   | 0.0007          | 0.9197         | 0.0371            | defense response                                   |
| 6082  | 372                            | 32                         | 15                         | 47                   | 0               | 0.0131         | 0                 | organic acid metabolism                            |
| 19752 | 370                            | 32                         | 15                         | 47                   | 0               | 0.0126         | 0                 | carboxylic acid metabolism                         |
| 6955  | 647                            | 32                         | 11                         | 43                   | 0.0022          | 0.8197         | 0.0369            | immune response                                    |
| 9059  | 534                            | 30                         | 11                         | 41                   | 0.0004          | 0.5882         | 0.0045            | macromolecule biosynthesis                         |
| 6412  | 469                            | 30                         | 8                          | 38                   | 0               | 0.787          | 0.0025            | protein biosynthesis                               |
| 6118  | 276                            | 19                         | 14                         | 33                   | 0.0004          | 0.0023         | 0                 | electron transport                                 |
| 43207 | 454                            | 27                         | 6                          | 33                   | 0.0003          | 0.9257         | 0.0214            | response to external biotic stimulus               |
| 30154 | 487                            | 15                         | 18                         | 33                   | 0.4497          | 0.0159         | 0.0501            | cell differentiation                               |
| 9613  | 439                            | 26                         | 6                          | 32                   | 0.0005          | 0.9107         | 0.0224            | response to pest, pathogen or parasite             |
| 8610  | 208                            | 21                         | 8                          | 29                   | 0               | 0.0762         | 0                 | lipid biosynthesis                                 |
| 6519  | 240                            | 18                         | 9                          | 27                   | 0.0002          | 0.0706         | 0.0001            | amino acid and derivative metabolism               |
| 9308  | 277                            | 18                         | 9                          | 27                   | 0.0012          | 0.1366         | 0.0008            | amine metabolism                                   |
| 6520  | 182                            | 15                         | 9                          | 24                   | 0.0003          | 0.0157         | 0                 | amino acid metabolism                              |
| 6066  | 216                            | 18                         | 6                          | 24                   | 0.0001          | 0.3118         | 0.0002            | alcohol metabolism                                 |
| 6631  | 141                            | 16                         | 6                          | 22                   | 0               | 0.0803         | 0                 | fatty acid metabolism                              |
| 8202  | 130                            | 20                         | 2                          | 22                   | 0               | 0.7682         | 0                 | steroid metabolism                                 |
| 15980 | 150                            | 12                         | 5                          | 17                   | 0.0014          | 0.2151         | 0.0014            | energy derivation by oxidation of organic compound |

**Supplementary Table 4. Gene Ontology Analysis of Xpd<sup>TTD</sup> vs. WT at old age (20 months)**

|       |     |    |   |    |        |        |        |                                          |
|-------|-----|----|---|----|--------|--------|--------|------------------------------------------|
| 6694  | 70  | 15 | 0 | 15 | 0      | 1      | 0      | steroid biosynthesis                     |
| 51186 | 170 | 13 | 2 | 15 | 0.0014 | 0.8808 | 0.0246 | cofactor metabolism                      |
| 6732  | 140 | 12 | 2 | 14 | 0.0008 | 0.8029 | 0.0109 | coenzyme metabolism                      |
| 9117  | 153 | 7  | 7 | 14 | 0.1589 | 0.0448 | 0.0222 | nucleotide metabolism                    |
| 6959  | 159 | 14 | 0 | 14 | 0.0002 | 1      | 0.0297 | humoral immune response                  |
| 9889  | 135 | 8  | 5 | 13 | 0.0435 | 0.1605 | 0.0185 | regulation of biosynthesis               |
| 16125 | 60  | 9  | 2 | 11 | 0.0001 | 0.3661 | 0.0002 | sterol metabolism                        |
| 45595 | 120 | 7  | 4 | 11 | 0.0609 | 0.2521 | 0.0394 | regulation of cell differentiation       |
| 9165  | 99  | 6  | 4 | 10 | 0.0687 | 0.1598 | 0.0271 | nucleotide biosynthesis                  |
| 6633  | 59  | 5  | 4 | 9  | 0.0282 | 0.0365 | 0.0026 | fatty acid biosynthesis                  |
| 6869  | 63  | 9  | 0 | 9  | 0.0001 | 1      | 0.0041 | lipid transport                          |
| 9309  | 70  | 5  | 4 | 9  | 0.0529 | 0.0616 | 0.0082 | amine biosynthesis                       |
| 16053 | 72  | 5  | 4 | 9  | 0.0584 | 0.0669 | 0.0098 | organic acid biosynthesis                |
| 46394 | 72  | 5  | 4 | 9  | 0.0584 | 0.0669 | 0.0098 | carboxylic acid biosynthesis             |
| 6092  | 87  | 7  | 2 | 9  | 0.0133 | 0.5558 | 0.0307 | main pathways of carbohydrate metabolism |
| 6006  | 89  | 6  | 3 | 9  | 0.0451 | 0.294  | 0.0348 | glucose metabolism                       |
| 9064  | 36  | 5  | 3 | 8  | 0.0036 | 0.0405 | 0.0003 | glutamine family amino acid metabolism   |
| 6807  | 39  | 4  | 4 | 8  | 0.0261 | 0.0091 | 0.0006 | nitrogen compound metabolism             |
| 6956  | 41  | 8  | 0 | 8  | 0      | 1      | 0.0009 | complement activation                    |
| 8652  | 50  | 4  | 4 | 8  | 0.0571 | 0.0214 | 0.0033 | amino acid biosynthesis                  |
| 16042 | 69  | 5  | 3 | 8  | 0.0502 | 0.1812 | 0.0221 | lipid catabolism                         |
| 15849 | 73  | 3  | 5 | 8  | 0.358  | 0.0194 | 0.0299 | organic acid transport                   |
| 46942 | 73  | 3  | 5 | 8  | 0.358  | 0.0194 | 0.0299 | carboxylic acid transport                |
| 16126 | 26  | 7  | 0 | 7  | 0      | 1      | 0.0002 | sterol biosynthesis                      |
| 6112  | 36  | 3  | 4 | 7  | 0.0864 | 0.0069 | 0.0018 | energy reserve metabolism                |
| 8203  | 51  | 5  | 2 | 7  | 0.0159 | 0.2958 | 0.0134 | cholesterol metabolism                   |
| 6865  | 53  | 2  | 5 | 7  | 0.4598 | 0.0052 | 0.0164 | amino acid transport                     |
| 9310  | 57  | 5  | 2 | 7  | 0.0247 | 0.3429 | 0.0236 | amine catabolism                         |
| 15837 | 59  | 2  | 5 | 7  | 0.5164 | 0.0082 | 0.028  | amine transport                          |
| 6790  | 62  | 6  | 1 | 7  | 0.0091 | 0.7374 | 0.0355 | sulfur metabolism                        |
| 42445 | 62  | 6  | 1 | 7  | 0.0091 | 0.7374 | 0.0355 | hormone metabolism                       |
| 6766  | 63  | 5  | 2 | 7  | 0.0361 | 0.389  | 0.0383 | vitamin metabolism                       |
| 9084  | 19  | 3  | 3 | 6  | 0.0168 | 0.0072 | 0.0002 | glutamine family amino acid biosynthesis |
| 6958  | 30  | 6  | 0 | 6  | 0.0002 | 1      | 0.0034 | complement activation, classical pathway |
| 5976  | 41  | 3  | 3 | 6  | 0.1163 | 0.056  | 0.0159 | polysaccharide metabolism                |

**Supplementary Table 4. Gene Ontology Analysis of Xpd<sup>TTD</sup> vs. WT at old age (20 months)**

|       |    |   |   |   |        |        |        |                                                            |
|-------|----|---|---|---|--------|--------|--------|------------------------------------------------------------|
| 9063  | 48 | 4 | 2 | 6 | 0.0504 | 0.2721 | 0.0324 | amino acid catabolism                                      |
| 6576  | 51 | 5 | 1 | 6 | 0.0159 | 0.6669 | 0.042  | biogenic amine metabolism                                  |
| 96    | 22 | 4 | 1 | 5 | 0.0034 | 0.3772 | 0.0041 | sulfur amino acid metabolism                               |
| 6775  | 25 | 4 | 1 | 5 | 0.0055 | 0.4162 | 0.0073 | fat-soluble vitamin metabolism                             |
| 6720  | 26 | 4 | 1 | 5 | 0.0064 | 0.4286 | 0.0087 | isoprenoid metabolism                                      |
| 5977  | 27 | 2 | 3 | 5 | 0.185  | 0.0191 | 0.0102 | glycogen metabolism                                        |
| 6073  | 28 | 2 | 3 | 5 | 0.1957 | 0.021  | 0.012  | glucan metabolism                                          |
| 9069  | 28 | 4 | 1 | 5 | 0.0083 | 0.4528 | 0.012  | serine family amino acid metabolism                        |
| 30333 | 33 | 5 | 0 | 5 | 0.0025 | 1      | 0.0235 | antigen processing                                         |
| 44264 | 36 | 2 | 3 | 5 | 0.2823 | 0.0405 | 0.0331 | cellular polysaccharide metabolism                         |
| 7163  | 37 | 3 | 2 | 5 | 0.092  | 0.1856 | 0.0367 | establishment and/or maintenance of cell polarity          |
| 50    | 6  | 1 | 3 | 4 | 0.1625 | 0.0002 | 0.0001 | urea cycle                                                 |
| 6525  | 13 | 2 | 2 | 4 | 0.0534 | 0.0301 | 0.0032 | arginine metabolism                                        |
| 51    | 14 | 2 | 2 | 4 | 0.0611 | 0.0346 | 0.0043 | urea cycle intermediate metabolism                         |
| 19216 | 16 | 3 | 1 | 4 | 0.0103 | 0.2913 | 0.0071 | regulation of lipid metabolism                             |
| 6695  | 20 | 4 | 0 | 4 | 0.0024 | 1      | 0.0162 | cholesterol biosynthesis                                   |
| 46698 | 24 | 3 | 1 | 4 | 0.0315 | 0.4035 | 0.0304 | metamorphosis (sensu Insecta)                              |
| 7552  | 24 | 3 | 1 | 4 | 0.0315 | 0.4035 | 0.0304 | metamorphosis                                              |
| 42775 | 25 | 4 | 0 | 4 | 0.0055 | 1      | 0.0348 | ATP synthesis coupled electron transport (sensu Eukaryota) |
| 42773 | 26 | 4 | 0 | 4 | 0.0064 | 1      | 0.0395 | ATP synthesis coupled electron transport                   |
| 2165  | 27 | 3 | 1 | 4 | 0.0427 | 0.4408 | 0.0446 | larval or pupal development (sensu Insecta)                |
| 48005 | 5  | 3 | 0 | 3 | 0.0002 | 1      | 0.0012 | antigen presentation, exogenous peptide antigen            |
| 1736  | 7  | 1 | 2 | 3 | 0.187  | 0.0088 | 0.0038 | establishment of planar polarity                           |
| 6526  | 7  | 1 | 2 | 3 | 0.187  | 0.0088 | 0.0038 | arginine biosynthesis                                      |
| 44271 | 7  | 1 | 2 | 3 | 0.187  | 0.0088 | 0.0038 | nitrogen compound biosynthesis                             |
| 1738  | 8  | 1 | 2 | 3 | 0.2107 | 0.0116 | 0.0059 | morphogenesis of a polarized epithelium                    |
| 6957  | 9  | 3 | 0 | 3 | 0.0018 | 1      | 0.0085 | complement activation, alternative pathway                 |
| 6637  | 9  | 2 | 1 | 3 | 0.0266 | 0.176  | 0.0085 | acyl-CoA metabolism                                        |
| 7164  | 10 | 1 | 2 | 3 | 0.256  | 0.0181 | 0.0117 | establishment of tissue polarity                           |
| 6081  | 10 | 3 | 0 | 3 | 0.0025 | 1      | 0.0117 | aldehyde metabolism                                        |
| 48002 | 10 | 3 | 0 | 3 | 0.0025 | 1      | 0.0117 | antigen presentation, peptide antigen                      |
| 6544  | 11 | 3 | 0 | 3 | 0.0034 | 1      | 0.0155 | glycine metabolism                                         |
| 42692 | 11 | 0 | 3 | 3 | 1      | 0.0014 | 0.0155 | muscle cell differentiation                                |
| 42591 | 11 | 3 | 0 | 3 | 0.0034 | 1      | 0.0155 | antigen presentation, exogenous antigen via MHC class II   |
| 19886 | 11 | 3 | 0 | 3 | 0.0034 | 1      | 0.0155 | antigen processing, exogenous antigen via MHC class II     |

**Supplementary Table 4. Gene Ontology Analysis of Xpd<sup>TTD</sup> vs. WT at old age (20 months)**

|       |    |   |   |   |        |        |        |                                                      |
|-------|----|---|---|---|--------|--------|--------|------------------------------------------------------|
| 7424  | 12 | 1 | 2 | 3 | 0.2987 | 0.0258 | 0.0199 | tracheal system development (sensu Insecta)          |
| 6536  | 12 | 2 | 1 | 3 | 0.046  | 0.2275 | 0.0199 | glutamate metabolism                                 |
| 50818 | 14 | 2 | 1 | 3 | 0.0611 | 0.2601 | 0.0306 | regulation of coagulation                            |
| 19884 | 15 | 3 | 0 | 3 | 0.0086 | 1      | 0.0368 | antigen presentation, exogenous antigen              |
| 7298  | 2  | 1 | 1 | 2 | 0.0574 | 0.0421 | 0.0025 | border cell migration (sensu Insecta)                |
| 7297  | 2  | 1 | 1 | 2 | 0.0574 | 0.0421 | 0.0025 | follicle cell migration (sensu Insecta)              |
| 6477  | 3  | 2 | 0 | 2 | 0.0025 | 1      | 0.0074 | protein amino acid sulfation                         |
| 9749  | 3  | 2 | 0 | 2 | 0.0025 | 1      | 0.0074 | response to glucose stimulus                         |
| 9746  | 3  | 2 | 0 | 2 | 0.0025 | 1      | 0.0074 | response to hexose stimulus                          |
| 42067 | 3  | 1 | 1 | 2 | 0.0849 | 0.0625 | 0.0074 | establishment of ommatidial polarity (sensu Endopt   |
| 6636  | 4  | 1 | 1 | 2 | 0.1115 | 0.0824 | 0.0142 | fatty acid desaturation                              |
| 50853 | 4  | 2 | 0 | 2 | 0.0049 | 1      | 0.0142 | B-cell receptor signaling pathway                    |
| 16203 | 4  | 1 | 1 | 2 | 0.1115 | 0.0824 | 0.0142 | muscle attachment                                    |
| 46831 | 4  | 0 | 2 | 2 | 1      | 0.0026 | 0.0142 | regulation of RNA-nucleus export                     |
| 30497 | 4  | 2 | 0 | 2 | 0.0049 | 1      | 0.0142 | fatty acid elongation                                |
| 42051 | 4  | 1 | 1 | 2 | 0.1115 | 0.0824 | 0.0142 | eye photoreceptor development (sensu Endopteryg      |
| 10016 | 5  | 2 | 0 | 2 | 0.008  | 1      | 0.0229 | shoot morphogenesis                                  |
| 19217 | 5  | 1 | 1 | 2 | 0.1374 | 0.102  | 0.0229 | regulation of fatty acid metabolism                  |
| 1751  | 5  | 1 | 1 | 2 | 0.1374 | 0.102  | 0.0229 | eye photoreceptor cell differentiation (sensu Endopt |
| 9743  | 5  | 2 | 0 | 2 | 0.008  | 1      | 0.0229 | response to carbohydrate stimulus                    |
| 48367 | 5  | 2 | 0 | 2 | 0.008  | 1      | 0.0229 | shoot development                                    |
| 8594  | 5  | 1 | 1 | 2 | 0.1374 | 0.102  | 0.0229 | photoreceptor cell morphogenesis (sensu Endopteryg   |
| 7467  | 6  | 1 | 1 | 2 | 0.1625 | 0.1211 | 0.0332 | photoreceptor cell differentiation (sensu Endopteryg |
| 45671 | 6  | 2 | 0 | 2 | 0.0117 | 1      | 0.0332 | negative regulation of osteoclast differentiation    |
| 6546  | 6  | 2 | 0 | 2 | 0.0117 | 1      | 0.0332 | glycine catabolism                                   |
| 6534  | 6  | 1 | 1 | 2 | 0.1625 | 0.1211 | 0.0332 | cysteine metabolism                                  |
| 1678  | 6  | 1 | 1 | 2 | 0.1625 | 0.1211 | 0.0332 | cell glucose homeostasis                             |
| 43288 | 6  | 2 | 0 | 2 | 0.0117 | 1      | 0.0332 | apocarotenoid metabolism                             |
| 42574 | 6  | 2 | 0 | 2 | 0.0117 | 1      | 0.0332 | retinal metabolism                                   |
| 42267 | 6  | 2 | 0 | 2 | 0.0117 | 1      | 0.0332 | natural killer cell mediated cytotoxicity            |
| 42093 | 6  | 1 | 1 | 2 | 0.1625 | 0.1211 | 0.0332 | T-helper cell differentiation                        |
| 45834 | 6  | 1 | 1 | 2 | 0.1625 | 0.1211 | 0.0332 | positive regulation of lipid metabolism              |
| 7476  | 7  | 1 | 1 | 2 | 0.187  | 0.1398 | 0.045  | wing morphogenesis                                   |
| 7472  | 7  | 1 | 1 | 2 | 0.187  | 0.1398 | 0.045  | wing disc metamorphosis                              |
| 7304  | 7  | 1 | 1 | 2 | 0.187  | 0.1398 | 0.045  | eggshell formation (sensu Insecta)                   |

**Supplementary Table 4. Gene Ontology Analysis of Xpd<sup>TTD</sup> vs. WT at old age (20 months)**

|       |   |   |   |   |        |        |       |                                          |
|-------|---|---|---|---|--------|--------|-------|------------------------------------------|
| 45408 | 7 | 1 | 1 | 2 | 0.187  | 0.1398 | 0.045 | regulation of interleukin-6 biosynthesis |
| 6590  | 7 | 2 | 0 | 2 | 0.0161 | 1      | 0.045 | thyroid hormone generation               |
| 6537  | 7 | 1 | 1 | 2 | 0.187  | 0.1398 | 0.045 | glutamate biosynthesis                   |
| 1523  | 7 | 1 | 1 | 2 | 0.187  | 0.1398 | 0.045 | retinoid metabolism                      |
| 6113  | 7 | 2 | 0 | 2 | 0.0161 | 1      | 0.045 | fermentation                             |
| 6109  | 7 | 1 | 1 | 2 | 0.187  | 0.1398 | 0.045 | regulation of carbohydrate metabolism    |
| 30703 | 7 | 1 | 1 | 2 | 0.187  | 0.1398 | 0.045 | eggshell formation                       |
| 42403 | 7 | 2 | 0 | 2 | 0.0161 | 1      | 0.045 | thyroid hormone metabolism               |
| 42226 | 7 | 1 | 1 | 2 | 0.187  | 0.1398 | 0.045 | interleukin-6 biosynthesis               |
