# Supplementary material for: Homeostatic Imbalance between Apoptosis and Cell Renewal in the Liver of Premature Aging XpdTTD Mice
Source: PubMed Central journal article supplement (PMC2396506; doi:10.1371/journal.pone.0002346), 2008-06-11
Supplement: pone.0002346.s006.pdf [file pone.0002346.s006.pdf]

**Table S5. Functional categories of genes that are significantly down-, or up-regulated in the liver of XpdTTD compared to wild type controls.**

| No | Functional Category | Young (3 month)                                                                                                                                                                                  |                                                                                                            | Old (20 months)                                                                                                                                                                                                                           |                                                                                                                                                      |
|----|---------------------|--------------------------------------------------------------------------------------------------------------------------------------------------------------------------------------------------|------------------------------------------------------------------------------------------------------------|-------------------------------------------------------------------------------------------------------------------------------------------------------------------------------------------------------------------------------------------|------------------------------------------------------------------------------------------------------------------------------------------------------|
|    |                     | Genes significantly down-regulated                                                                                                                                                               | Genes significantly up-regulated                                                                           | Genes significantly down-regulated                                                                                                                                                                                                        | Genes significantly up-regulated                                                                                                                     |
| 1  | Apoptosis           | CD2, CUL4A, MAPK1<br>OCIL, PRLR, TGFB1,<br>VEGFA                                                                                                                                                 | APOE, C9, CEBPB, CLU,<br>CSTB, DSIP1, EIF5A, F2,<br>IL18, LTBR, RPS5, TDE1,<br>TNFRSF6, TNFRSF3,<br>TRAF1, | CD5L, CIDEB, GRIM19,<br>INPP5D, LGALS1, LY86,<br>OCIL, PRLR, PERP,<br>PHLDA1, PROC, SPP1,<br>TUBB2, YARS,                                                                                                                                 | AKT1, APLP1, BTG2,<br>CEBPB, EGFR,<br>GADD45G, GRIP1,<br>GDNF, IGF1R, NGFR,<br>SOCS2, TDE1, ZBTB16,                                                  |
| 2  | Lipid metabolism    | AACS, ABCD2,<br>ACAA1, ACACB,<br>ALDH3A2, CYP51,<br>DHCR7, DPM1,<br>EBPL, ELOVL5,<br>FABP1, FABP3, FASN,<br>FDFT1, FDPS,<br>HMGCS 2, NSDHL,<br>OSBP2, PCYT2,<br>PRLR, PLTP, RDH1,<br>SC5D, SQLE, | APOC2, APOE, APOM<br>CLU, CYP7B1, GPLD1,<br>HADH2, IMPK, LCAT,<br>LPIN, LDHD, PLA2G12A,<br>RARRES2         | AADAC, ACAA1,<br>ACAA2, ACAT2, ADH1,<br>ADH4, ADFP, AKR1C20,<br>ALDH1A1, ALDH1A7,<br>ALDH3A2, APOA2,<br>APOA5, APOC1, APOC4,<br>APOF, BAAT, DCI, DBI,<br>DHRS3, EBPL, ELOVL5,<br>FABP1, FADS1, FASN,<br>FDPS, HADHSC,<br>HAD11B1, HSD3B1, | AASDHPPT, CDS2,<br>CYP46A1, FADS3,<br>GPLD1, GRN, HNF4,<br>LCAT, LPIN1, LPL,<br>MLYCD, NGFR, NUDT4,<br>PGC1, PIP5K2C, PLCB3,<br>PRKAG1, RBP1, SIAT9, |

|   |                                                  |                                                                                                   |                                                                                                           |                                                                                                                                                                                           |      |
|---|--------------------------------------------------|---------------------------------------------------------------------------------------------------|-----------------------------------------------------------------------------------------------------------|-------------------------------------------------------------------------------------------------------------------------------------------------------------------------------------------|------|
|   |                                                  | STARD4, TM7SF2                                                                                    |                                                                                                           | HSD3B3, HSD17B4,<br>HSD17B12, HMGCS2,<br>LIP1, LPC, MGLL,<br>NR1H4, OPRS1,<br>PAFAH1B3, PCCB, PECR,<br>PLTP, PPARA, PRLR,<br>SCD1, SC5D, SCP2,<br>SEC14L2, SPP1, SQLE,<br>SULT2A2, TM7SF2 |      |
| 3 | Steroid biosynthesis                             | ACYP51, CYP51,<br>DHCR7, FDFT1,<br>FDPS, HMGCS2,<br>NSDHL, PRLR, SC5D,<br>SQLE, STARD4,<br>TM7SF2 | None                                                                                                      | AKR1C20, DBI, HSD3B1,<br>HSD3B3, FDPS,<br>HMGCS2, HSD17B12,<br>HSD17B4, HSD3B1,<br>HSD3B3, OPRS1, PRLR,<br>SC5D, SCP2, SEC14L2,<br>SQLE, TM7SF2                                           | None |
| 4 | Electron transport/<br>oxidative phosphorylation | ACAA1, COX7B,<br>CYP2B9, CYP51,<br>FMO2, HAO3, HRC,<br>SQLE, HK2, MRPL1                           | COX5A, CYP1A2,<br>CYP2C29, CYP4F15,<br>CYP7B1, LDHD, MRPS35<br>APOM, AGL, CYP2B9,<br>GPT1, LDHD, SDS, TPI | ATPJ5, ARP5J2,<br>ATP6V0C, COX5B,<br>NDUFC1, NDUFS5,<br>NDUFA6, NDUFA10,<br>UQCR, UQCRB                                                                                                   |      |

|   |                           |                              |           |                                                                                                                              |                          |
|---|---------------------------|------------------------------|-----------|------------------------------------------------------------------------------------------------------------------------------|--------------------------|
|   |                           |                              |           |                                                                                                                              |                          |
| 5 | energy reserve metabolism | None                         | AGL, GLG1 | None                                                                                                                         | LEPR, AGL, G6PC, SLC37A4 |
| 6 | xenobiotic metabolism     | CYP2b20, CYP2b9, CYP51, PRG2 |           | CYP2B10, CYP2B9, CYP2C40, CYP2J5, CYP3A11, CYP4F14, CYP4V3, GSTZ1, GSTA3, SLC12A4, SLC12A2, SLC2A2, SLC33A1, SLC39A1, SLC1B2 | None                     |
